# Supplementary material for: Interferences caused by the biogeochemical methane cycle in peats during the assessment of abandoned oil wells
Source: Copernicus journal article supplement (doi:10.5194/bg-22-809-2025), 2025-02-15
Supplement: Supplementary file 1 [file bg-22-809-2025-supplement.zip]

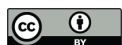

## *Supplement of*

# **Interferences caused by the biogeochemical methane cycle in peats during the assessment of abandoned oil wells**

**Sebastian F. A. Jordan et al.**

*Correspondence to:* Sebastian F. A. Jordan ([sjordan@gfo.uni-kiel.de](mailto:sjordan@gfo.uni-kiel.de)) and Martin Blumenberg ([martin.blumenberg@bgr.de](mailto:martin.blumenberg@bgr.de))

- [bg-22-809-2025-supplement-title-page.pdf](#)
- [SFA Jordan et al. 2024 - Data supplement.xlsx](#)
- [SFA Jordan et al. 2024 - Supplement.pdf](#)

The copyright of individual parts of the supplement might differ from the article licence.
