# Supplementary material for: Interferences caused by the biogeochemical methane cycle in peats during the assessment of abandoned oil wells
Source: Copernicus journal article supplement (doi:10.5194/bg-22-809-2025), 2025-02-15
Supplement: Supplementary file 1 [file bg-22-809-2025-supplement.zip]

## Sheet: Table S1 Soil gas, isotopes
ID	LIMS-ID	Date	Time (UTC)	Sample site	Depth [cm]	East EPSG 4647	North EPSG 4647	area	CH4	Ethane	Ethene	Propane	Propene	Iso-Butane	n-Butane	trans-2-Butene	1-Butene	Iso-Butene	cis-2-Butene	Iso-Pentane	n-Pentane	CO2	Ne	Ar	O2	N2	CO	He	H2	Areal mean CH4 [ppm]	Median [ppm]	d-13C-CO2	d-13C-CH4	d-D-CH4	mean d-13C-CO2	mean d-13C-CH4	mean d-D-CH4	e:d-13C-CH4-d-13C-CO2	FCH4_DRY_mean_Lin	FCO2_DRY_mean	N2/O2	CO2 [vol %]
BG-1	2201810	2022-03-09	11:20:00	Rodewald WA-211	57	32525924	5836503	forest	2.00065	0	0	0	0	0	0	0	0	0	0	0	0	15521.7	0	9251.09	194032	781193	0	0	0	7.45313	2.10091	-23.24	-49		-23.284	-51		25.76	-0.1326	1.6818	4.02611	1.55217
BG-2	2201811	2022-03-09	11:30:00	Rodewald WA-211	67	32525929	5836508	forest	0.294132	0	0	0	0	0	0	0	0	0	0	0	0	7956.25	0	9227.2	204358	778458	0	0	0			-23.34							-1.2498	2.8917	3.80928	0.795625
BG-3	2201812	2022-03-09	11:40:00	Rodewald WA-211	45	32525929	5836498	forest	2.11813	0	0	0	0	0	0	0	0	0	0	0	0	10868.5	0	9212.11	200997	778920	0	0	0			-22.89	-53					30.11	0.0137	2.7225	3.87527	1.08685
BG-4	2201813	2022-03-09	11:45:00	Rodewald WA-211	67	32525919	5836498	forest	1.20954	0	0	0	0	0	0	0	0	0	0	0	0	23948.7	0	9250.27	184412	782388	0	0	0			-23.63							0.004	1.4744	4.24261	2.39487
BG-5	2201814	2022-03-09	11:50:00	Rodewald WA-211	65	32525919	5836508	forest	1.54542	0	0	0	0	0	0	0	0	0	0	0	0	8265.04	0	9201.2	203789	778743	0	0	0			-23.32							-0.0081	0.8468	3.82133	0.826504
BG-6	2201815	2022-03-09	14:15:00	Reference-Site #1 Forest	50	32526039	5836416	forest	2.20614	0	0	0	0	0	0	0	0	0	0	0	0	8925.62	0	9245.12	201127	780700	0	0	0			-23.09	-50.2		-23.0267	-49.6		27.11	-0.0419	1.3847	3.88162	0.892562
BG-7	2201816	2022-03-09	14:40:00	Reference-Site #1 Forest	67	32526029	5836406	forest	2.08369	0	0	0	0	0	0	0	0	0	0	0	0	5285.88	0	9200.25	206837	778675	0	0	0			-23.08	-49.3					26.22	-0.0052	0.7293	3.76468	0.528588
BG-8	2201817	2022-03-09	15:20:00	Reference-Site #1 Forest	30	32526049	5836426	forest	2.04309	0	0	0	0	0	0	0	0	0	0	0	0	4711.23	0	9209.84	206855	779222	0	0	0			-22.91	-49.3					26.39	-0.1729	0.8537	3.767	0.471123
BG-9	2201818	2022-03-10	13:55:00	Rodewald WA-209	40	32526148	5836399	forest	1.38014	0	0	0	0	0	0	0	0	0	0	0	0	1045.28	0	9252.14	210281	779420	0	0	0			-22.01			-22.8863	-56.3			-2.214	1.5303	3.70656	0.104528
BG-10	2201819	2022-03-10	14:05:00	Rodewald WA-209	60	32526143	5836394	forest	1.07132	0	0	0	0	0	0	0	0	0	0	0	0	20588.4	0	9311.17	185266	784833	0	0	0			-23.38							-0.61	2.2199	4.23626	2.05884
BG-11	2201820	2022-03-10	14:10:00	Rodewald WA-209	60	32526153	5836394	forest	2.61289	0	0	0	0	0	0	0	0	0	0	0	0	4478.96	0	9213.23	206993	779312	0	0	0			-21.83	-55.4					33.57	0.0177	1.8388	3.76491	0.447896
BG-12	2201821	2022-03-10	14:15:00	Rodewald WA-209	50	32526143	5836404	forest	2.13469	0	0	0	0	0	0	0	0	0	0	0	0	11272.9	0	9252.81	197674	781798	0	0	0			-23.21	-53.6					30.39	-1.0892	1.5748	3.95499	1.12729
BG-15	2201824	2022-03-10	15:35:00	Rodewald WA-209	35	32526153	5836404	forest	0.877073	0	0	0	0	0	0	0	0	0.0641073	0	0	0	5424.23	0	9260.29	206311	779004	0	0	0			-22.93							-0.0135	1.6922	3.77587	0.542423
BG-17	2202602	2022-03-30	09:26:00	Rodewald WA-273	63	32525761	5836338	forest	0.804845	0	0	0	0	0	0	0	0	0.0770667	0	0	0	21021.6	0	9244.08	191782	777951	0	0	0			-23.9			-23.774	-48.3			-1.2223	3.3351	4.05642	2.10216
BG-18	2202603	2022-03-30	09:36:00	Rodewald WA-273	75	32525756	5836343	forest	2.02277	0	0	0	0	0	0	0	0	0.0773803	0	0	0	28150.7	0	9373.87	175717	786757	0	0	0			-23.98	-46.4					22.42	-0.6785	1.8129	4.47742	2.81507
BG-19	2202604	2022-03-30	09:45:00	Rodewald WA-273	80	32525766	5836343	forest	1.14215	0	0	0	0	0	0	0	0	0.0694008	0	0	0	34234.3	0	9351.47	171532	784881	0	0	0			-23.32							-0.7769	1.7167	4.57572	3.42343
BG-20	2202605	2022-03-30	09:55:00	Rodewald WA-273	78	32525766	5836333	forest	0.609224	0	0	0	0	0	0	0	0	0.0761501	0	0	0	17016.3	0	9315.47	192613	781054	0	0	0			-23.57							-2.4928	2.1882	4.05503	1.70163
BG-21	2202606	2022-03-30	10:05:00	Rodewald WA-273	80	32525756	5836333	forest	2.54321	0	0	0	0	0	0	0	0	0.0766317	0	0	0	25214.4	0	9480.43	170796	794506	0	0	0			-24.1	-50.2					26.1	-0.0115	1.8096	4.65178	2.52144
BG-22	2202607	2022-03-30	12:45:00	Reference-Site #2 Forest	75	32525781	5836296	forest	2.53886	0	0	0	0	0	0	0	0	0.084002	0	0	0	10235.2	0	9322.4	197013	783426	0	0	0			-23.32	-55.6		-23.6333	-56.1333		32.28	-1.3546	1.2148	3.97652	1.02352
BG-23	2202608	2022-03-30	13:00:00	Reference-Site #2 Forest	83	32525771	5836296	forest	8.31064	0	0	0	0	0	0	0	0	0.0875609	0	0	0	20162.5	0	9418.88	181645	788765	0	0	0			-23.76	-54.8					31.04			4.34234	2.01625
BG-24	2202609	2022-03-30	13:30:00	Reference-Site #2 Forest	75	32525791	5836296	forest	4.65184	0	0	0.0474269	0	0	0	0	0	0.0812345	0	0	0	29448.1	0	9493.04	165577	795477	0	0	0			-23.82	-58					34.18	-0.8554	2.4341	4.80428	2.94481
BG-25	2202610	2022-03-31	10:00:00	Rodewald WA-274	80	3.25258e+07	5.8363e+06	forest	2.30115	0	0	0	0	0	0	0	0	0.0901914	0	0	0	15442.9	0	9414.45	186793	788347	0	0	0			-23.98	-57.6		-24.17	-60.9633		33.62	-1.7685	1.713	4.22042	1.54429
BG-26	2202611	2022-03-31	10:05:00	Rodewald WA-274	80	3.25258e+07	5.8363e+06	forest	93.4945	0.0273029	0.0351939	0.137183	0	0.0216743	0.0235598	0	0	0.0638301	0	0.0255289	0.0337727	51912	0	10198.4	81257.4	856538	0	0	0			-24.22	-76.39					52.17	-0.8672	1.9262	10.541	5.1912
BG-27	2202612	2022-03-31	10:10:00	Rodewald WA-274	80	3.25258e+07	5.83629e+06	forest	1.25134	0	0	0	0	0	0	0	0	0.0840261	0	0	0	23949.6	0	9392.26	178103	788554	0	0	0			-23.95							-2.0199	1.0283	4.42753	2.39496
BG-28	2202613	2022-03-31	10:20:00	Rodewald WA-274	80	3.25258e+07	5.83629e+06	forest	1.5302	0	0	0	0	0	0	0	0	0.0475394	0	0	0	25752	0	9491.34	167852	796903	0	0	0			-23.98							-2.393	1.1566	4.74764	2.5752
BG-29	2202614	2022-03-31	10:25:00	Rodewald WA-274	80	3.25258e+07	5.8363e+06	forest	2.79501	0.0255481	0.0539827	0.0370466	0	0.0283041	0.0567349	0	0	0.0731764	0	0.364715	0.182852	54334	0	10147.3	82874.7	852640	0	0	0			-24.72	-48.9					24.18	-0.1731	1.2362	10.2883	5.4334
BG-30	2202615	2022-03-31	11:45:00	Reference-Site #2 Forest	80	32525781	5836296	forest	9.58725	0	0	0.0912328	0	0.0161745	0.0160743	0	0	0.0569989	0	0	0	39008.9	0	9800.42	130960	820221	0	0	0			-23.84	-63.1		-23.74	-57.9667		39.26	-1.5474	1.3264	6.26316	3.90089
BG-31	2202616	2022-03-31	11:50:00	Reference-Site #2 Forest	80	32525791	5836296	forest	4.75425	0	0	0.0473011	0	0	0	0	0	0.0714876	0	0	0	30269.9	0	9508.93	164487	795730	0	0	0			-23.56	-57.7					34.14	-0.7573	2.2769	4.83765	3.02699
BG-32	2202617	2022-03-31	11:55:00	Reference-Site #2 Forest	80	32525771	5836296	forest	5.68246	0	0	0	0	0	0	0	0	0.0779377	0	0	0	18237.3	0	9351.97	186307	786098	0	0	0			-23.82	-53.1					29.28	-0.4319	1.5792	4.21936	1.82373
BG-35	2203653	2022-04-20	09:50:00	Rodewald WA-272	32	3.25257e+07	5.83637e+06	peat	165528	0.537969	0.143415	4.151	0.0475986	1.35897	4.1973	0	0	0.246832	0.0652578	5.42929	2.4311	71081.8	0	8884.93	74242.2	680205	39.0496	0	0			-21.03	-67.94	-330.13	-14.8971	-58.42	-338.029	46.91	-0.2579	0.9555	9.16197	7.10818
BG-36	2203654	2022-04-20	09:55:00	Rodewald WA-272	45	3.25257e+07	5.83638e+06	peat	453392	2.78321	0.0795441	2.63149	0	0.178756	0.54849	0	0	0.221215	0	0.149088	0.174096	267100	0	3906	2594.61	273000	0	0	0			-14.6	-54.89	-345.41				40.29	0.3889	5.4801	105.218	26.71
BG-37	2203655	2022-04-20	10:00:00	Rodewald WA-272	57	3.25257e+07	5.83637e+06	peat	156327	0.971173	0.0672722	0.974328	0.0638788	0.0499826	0.202314	0	0	0.149341	0	0.0769899	0.0939665	219734	0	7499.48	8097.69	608339	0	0	0			-20.49	-52.16	-352.17				31.67	0	2.3727	75.125	21.9734
BG-38	2203656	2022-04-20	10:10:00	Rodewald WA-272	35	3.25257e+07	5.83637e+06	peat	525852	7.56822	0.0983236	5.21565	0.0576164	0.266236	0.79984	0	0	0.152092	0	0.199587	0.262669	225180	0	3301.09	19056	226595	0	0	0			-16.16	-56.76	-344.94				40.6	-0.2867	1.2086	11.8911	22.518
BG-39	2203657	2022-04-20	10:15:00	Rodewald WA-272	48	3.25257e+07	5.83638e+06	peat	371946	2.67467	0.116295	2.00769	0.0624155	0.114162	0.546935	0	0	0.134451	0	0.111075	0.118029	188282	0	4749.65	77508.9	357507	0	0	0			-15.14	-57.09	-343				41.95	0.6774	1.5911	4.61246	18.8282
BG-40	2203658	2022-04-20	12:25:00	Rodewald WA-272	40	3.25257e+07	5.83637e+06	peat	558557	2.24052	0.0725256	1.55451	0.0168499	0.140886	0.448183	0	0	0.244258	0	0.355983	0.193225	297715	0	1975.79	16115.2	125632	0	0	0			-9.52	-59.78	-324.1				50.26	160.069	4.8166	7.79589	29.7715
BG-41	2203659	2022-04-20	12:30:00	Rodewald WA-272	28	3.25257e+07	5.83639e+06	peat	406827	1.42527	0	1.18417	0	0.0826509	0.164175	0	0	0.178856	0	0.103623	0.134708	160864	0	4819.61	73245.7	354240	0	0	0			-7.34	-60.32	-326.45				52.98	140.246	3.7432	4.83633	16.0864
BG-42	2203660	2022-04-20	11:50:00	Reference-Site #3 peat	10	32525634	5836383	peat	67173.3	0.103253	0.0305595	0.129522	0	0.0603063	0	0	0	0.13781	0	0.0447987	0.0107105	68341	0	9501.93	96526.3	758457	0	0	0			-21.06	-70.95	-303.16	-12.1067	-64.9267	-306.873	49.89	-0.1895	0.9342	7.85752	6.8341
BG-43	2203661	2022-04-20	12:00:00	Reference-Site #3 peat	10	32525634	5836393	peat	241686	0.610661	0.0739512	0.399841	0.0184266	0.0353111	0.0605411	0	0	0.160458	0	0.0568599	0.139969	104581	0	6953.18	111249	535529	0	0	0			-4.68	-66.73	-316.49				62.05	273.803	3.0302	4.81378	10.4581
BG-44	2203662	2022-04-20	12:05:00	Reference-Site #3 peat	15	32525634	5836403	peat	236547	0.724159	0.133057	0.896587	0.204176	0.112292	0.0872323	0.0162663	0.0226142	0.136216	0	0.104183	0.133483	147316	0	7049.6	49771.7	559313	0	0	0			-10.58	-57.1	-300.97				46.52	96.1352	2.7178	11.2376	14.7316
BG-45	2203663	2022-04-21	09:15:00	Rodewald WA-275	55	32525931	5836302	meadow	9232.83	0.134005	0.271361	0.449853	0	0.0790307	0.0829176	0	0	0.170445	0	0.198658	0.157358	92859.2	0	9875.16	21353.3	866678	0	0	0	1964.07	708	-23.19	-87.55	-330.62	-23.576	-85.356	-222.82	64.36	-0.8868	4.5835	40.5876	9.28592
BG-46	2203664	2022-04-21	09:26:00	Rodewald WA-275	50	32525926	5836307	meadow	597.223	0.0247377	0.0519046	0.064009	0	0	0	0	0	0.165053	0	0.0256787	0.0322811	45829.3	0	9677.42	142048	801847	0	0	0			-23.89	-97.53					73.64	-0.4171	6.1856	5.6449	4.58293
BG-47	2203665	2022-04-21	09:30:00	Rodewald WA-275	50	32525936	5836307	meadow	4205.76	0.156354	0.0455251	0.306596	0	0.0343993	0.0408071	0	0	0.231287	0	0.0720336	0.0641339	91397.3	0	10059	43321.1	851016	0	0	0			-23.4	-83.86	-180.57				60.46	-0.5881	10.2579	19.6444	9.13973
BG-48	2203666	2022-04-21	09:35:00	Rodewald WA-275	40	32525936	5836297	meadow	46.0226	0	0	0	0	0	0	0	0	0.241363	0	0	0	12118.6	0	9506.45	197755	780573	0	0	0			-24.19	-66.47					42.28	-0.3285	11.6643	3.94717	1.21186
BG-49	2203667	2022-04-21	09:40:00	Rodewald WA-275	43	32525926	5836297	meadow	4394.61	0.0471758	0.0870894	0.109116	0	0	0.0199985	0	0	0.283735	0	0.0409429	0.0750158	68455.3	0	10034	80140.4	836975	0	0	0			-23.21	-91.37	-157.27				68.16	-0.0083	4.8405	10.4439	6.84553
BG-50	2203668	2022-04-21	11:50:00	Reference-Site #4 meadow	52	32525916	5836359	meadow	4771.75	0.0895194	0.0567953	0.239646	0.0282496	0.0288668	0.0491418	0	0	0.25981	0	0.101246	0.0822742	64905.9	0	10168.4	63028.4	857124	0	0	0			-23.69	-102.6	-202.66	-23.41	-99.085	-181.795	78.91	-0.0995	10.3116	13.599	6.49059
BG-51	2203669	2022-04-21	12:20:00	Reference-Site #4 meadow	48	32525926	5836349	meadow	4161.42	0.0594393	0.0462193	0.0962948	0	0	0	0	0	0.20035	0	0.029371	0.045334	28654.7	0	9861.78	143588	813734	0	0	0			-23.13	-95.57	-160.93				72.44	-0.0764	11.2436	5.66715	2.86547
BG-52	2203842	2022-04-27	10:00:00	Rodewald WA-254	66	32525498	5836366	peat	242969	0.472929	0.0970338	0.89313	0	0.0676151	0.0648392	0	0	0.357956	0	0.0628354	0.0815175	113297	0	6740.17	112749	524242	0	0	0	315380	281985	-10.92	-78.99	-329.5	-13.008	-66.084	-332.12	68.07	-0.7295	2.3305	4.64962	11.3297
BG-53	2203843	2022-04-27	10:05:00	Rodewald WA-254	55	32525503	5836361	peat	243609	0.818023	0.0514904	0.832086	0	0.108965	0.0936296	0	0	0.354103	0	0.145716	0.0681529	132730	0	6033.85	115632	501992	0	0	0			-9.34	-62.47	-330.6				53.13	6.8348	1.2687	4.34131	13.273
BG-54	2203844	2022-04-27	10:25:00	Rodewald WA-254	52	32525503	5836371	peat	450894	2.13481	0.0760159	1.11564	0	0.0882232	0.297155	0	0	0.353871	0	0.362687	0.308237	151665	0	5392.05	15844.5	376199	0	0	0			-18.33	-62.59	-322.4				44.26	-0.8947	3.1426	23.7432	15.1665
BG-55	2203845	2022-04-27	10:30:00	Rodewald WA-254	53	32525493	5836371	peat	187082	0.482443	0.0451215	0.731153	0	0	0	0	0	0.318692	0	0.0447545	0.0843491	103118	0	7741.92	85956.5	616099	0	0	0			-16.28	-68.86	-333.1				52.58	-1.4243	3.1104	7.16757	10.3118
BG-56	2203846	2022-04-27	10:36:00	Rodewald WA-254	50	32525493	5836361	peat	307004	0.51706	0.0637367	0.870418	0	0.0637997	0.0441301	0	0	0.410613	0	0.141007	0.112586	140489	0	5514.91	99735.3	447254	0	0	0			-10.17	-57.51	-345				47.34	-1.7826	3.4942	4.48441	14.0489
BG-57	2203847	2022-04-27	13:11:00	Reference-Site #3 peat	20	32525634	5836393	peat	281985	0.879855	0.061008	0.495743	0	0.0834002	0.038529	0	0	0.231446	0	0.0611835	0.0725686	122492	0	6279.28	96596.4	492645	0	0	0			-9.63	-59.73	-324.4	-7.98	-63.0933	-316.333	50.1	190.426	1.6607	5.10003	12.2492
BG-58	2203848	2022-04-27	13:20:00	Reference-Site #3 peat	20	32525634	5836383	peat	600808	1.16042	0.106519	0.969621	0	0.266693	0.0597275	0	0	0.32918	0	0.215169	0.155201	168643	0	3644.18	7241.8	219659	0	0	0			-4.76	-66.54	-314.3				61.78	-0.2821	0.8087	30.332	16.8643
BG-59	2203849	2022-04-27	13:35:00	Reference-Site #3 peat	20	32525634	5836403	peat	226934	0.599623	0.0281871	0.452396	0	0.0910559	0	0	0	0.278161	0	0.0779996	0.0388146	85122.3	0	6869.39	131453	549619	0	0	0			-9.55	-63.01	-310.3				53.46	41.0593	1.8469	4.18112	8.51223
BG-64	2203854	2022-04-28	11:15:00	Reference-Site #3 peat	20	32525634	5836393	peat	515269	0.971342	0.0255168	0.891209	0	0.203996	0.0710757	0	0	0.241905	0	0.152387	0.119611	148058	0	4588.17	32510.7	299572	0	0	0			-3.91	-64.07	-311.14	-10.32	-65.91	-304.135	60.16	190.426	1.6607	9.21456	14.8058
BG-65	2203855	2022-04-28	11:25:00	Reference-Site #3 peat	20	32525634	5836383	peat	351684	0.715828	0.0162191	0.732016	0	0.133052	0.0336791	0	0	0.221916	0	0.0927025	0.08245	117922	0	5937.4	78938.5	445516	0	0	0			-8.29	-69.34	-294.3				61.05	-0.2821	0.8087	5.64384	11.7922
BG-66	2203856	2022-04-28	11:35:00	Reference-Site #3 peat	20	32525634	5836403	peat	216312	0.235393	0.0840757	0.569066	0	0.239799	0	0	0	0.291565	0	0.156164	0.0601225	74760.6	0	8709.73	23963.6	676252	0	0	0			-14.93	-72.91	-295.8				57.98	41.0593	1.8469	28.22	7.47606
BG-67	2203857	2022-04-28	12:40:00	Reference-Site #3 peat	20	32525624	5836393	peat	78957	0.451211	0.173234	0.521489	0.135447	0.141002	0.10195	0	0	0.307374	0	0.130318	0.174772	105538	0	9746.99	5093.29	800662	0	0	0			-14.15	-57.32	-315.3				43.17	201.394	1.8744	157.2	10.5538
BG-68	2203858	2022-04-28	13:00:00	Rodewald WA-264	75	32525566	5836323	peat	645240	0.822988	0.107024	1.80663	0	0.52628	0.181004	0	0	0.476292	0	0.475866	0.182039	155859	0	2623.63	34694.8	161577	0	0	0			-1.8	-69.99	-278.6	-13.8442	-64.0392	-314.1	68.19	-0.3507	0.3983	4.6571	15.5859
BG-69	2203859	2022-04-28	13:25:00	Rodewald WA-264	20	32525561	5836328	peat	453398	0.927316	0.134735	0.708888	0	0.070501	0.0821133	0	0	0.304963	0	0.107989	0.114093	232721	0	3754.38	31287.2	278837	0	0	0			-7.77	-57.35	-329.3				49.58	-1.2551	3.0129	8.91219	23.2721
BG-70	2203860	2022-04-28	13:05:00	Rodewald WA-264	20	32525571	5836328	peat	367736	1.09944	0.126466	0.996459	0	0.142308	0.187381	0	0	0.304756	0	0.113948	0.140645	190886	0	5162.82	44566.4	391645	0	0	0			-10.48	-56.39	-336.8				45.91	-0.5324	3.6834	8.78791	19.0886
BG-71	2203861	2022-04-28	13:10:00	Rodewald WA-264	20	32525571	5836318	peat	538503	2.96162	0.112974	1.61838	0	0.114355	0.269314	0	0	0.288292	0	0.231308	0.288475	305973	0	2135.94	10137.2	143245	0	0	0			-9.43	-55.81	-335.2				46.38	-0.1058	1.0417	14.1306	30.5973
BG-72	2203862	2022-04-28	13:15:00	Rodewald WA-264	20	32525561	5836318	peat	594045	1.74137	0.0737739	0.948488	0.0337753	0.0797438	0.12711	0	0	0.217617	0	0.155602	0.198975	333044	0	1165.17	5382.02	66359.9	0	0	0			-6.89	-56.34	-333.4				49.45	0.1407	1.0592	12.3299	33.3044
BG-73	2203863	2022-04-28	13:20:00	Rodewald WA-264	20	32525561	5836308	peat	624980	1.75212	0.0762579	0.946032	0	0.112715	0.0836617	0	0	0.404076	0	0.132413	0.155813	288687	0	1182.5	13976	71170	0	0	0			-4.7	-59.37	-321.3				54.67	538.398	1.3822	5.09229	28.8687
P1_44	2303376	2023-04-05	13:00:00	Reference-Site #3 peat	30	32525634	5836393	peat	154185	0.205425	0	0.639713	0	0.182141	0.024161	0	0	0.145059	0	0.128811	0.039414	62370.8	0	8869.57	45975.6	728597	0	0	0			-14.92	-73.22	-279	-12.26	-67.872	-300.512	58.3			15.8475	6.23708
P9_05	2303377	2023-04-05	13:10:00	Reference-Site #3 peat	20	32525644	5836403	peat	106.36	0	0	0	0	0	0	0	0	0.0836004	0	0	0	17744.5	0	9261.03	181847	791041	0	0	0			-23.58	-60.35					36.77			4.35005	1.77445
P25_33	2303378	2023-04-05	13:15:00	Reference-Site #3 peat	10	32525642	5836393	peat	269797	0.53176	0	0.57592	0	0.0774077	0.0293832	0	0	0.110348	0	0.0676576	0.0614698	98460.1	0	7342.65	34759.3	589639	0	0	0			-13.36	-64.81	-321.4				51.45			16.9635	9.84601
P5_01	2303379	2023-04-05	13:20:00	Reference-Site #3 peat	15	32525624	5836383	peat	1623.02	0	0	0	0	0	0	0	0	1.83526	0	0	0	10.0851	0	9217.12	205720	783382	43.1536	0	0				-77.63	-298.8				77.63			3.808	0.00100851
P4_29	2303380	2023-04-05	13:25:00	Reference-Site #3 peat	20	32525634	5836383	peat	62327.2	0.085611	0	0.319838	0	0.144153	0.022497	0	0	0.166167	0	0.143456	0.058277	31473.2	0	9769.79	68913.7	827515	0	0	0			-16.51	-76.62	-273.5				60.11			12.008	3.14732
P6_32	2303381	2023-04-05	13:30:00	Reference-Site #3 peat	30	32525624	5836393	peat	68450.8	0.0784144	0	0.26077	0	0.138593	0.0257043	0	0	0.150144	0	0.076905	0.0300896	62296	0	8954.23	115891	744407	0	0	0			-15.01	-74.48	-270.9				59.47			6.42335	6.2296
P20_26	2303382	2023-04-05	14:00:00	Reference-Site #3 peat	30	32525630	5836393	peat	291826	0.828447	0	0.567097	0	0.0459641	0.0271407	0	0	0.197221	0	0.0607571	0.0621384	100995	0	6214.62	111474	489488	0	0	0			-6.96	-59.99	-321.2				53.03			4.39103	10.0995
PK2_02	2303383	2023-04-05	14:30:00	Reference-Site #3 peat	30	32525631	5836390	peat	280025	0.680063	0	0.429354	0	0.0603377	0.0243026	0	0	0.135703	0	0.0496259	0.0661563	92977.1	0	6380.04	114446	506170	0	0	0			-2.51	-64.86	-313.9				62.35			4.42277	9.29771
PK10_04	2303384	2023-04-05	14:35:00	Reference-Site #3 peat	10	32525630	5836387	peat	375439	0.987719	0	0.71006	0	0.136574	0.0809866	0	0	0.229812	0	0.138183	0.158031	129524	0	5502.51	68749.2	420782	0	0	0			-10.2	-65.86	-325.4				55.66			6.12054	12.9524
PK18_15	2303385	2023-04-05	14:40:00	Reference-Site #3 peat	20	32525630	5836388	peat	428650	1.00604	0	0.611345	0	0.0733863	0.0425026	0	0	0.246245	0	0.065651	0.104361	145396	0	4931.93	55938	365081	0	0	0			-7.29	-60.9					53.61			6.52652	14.5396
NT-1	2304693	2023-11-22	10:52:00	Reference-Site #3 peat	15	3.25256e+07	5.83639e+06	peat	202816	0.55	0	0.47	0	0.03	0.05	0	0	0.06	0	0.06	0.07	61846	0	7818.32	108284	619234	0	0	0			-16.04	-60.85	-329.7							5.7186	6.1846
NT-2	2304694	2023-11-22	10:56:00	Reference-Site #3 peat	28	3.25256e+07	5.83638e+06	peat	485436	1.37	0	1.24	0	0.13	0.1	0	0	0.07	0	0.19	0.2	192155	0	4006.6	33303.5	285096	0	0	0			-9.7	-61.84	-326.9							8.56052	19.2155
NT-3	2304695	2023-11-22	10:59:00	Reference-Site #3 peat	19	3.25256e+07	5.83637e+06	peat	274771	0.64	0.07	0.67	0.05	0.1	0.08	0	0	0.07	0	0.15	0.16	120208	0	6636.8	62334.4	536047	0	0	0			-11.1	-64.87	-330.2							8.59954	12.0208
NT-4	2304696	2023-11-22	11:03:00	Reference-Site #3 peat	23	3.25256e+07	5.83636e+06	peat	130408	0.23	0.05	0.36	0	0.06	0.04	0	0	0.08	0	0.11	0.08	84039.6	0	7983.77	110752	666815	0	0	0			-14.45	-65.52	-342.1							6.02082	8.40396
NT-5	2304697	2023-11-22	11:05:00	Reference-Site #3 peat	35	3.25256e+07	5.83635e+06	peat	424250	0.53	0	1.01	0	0.47	0.08	0	0	0.06	0	0.34	0.1	153368	0	5620.58	12234.7	404524	0	0	0			-13.77	-71.85	-313.1							33.0637	15.3368
NW-1	2304698	2023-11-22	12:06:00	Steimbke Ref forest #2	95	32525771	5836306	forest	15.37	0.01	0	0.03	0	0	0	0	0	0.07	0	0	0	28287.7	0	9373.92	167707	794616	0	0	0			-21.95	-84.1								4.73813	2.82877
NW-2	2304699	2023-11-22	12:10:00	Steimbke Ref forest #2	95	32525791	5836306	forest	5.01	0	0	0	0	0	0	0	0	0.06	0	0	0	29164	0	9308.36	173471	788052	0	0	0			-22.31	-59.4								4.54284	2.9164
NW-3	2304700	2023-11-22	12:14:00	Steimbke Ref forest #2	95	32525791	5836286	forest	2.06	0	0	0	0	0	0	0	0	0.05	0	0	0	32498.6	0	9295.97	170852	787351	0	0	0			-22.54	-61.1								4.60837	3.24986
NW-4	2304701	2023-11-22	12:18:00	Steimbke Ref forest #2	95	32525771	5836286	forest	64.09	0.03	0	0.05	0	0	0	0	0	0.08	0	0	0	33035.3	0	9412.15	162526	794962	0	0	0			-22.41	-72.9								4.8913	3.30353
NW-5	2304702	2023-11-22	12:22:00	Steimbke Ref forest #2	70	32525781	5836296	forest	1.28	0	0	0	0	0	0	0	0	0.06	0	0	0	9258.81	0	9280.78	198518	782941	0	0	0			-22.69	-61.5								3.94393	0.925881
NA-1	2304703	2023-11-23	09:08:00	Reference-Site #4 meadow	50	32525916	5836359	meadow	528.59	0.03	0	0.1	0	0	0.03	0	0	0.08	0	0.06	0.06	72098.3	0	9998.83	58958.2	858416	0	0	0			-22.95	-88.36								14.5597	7.20983
NA-2	2304704	2023-11-23	09:10:00	Reference-Site #4 meadow	55	32525926	5836359	meadow	424.87	0.05	0	0.21	0	0	0.05	0	0	0.13	0	0.11	0.11	93520.2	0	10323.8	10448.2	885282	0	0	0			-22.74	-104.81								84.7305	9.35202
NA-3	2304705	2023-11-23	09:20:00	Reference-Site #4 meadow	42	32525926	5836349	meadow	2282.06	0.06	0	0.14	0	0	0.03	0	0	0.07	0	0.07	0.07	49575.2	0	9789.25	108067	830286	0	0	0			-23.45	-98.94	-344							7.6831	4.95752
NA-4	2304706	2023-11-23	11:20:00	Reference-Site #4 meadow	28	32525916	5836349	meadow	708	0.03	0	0.1	0	0	0	0	0	0.08	0	0.04	0.05	58012.5	0	9892.43	84246.9	847140	0	0	0			-22.95	-98.7								10.0554	5.80125
NA-5	2309575	2023-11-23	09:00:00	Reference-Site #4 meadow	60	32525906	5836349	meadow	69.68	0	0	0	0	0	0	0	0	0.03	0	0	0	26878.1	0	9450.93	161413	802188	0	0	0			-23.71	-90.6								4.96978	2.68781
NA-6	2309576	2023-11-23	09:31:00	Reference-Site #4 meadow	56	32525906	5836359	meadow	7895.64	0.03	0	0.07	0	0	0	0	0	0.03	0	0.03	0.04	44859.7	0	9677.43	113822	823745	0	0	0			-21.71	-98.03	-345.8							7.2371	4.48597
NA-7	2309577	2023-11-23	09:34:00	Reference-Site #4 meadow	52	32525906	5836369	meadow	17.86	0.02	0	0	0	0	0	0	0	0.02	0	0	0	38389.3	0	9719.96	117742	834130	0	0	0			-24.88	-71.2								7.08437	3.83893
NA-8	2309578	2023-11-23	09:36:00	Reference-Site #4 meadow	47	32525916	5836369	meadow	22.78	0	0	0	0	0	0	0	0	0.04	0	0	0	7383.34	0	9485.03	177942	805167	0	0	0			-24.64	-60.5								4.52489	0.738334
NA-9	2309579	2023-11-23	09:38:00	Reference-Site #4 meadow	57	32525926	5836369	meadow	4.41	0	0	0	0	0	0	0	0	0.03	0	0	0	8354.21	0	9278.15	200234	782129	0	0	0			-23.32	-56.4								3.90607	0.835421
NA-10	2309580	2023-11-23	10:04:00	Reference-Site #4 meadow, new	55	32525898	5836302	meadow	2316.52	0.03	0	0.08	0	0.04	0.04	0	0	0.09	0	0.06	0.03	38018.2	0	9811.45	112381	837471	0	0	0			-23.65	-90.4	-321.1							7.45204	3.80182
NA-11	2309581	2023-11-23	10:10:00	Reference-Site #4 meadow, new	50	32525908	5836302	meadow	722.74	0.02	0	0.05	0	0	0	0	0	0.07	0	0.02	0.02	26468.7	0	9559.27	151312	811937	0	0	0			-23.18	-96.58								5.36597	2.64687
NA-12	2309582	2023-11-23	10:12:00	Reference-Site #4 meadow, new	54	32525908	5836292	meadow	230.67	0	0	0.04	0	0	0	0	0	0.05	0	0	0	35063.1	0	9766.82	116763	838176	0	0	0			-23.7	-91.98								7.17844	3.50631
NA-13	2309583	2023-11-23	10:14:00	Reference-Site #4 meadow, new	58	32525898	5836292	meadow	2534.11	0	0	0.05	0	0	0	0	0	0.05	0	0.02	0.02	42539.8	0	9659.63	120192	825074	0	0	0			-23.42	-94.87	-326							6.86464	4.25398
NA-14	2309584	2023-11-23	10:16:00	Reference-Site #4 meadow, new	46	32525888	5836292	meadow	7.26	0.02	0	0.03	0	0	0	0	0	0.09	0	0	0	23303.4	0	9661.09	143390	823637	0	0	0			-23.61	-93.3								5.74403	2.33034
NA-15	2309585	2023-11-23	10:19:00	Reference-Site #4 meadow, new	58	32525888	5836302	meadow	3.16	0	0	0	0	0	0	0	0	0.04	0	0	0	19962.9	0	9445.26	168912	801677	0	0	0			-24.01	-68.6								4.74613	1.99629
NA-16	2309586	2023-11-23	10:26:00	Reference-Site #4 meadow, new	29	32525888	5836312	meadow	1.84	0	0	0	0	0	0	0	0	0.04	0	0	0	13805.5	0	9454.82	175389	801349	0	0	0			-23.89	-49.5								4.56898	1.38055
NA-17	2309587	2023-11-23	10:29:00	Reference-Site #4 meadow, new	53	32525898	5836312	meadow	3058.64	0.04	0	0.06	0	0	0	0	0	0.05	0	0.02	0.02	33762.6	0	9610.9	132220	821347	0	0	0			-23.34	-94.07	-327.9							6.21197	3.37626
NA-18	2309588	2023-11-23	10:31:00	Reference-Site #4 meadow, new	53	32525908	5836312	meadow	863.28	0	0	0.05	0	0	0	0	0	0.05	0	0.02	0.03	41537.9	0	9648.69	125080	822788	0	0	81.68			-23.64	-93.65								6.57809	4.15379

## Sheet: Table S2 Flux
Site	Area	Date (UTC)	East	North	Mean CH4 flux [nmol m-2 s-1]	Standardeviation [nmol m-2 s-1]	Coefficient of variation	Mean CO2 flux [µmol m-2 s-1]	Standardeviation [µmol m-2 s-1]	Coefficient of variation	PA mean [kPa]	TS mean [°C]	EC mean [S m-1]	SWC mean [m3 m-3]
WA-211	well	2022-03-09 10:27:00	32525924	5836503	-0.1326	0.1893	-0.398645	1.6818	0.164	0.103709	102.413	4.198	0.009	0.3072
WA-211	well	2022-03-09 10:40:00	32525919	5836508	-0.0081	0.0031	-0.00652826	0.8468	0.033	0.0208682	102.417	3.7753	0.0175	0.5032
WA-211	well	2022-03-09 10:51:00	32525919	5836498	0.004	0.0155	-0.0326413	1.4744	0.1788	0.113068	102.417	4.5519	0.009	0.314
WA-211	well	2022-03-09 11:05:00	32525929	5836498	0.0137	0.007	-0.0147412	2.7225	0.334	0.211212	102.42	4.8651	0.007	0.2537
WA-211	well	2022-03-09 11:16:00	32525929	5836508	-1.2498	0.0113	-0.0237965	2.8917	0.1829	0.11566	102.417	4.9152	0.0052	0.2412
WA-211	well	2022-03-09 11:28:00	32525909	5836518	-0.1736	0.0187	-0.0393801	1.1798	0.0335	0.0211844	102.393	11.7502	0.015	0.4363
WA-211	well	2022-03-09 11:39:00	32525919	5836518	-0.1207	0.0798	-0.16805	1.432	0.0642	0.0405981	102.41	9.9485	0.004	0.1762
WA-211	well	2022-03-09 11:50:00	32525929	5836518	-1.9922	0.0256	-0.0539108	1.948	0.0614	0.0388275	102.397	9.8996	0.008	0.2745
WA-211	well	2022-03-09 12:02:00	32525939	5836518	-2.5709	0.0303	-0.0638084	2.5277	0.1287	0.081386	102.357	13.1121	0.0181	0.2326
WA-211	well	2022-03-09 12:13:00	32525939	5836508	-1.0461	0.3496	-0.736219	2.2408	0.3974	0.251304	102.38	10.4754	0.0093	0.3533
WA-211	well	2022-03-09 12:24:00	32525939	5836498	-0.0685	0.0409	-0.0861309	0.8989	0.0472	0.0298479	102.377	9.6731	0.01	0.3274
WA-211	well	2022-03-09 12:35:00	32525939	5836488	-0.1443	0.0516	-0.108664	0.8223	0.0477	0.030164	102.347	10.2605	0.0071	0.293
WA-211	well	2022-03-09 12:47:00	32525929	5836488	-0.094	0.0789	-0.166155	0.9818	0.1558	0.0985232	102.347	10.3143	0.008	0.3151
WA-211	well	2022-03-09 12:58:00	32525919	5836488	-0.2203	0.0628	-0.13225	1.4092	0.1789	0.113131	102.35	10.6621	0.0137	0.3982
WA-211	well	2022-03-09 13:12:00	32525909	5836488	-0.0427	0.004	-0.00842356	1.197	0.0682	0.0431276	102.34	11.0752	0.0143	0.2967
WA-211	well	2022-03-09 13:26:00	32525909	5836498	-0.0668	0.0199	-0.0419072	0.9333	0.0789	0.049894	102.33	10.455	0.006	0.2156
WA-211	well	2022-03-09 13:37:00	32525909	5836508	-0.1597	0.0486	-0.102346	1.695	0.1276	0.0806904	102.327	10.0502	0.0077	0.2888
WA-211	reference	2022-03-09 14:04:00	32526039	5836416	-0.0419	0.0191	-0.156344	1.3847	0.053	0.0485402	102.303	10.7369	0.0066	0.2177
WA-211	reference	2022-03-09 14:15:00	32526029	5836416	0.0077	0.0138	-0.11296	0.8276	0.0893	0.0817857	102.307	10.1414	0.0059	0.242
WA-211	reference	2022-03-09 14:27:00	32526029	5836406	-0.0052	0.0111	-0.0908595	0.7293	0.0269	0.0246365	102.297	11.3449	0.005	0.2043
WA-211	reference	2022-03-09 14:38:00	32526039	5836406	-0.0928	0.0177	-0.144884	0.5658	0.0635	0.0581567	102.28	10.9943	0.014	0.3669
WA-211	reference	2022-03-09 14:49:00	32526049	5836406	-0.0105	0.0282	-0.230832	2.5797	0.1624	0.148735	102.28	10.3971	0.005	0.2178
WA-211	reference	2022-03-09 15:00:00	32526049	5836416	-0.3759	0.1051	-0.8603	1.0127	0.0409	0.0374584	102.28	10.2318	0.005	0.1977
WA-211	reference	2022-03-09 15:11:00	32526049	5836426	-0.1729	0.116	-0.949523	0.8537	0.0611	0.0559586	102.27	9.9799	0.0054	0.2163
WA-211	reference	2022-03-09 15:22:00	32526039	5836426	-0.3028	0.0243	-0.198909	0.7866	0.0789	0.0722608	102.267	9.2863	0.007	0.2564
WA-211	reference	2022-03-09 15:33:00	32526029	5836426	-0.1052	0.0246	-0.201364	1.0868	0.0416	0.0380995	102.27	8.7936	0.007	0.2644
WA-209	reference	2022-03-10 10:31:29	32526039	5836416	0.0465	0.0188	-0.247731	1.0516	0.1685	0.158497	102.587	8.9255	0.0084	0.2672
WA-209	reference	2022-03-10 10:42:34	32526029	5836416	0.0215	0.0081	-0.106735	0.8729	0.0534	0.0502299	102.633	9.2692	0.0143	0.3552
WA-209	reference	2022-03-10 10:53:44	32526029	5836406	0.0477	0.0134	-0.176574	1.0238	0.0735	0.0691367	102.603	11.141	0.006	0.2362
WA-209	reference	2022-03-10 11:04:38	32526039	5836406	-0.051	0.0454	-0.598243	0.8355	0.0498	0.0468436	102.597	12.7513	0.0146	0.4158
WA-209	reference	2022-03-10 11:15:45	32526049	5836406	0.0319	0.0162	-0.21347	2.2826	0.1196	0.1125	102.583	11.8517	0.0035	0.1352
WA-209	reference	2022-03-10 11:26:47	32526049	5836416	-0.3233	0.024	-0.316252	0.9432	0.0646	0.0607651	102.6	11.0435	0.004	0.1847
WA-209	reference	2022-03-10 11:37:42	32526049	5836426	-0.0629	0.0451	-0.59429	0.7084	0.0429	0.0403533	102.587	11.8592	0.004	0.1681
WA-209	reference	2022-03-10 11:49:05	32526039	5836426	-0.2449	0.0312	-0.411127	0.8722	0.0122	0.0114758	102.57	15.8331	0.0168	0.4484
WA-209	reference	2022-03-10 12:00:17	32526029	5836426	-0.1485	0.0318	-0.419034	0.9778	0.1697	0.159626	102.59	11.6955	0.0108	0.3781
WA-209	well	2022-03-10 12:15:43	32526148	5836399	-2.214	0.6367	-1.80465	1.5303	0.3174	0.209337	102.59	11.3355	0.008	0.249
WA-209	well	2022-03-10 12:28:48	32526153	5836394	0.0177	0.0037	-0.0104872	1.8388	0.4912	0.323964	102.567	12.4381	0.01	0.4014
WA-209	well	2022-03-10 12:40:57	32526143	5836394	-0.61	0.0062	-0.0175731	2.2199	0.0584	0.0385169	102.523	14.7829	0.0069	0.2391
WA-209	well	2022-03-10 12:53:24	32526143	5836404	-1.0892	0.0212	-0.0600887	1.5748	0.0749	0.0493992	102.523	12.3028	0.01	0.236
WA-209	well	2022-03-10 13:04:31	32526133	5836414	-0.0135	0.0097	-0.0274934	1.6922	0.0164	0.0108164	102.5	13.5123	0.0181	0.3835
WA-209	well	2022-03-10 13:15:54	32526143	5836414	-0.1641	0.0145	-0.0410984	0.9292	0.0256	0.0168841	102.5	12.4216	0.007	0.2438
WA-209	well	2022-03-10 13:27:23	32526153	5836414	-0.3572	0.0082	-0.0232419	1.6098	0.0638	0.0420784	102.493	11.9503	0.0057	0.215
WA-209	well	2022-03-10 13:38:57	32526163	5836414	-1.4722	0.0117	-0.0331622	1.8329	0.0724	0.0477504	102.46	15.8282	0.0125	0.377
WA-209	well	2022-03-10 13:51:06	32526163	5836404	-0.8995	0.1316	-0.373003	2.0307	0.1876	0.123729	102.487	14.1388	0.0084	0.2908
WA-209	well	2022-03-10 14:03:59	32526153	5836404	1.5777	0.0558	-0.158158	2.0021	0.1884	0.124257	102.467	11.7424	0.007	0.3205
WA-209	well	2022-03-10 14:17:46	32526163	5836394	-0.3043	0.0141	-0.0399647	1.6062	0.0661	0.0435953	102.447	11.133	0.01	0.3506
WA-209	well	2022-03-10 14:29:54	32526163	5836384	-0.1419	0.0356	-0.100904	1.6578	0.0869	0.0573137	102.453	11.1972	0.0113	0.4149
WA-209	well	2022-03-10 14:43:13	32526153	5836384	-0.1702	0.0746	-0.211444	2.155	0.0719	0.0474206	102.46	10.2811	0.0102	0.2926
WA-209	well	2022-03-10 14:55:02	32526143	5836384	-0.0271	0.0209	-0.0592384	0.2173	0.7229	0.476779	102.443	10.4739	0.0077	0.2822
WA-209	well	2022-03-10 15:06:06	32526133	5836384	-0.1141	0.0392	-0.111107	1.058	0.1264	0.0833653	102.433	10.3693	0.006	0.2203
WA-209	well	2022-03-10 15:17:23	32526133	5836394	0.0048	0.0013	-0.00368468	1.065	0.0486	0.0320534	102.433	9.8804	0.005	0.1976
WA-209	well	2022-03-10 15:30:09	32526133	5836404	-0.0207	0.0159	-0.0450665	0.7557	0.0328	0.0216328	102.43	9.0927	0.0087	0.2313
WA-273	well	2022-03-30 09:08:55	32525761	5836338	-1.2223	0.0055	-0.00419245	3.3351	0.0545	0.0263056	100.477	6.6037	0.0194	0.3731
WA-273	well	2022-03-30 09:20:45	32525756	5836343	-0.6785	0.0442	-0.033692	1.8129	0.1902	0.0918042	100.46	7.4619	0.0067	0.1743
WA-273	well	2022-03-30 09:30:55	32525766	5836343	-0.7769	0.0183	-0.0139494	1.7167	0.0062	0.00299257	100.467	7.5814	0.0167	0.3031
WA-273	well	2022-03-30 09:42:35	32525766	5836333	-2.4928	0.0375	-0.0285849	2.1882	0.0366	0.0176658	100.47	6.4472	0.006	0.1636
WA-273	well	2022-03-30 09:54:03	32525756	5836333	-0.0115	0.0553	-0.0421532	1.8096	0.132	0.0637127	100.46	6.9306	0.0038	0.0947
WA-273	well	2022-03-30 10:04:49	32525746	5836333	-1.5882	0.0504	-0.0384181	1.4906	0.1364	0.0658365	100.457	6.8227	0.0106	0.2811
WA-273	well	2022-03-30 10:15:31	32525746	5836343	-2.2126	0.018	-0.0137207	2.1942	0.1412	0.0681533	100.443	6.5347	0.0061	0.1754
WA-273	well	2022-03-30 10:25:52	32525746	5836353	-0.8791	0.0092	-0.00701282	2.3066	0.0262	0.012646	100.44	7.1679	0.006	0.1722
WA-273	well	2022-03-30 10:37:42	32525756	5836353	-0.789	0.0288	-0.0219532	2.1421	0.0965	0.0465779	100.42	8.1908	0.003	0.1097
WA-273	well	2022-03-30 10:48:41	32525766	5836353	-0.3583	0.0104	-0.00792754	1.6786	0.1184	0.0571484	100.417	7.1253	0.0077	0.2274
WA-273	well	2022-03-30 10:59:04	32525776	5836353	-2.0621	0.0081	-0.00617433	1.711	0.0798	0.0385172	100.417	6.5851	0.0048	0.1312
WA-273	well	2022-03-30 11:10:13	32525776	5836343	-1.2518	0.0209	-0.0159313	2.7012	0.1532	0.0739454	100.4	7.708	0.0117	0.2358
WA-273	well	2022-03-30 11:25:33	32525776	5836333	-1.5015	0.0387	-0.0294996	2.9908	0.2087	0.100734	100.38	7.2695	0.0065	0.1705
WA-273	well	2022-03-30 11:36:30	32525776	5836323	-4.3695	0.1837	-0.140028	3.1981	0.3087	0.149001	100.39	7.2663	0.0033	0.0996
WA-273	well	2022-03-30 11:48:28	32525766	5836323	-1.6549	0.0145	-0.0110528	2.0492	0.109	0.0526113	100.39	6.7234	0.008	0.229
WA-273	well	2022-03-30 12:00:08	32525756	5836323	-0.1559	0.0105	-0.00800377	0.8018	0.0321	0.0154938	100.383	6.4905	0.0038	0.1386
WA-273	well	2022-03-30 12:11:29	32525746	5836323	-0.2971	0.0753	-0.0573984	1.0939	0.2469	0.119172	100.38	6.8469	0.0062	0.2272
WA-273	reference	2022-03-30 12:27:51	32525781	5836296	-1.3546	0.0282	-0.0346901	1.2148	0.0519	0.025722	100.363	6.2536	0.01	0.263
WA-273	reference	2022-03-30 12:47:41	32525771	5836306	-0.5449	0.0029	-0.00356742	1.6913	0.0529	0.0262176	100.333	6.9083	0.0046	0.1498
WA-273	reference	2022-03-30 12:59:16	32525781	5836306	-2.1237	0.0324	-0.0398567	2.1582	0.1267	0.0627935	100.32	7.4581	0.0077	0.2208
WA-273	reference	2022-03-30 13:10:33	32525791	5836306	-0.8854	0.0136	-0.01673	2.1481	0.0757	0.0375175	100.323	8.0272	0.005	0.1345
WA-273	reference	2022-03-30 13:21:51	32525791	5836296	-0.8554	0.0424	-0.0521581	2.4341	0.2643	0.130989	100.323	7.412	0.0137	0.2749
WA-273	reference	2022-03-30 13:33:33	32525791	5836286	-1.0698	0.031	-0.0381345	3.1342	0.0554	0.0274567	100.307	6.7222	0.008	0.225
WA-273	reference	2022-03-30 13:44:29	32525781	5836286	0.1822	0.0149	-0.0183292	1.3183	0.0577	0.0285966	100.29	7.2857	0.0095	0.2711
WA-273	reference	2022-03-30 13:55:33	32525771	5836286	0.1483	0.0213	-0.0262021	2.0428	0.2608	0.129254	100.28	7.5705	0.007	0.225
WA-274	well	2022-03-31 07:25:00	3.25258e+07	5.8363e+06	-0.1731	0.0478	-0.0311015	1.2362	0.1317	0.0723174	100.07	1.5892	0.0022	0.0962
WA-274	well	2022-03-31 07:36:00	3.25258e+07	5.8363e+06	-0.8672	0.0303	-0.0197149	1.9262	0.0977	0.0536477	100.067	1.9749	0.004	0.1206
WA-274	well	2022-03-31 07:47:00	3.25258e+07	5.8363e+06	-1.7685	0.0078	-0.00507513	1.713	0.0322	0.0176812	100.08	2.2716	0.0114	0.293
WA-274	well	2022-03-31 08:00:00	3.25258e+07	5.83629e+06	-2.393	0.0258	-0.016787	1.1566	0.0374	0.0205366	100.08	2.269	0.003	0.1074
WA-274	well	2022-03-31 08:12:00	3.25258e+07	5.83629e+06	-2.0199	0.0342	-0.0222525	1.0283	0.0159	0.0087308	100.08	2.7985	0.0143	0.343
WA-274	well	2022-03-31 08:29:00	3.25258e+07	5.83631e+06	-1.1322	0.0746	-0.0485391	2.5093	0.1818	0.0998276	100.08	3.6341	0.0132	0.3287
WA-274	well	2022-03-31 08:39:00	3.25258e+07	5.83631e+06	-1.1411	0.3747	-0.243802	2.1425	0.4189	0.230021	100.09	3.5305	0.0029	0.1014
WA-274	well	2022-03-31 08:50:00	3.25258e+07	5.83631e+06	-0.9048	0.2696	-0.175417	1.9504	0.2146	0.117838	100.087	3.8621	0.0149	0.3592
WA-274	well	2022-03-31 09:02:00	3.25258e+07	5.83631e+06	-1.8864	0.4224	-0.274838	5.588	0.4238	0.232712	100.12	3.2035	0.007	0.1315
WA-274	well	2022-03-31 09:12:00	3.25258e+07	5.8363e+06	-3.4622	0.1744	-0.113475	1.494	0.1175	0.0645201	100.107	3.3311	0.0098	0.2767
WA-274	well	2022-03-31 09:24:00	3.25258e+07	5.83629e+06	-1.1936	0.0278	-0.0180883	1.1255	0.0721	0.0395906	0.6	3.5506	0.008	0.2524
WA-274	well	2022-03-31 09:35:00	3.25258e+07	5.83628e+06	-0.0824	0.0183	-0.011907	0.9919	0.0564	0.0309696	100.117	3.3357	0.004	0.1632
WA-274	well	2022-03-31 09:46:00	3.25258e+07	5.83628e+06	-3.7238	2.235	-1.45422	1.2458	0.6023	0.330727	100.12	3.263	0.0058	0.1767
WA-274	well	2022-03-31 09:56:00	3.25258e+07	5.83628e+06	-3.1994	0.0072	-0.00468474	1.9487	0.0163	0.00895044	100.113	3.4764	0.006	0.1796
WA-274	well	2022-03-31 10:09:00	3.25258e+07	5.83628e+06	-0.4395	0.0043	-0.00279783	1.4324	0.0846	0.0464544	100.097	4.3028	0.0112	0.3
WA-274	well	2022-03-31 10:24:00	3.25258e+07	5.83628e+06	-1.5618	0.046	-0.0299303	2.4388	0.2295	0.12602	100.08	5.9684	0.0168	0.3636
WA-274	well	2022-03-31 10:36:00	3.25258e+07	5.83629e+06	-0.8666	0.0397	-0.0258311	1.72	0.221	0.121353	100.083	7.6207	0.003	0.1093
WA-274	well	2022-03-31 10:48:00	3.25258e+07	5.8363e+06	-0.8488	0.0112	-0.00728737	1.1329	0.051	0.0280045	100.08	5.7928	0.0086	0.2417
WA-274	reference	2022-03-31 11:24:00	32525781	5836296	-1.5474	0.0465	-0.0903419	1.3264	0.126	0.0910105	100.073	6.9088	0.0069	0.1865
WA-274	reference	2022-03-31 11:36:00	32525771	5836306	-0.4319	0.0244	-0.0474052	1.5792	0.087	0.0628406	100.073	8.4811	0.0055	0.1512
WA-274	reference	2022-03-31 11:46:00	32525781	5836306	-1.2691	0.0188	-0.0365253	1.3002	0.1057	0.0763477	100.077	8.5971	0.004	0.1249
WA-274	reference	2022-03-31 11:57:00	32525791	5836306	-0.8069	0.0095	-0.018457	2.1697	0.0829	0.0598791	100.08	7.9006	0.0117	0.296
WA-274	reference	2022-03-31 12:09:00	32525791	5836296	-0.7573	0.0177	-0.0343882	2.2769	0.0877	0.0633462	100.083	7.6645	0.0115	0.1996
WA-274	reference	2022-03-31 12:21:00	32525791	5836286	-0.0292	0.0036	-0.00699421	0.7582	0.0813	0.0587234	100.08	7.0199	0.006	0.1724
WA-274	reference	2022-03-31 12:33:00	32525781	5836286	0.1047	0.0122	-0.0237026	0.9564	0.0402	0.0290367	100.07	6.2038	0.0048	0.1614
WA-274	reference	2022-03-31 12:45:00	32525771	5836286	0.0884	0.022	-0.0427424	1.2205	0.1867	0.134854	100.06	8.4476	0.008	0.2455
WA-274	reference	2022-03-31 12:56:00	32525771	5836296	0.0163	0.0036	-0.00699421	0.8726	0.06	0.0433383	100.07	7.6385	0.003	0.1069
WA-275	well	2022-04-21 08:18:08	32525931	5836302	-0.8868	0.0031	-0.0156677	4.5835	0.0399	0.00442132	101.36	9.134	0.0109	0.3613
WA-275	well	2022-04-21 08:28:18	32525926	5836307	-0.4171	0.0312	-0.157688	6.1856	0.5406	0.0599039	101.373	9.4035	0.0296	0.5448
WA-275	well	2022-04-21 08:38:25	32525936	5836307	-0.5881	0.0171	-0.0864253	10.2579	0.2337	0.0258963	101.357	9.0937	0.0189	0.4574
WA-275	well	2022-04-21 08:48:49	32525936	5836297	-0.3285	0.006	-0.0303247	11.6643	0.5872	0.0650677	101.37	8.3015	0.0276	0.456
WA-275	well	2022-04-21 08:59:16	32525926	5836297	-0.0083	0.0068	-0.0343679	4.8405	0.1147	0.0127099	101.367	9.1778	0.0228	0.4434
WA-275	well	2022-04-21 09:13:21	32525916	5836297	-0.2016	0.0404	-0.204186	7.1456	0.3601	0.0399027	101.35	9.0418	0.0221	0.5009
WA-275	well	2022-04-21 09:24:59	32525916	5836307	-0.0562	0.018	-0.090974	7.4517	0.3896	0.0431716	101.35	9.0996	0.0247	0.5106
WA-275	well	2022-04-21 09:35:53	32525916	5836317	-0.2535	0.0177	-0.0894577	10.8398	0.1268	0.0140507	101.35	9.2914	0.0302	0.5985
WA-275	well	2022-04-21 09:46:23	32525926	5836317	-1.163	0.0086	-0.0434653	8.1595	0.1641	0.0181839	101.357	9.418	0.0265	0.431
WA-275	well	2022-04-21 09:56:53	32525936	5836317	-0.2325	0.0023	-0.0116244	7.7214	0.3001	0.0332541	101.353	9.5166	0.0344	0.5378
WA-275	well	2022-04-21 10:07:43	32525946	5836317	-0.0797	0.0322	-0.162742	10.4204	0.1935	0.0214418	101.343	8.9463	0.0269	0.55
WA-275	well	2022-04-21 10:18:41	32525946	5836307	-0.0335	0.005	-0.0252705	10.1913	0.277	0.0306944	101.343	8.4109	0.0166	0.3093
WA-275	well	2022-04-21 10:29:58	32525946	5836297	-0.3249	0.0044	-0.0222381	13.2843	0.0675	0.00747968	101.33	8.9889	0.0305	0.4879
WA-275	well	2022-04-21 10:44:50	32525946	5836287	0.6859	0.0895	-0.452343	9.2765	0.7	0.0775671	101.313	9.309	0.0311	0.513
WA-275	well	2022-04-21 10:56:39	32525936	5836287	0.1497	0.0112	-0.056606	10.1083	0.1193	0.0132196	101.297	9.2653	0.0223	0.3834
WA-275	well	2022-04-21 11:07:18	32525926	5836287	0.2986	0.009	-0.045487	10.386	0.9879	0.109469	101.283	9.1791	0.021	0.4154
WA-275	well	2022-04-21 11:21:50	32525916	5836287	0.0759	0.0169	-0.0854144	10.899	0.5397	0.0598042	101.29	9.3403	0.0241	0.4143
WA-275	reference	2022-04-21 11:35:57	32525916	5836359	-0.0995	0.0254	-0.257143	10.3116	0.8779	0.111987	101.28	9.3492	0.0233	0.4518
WA-275	reference	2022-04-21 11:46:55	32525926	5836359	-0.0404	0.0092	-0.0931384	7.5498	0.2754	0.0351306	101.277	9.0267	0.022	0.4079
WA-275	reference	2022-04-21 11:57:11	32525926	5836349	-0.0764	0.0204	-0.206524	11.2436	0.4257	0.0543032	101.27	8.5661	0.0283	0.548
WA-275	reference	2022-04-21 12:07:54	32525916	5836349	-0.1398	0.0233	-0.235883	12.2075	0.8324	0.106183	101.253	9.2784	0.0285	0.5052
WA-275	reference	2022-04-21 12:17:57	32525906	5836349	-0.0778	0.0316	-0.31991	4.933	0.1115	0.0142232	101.25	9.1561	0.0259	0.489
WA-275	reference	2022-04-21 12:28:26	32525906	5836359	-0.1716	0.0374	-0.378628	2.3009	0.0914	0.0116592	101.243	8.8636	0.0297	0.5314
WA-275	reference	2022-04-21 12:39:12	32525906	5836369	-0.1113	0.032	-0.32396	6.2062	0.3433	0.0437921	101.23	9.9408	0.0269	0.4701
WA-275	reference	2022-04-21 12:49:35	32525916	5836369	-0.1005	0.0376	-0.380652	7.9337	0.1829	0.0233311	101.22	10.3152	0.02	0.2986
WA-275	reference	2022-04-21 13:00:34	32525926	5836369	-0.0717	0.0329	-0.333071	7.8675	0.2739	0.0349393	101.21	10.2064	0.0203	0.3583
WA-272	well	2022-04-20 08:42:45	3.25257e+07	5.83637e+06	-0.2579	0.0032	0.000126084	0.9555	0.0611	0.0253432	101.787	10.864	0.0067	0.2274
WA-272	well	2022-04-20 08:52:57	3.25257e+07	5.83638e+06	0.3889	0.005	0.000197007	5.4801	0.1138	0.0472023	101.78	10.8575	0.0049	0.168
WA-272	well	2022-04-20 09:03:45	3.25257e+07	5.83638e+06	0.6774	0.0438	0.00172578	1.5911	0.1022	0.0423908	101.787	9.5176	0.0102	0.3117
WA-272	well	2022-04-20 09:14:00	3.25257e+07	5.83637e+06	-0.2867	0.016	0.000630421	1.2086	0.0751	0.0311502	101.79	8.8444	0.007	0.2713
WA-272	well	2022-04-20 09:25:38	3.25257e+07	5.83637e+06	0	0.006	0.000236408	2.3727	0.0368	0.015264	101.757	9.9758	0.0116	0.3098
WA-272	well	2022-04-20 09:37:05	3.25257e+07	5.83637e+06	160.069	10.6765	0.420668	4.8166	0.1307	0.0542121	101.757	10.0616	0.006	0.1922
WA-272	well	2022-04-20 09:48:42	3.25257e+07	5.83638e+06	40.8066	1.0887	0.0428962	4.0815	0.0137	0.00568253	101.763	10.6794	0.012	0.306
WA-272	well	2022-04-20 10:00:10	3.25257e+07	5.83639e+06	86.2021	6.8297	0.269099	2.2008	0.0689	0.0285785	101.75	10.0392	0.0139	0.3121
WA-272	well	2022-04-20 10:11:38	3.25257e+07	5.83639e+06	140.246	28.162	1.10962	3.7432	0.3795	0.15741	101.73	9.6056	0.0114	0.3004
WA-272	well	2022-04-20 10:22:52	3.25257e+07	5.83639e+06	-0.3401	0.2239	0.00882196	1.4228	0.0653	0.0270853	101.75	9.7494	0.0175	0.4592
WA-272	well	2022-04-20 10:34:38	3.25257e+07	5.83639e+06	-0.1662	0.0469	0.00184792	0.7655	0.061	0.0253018	101.717	8.8069	0.0117	0.3767
WA-272	well	2022-04-20 10:45:34	3.25257e+07	5836377	2.6031	0.1273	0.00501579	4.2365	0.1347	0.0558713	101.683	10.2345	0.0076	0.2455
WA-272	well	2022-04-20 10:56:25	3.25257e+07	5.83637e+06	2.088	0.1219	0.00480302	1.8785	0.0835	0.0346344	101.667	9.6147	0.0157	0.3147
WA-272	well	2022-04-20 11:08:20	3.25257e+07	5.83636e+06	-0.1972	0.0547	0.00215525	0.848	0.0624	0.0258825	101.64	8.9748	0.0119	0.3789
WA-272	well	2022-04-20 11:20:46	3.25257e+07	5.83636e+06	0.3089	0.0285	0.00112294	1.0301	0.1488	0.0617197	101.617	8.3085	0.008	0.2804
WA-272	well	2022-04-20 11:32:03	3.25257e+07	5.83636e+06	-0.512	0.0139	0.000547679	2.1847	0.0631	0.0261728	101.6	9.2094	0.0086	0.2761
WA-272	well	2022-04-20 11:45:26	3.25257e+07	5.83636e+06	-0.1726	0.0112	0.000441295	2.1691	0.0271	0.0112406	101.59	9.2083	0.0178	0.4073
WA-272	reference	2022-04-20 12:05:45	32525634	5836393	273.803	7.1253	0.142306	3.0302	0.1219	0.0753358	101.56	8.615	0.0155	0.3479
WA-272	reference	2022-04-20 12:16:51	32525644	5836393	15.4245	0.2611	0.00521469	1.4207	0.02	0.0123603	101.577	9.609	0.0147	0.3374
WA-272	reference	2022-04-20 12:41:45	32525644	5836383	0.2057	0.0654	0.00130617	1.1176	0.0745	0.046042	101.537	8.8199	0.0102	0.3284
WA-272	reference	2022-04-20 12:55:51	32525634	5836383	-0.1895	0.0619	0.00123627	0.9342	0.0245	0.0151413	101.547	8.6295	0.0208	0.5343
WA-272	reference	2022-04-20 13:09:15	32525624	5836383	0.0165	0.0045	8.9874e-05	0.4387	0.0353	0.0218159	101.513	8.0697	0.0163	0.5253
WA-272	reference	2022-04-20 13:21:59	32525624	5836393	31.1913	0.6575	0.0131316	1.6712	0.1222	0.0755212	101.51	8.5261	0.0199	0.4533
WA-272	reference	2022-04-20 13:34:22	32525624	5836403	1.1572	0.48	0.00958656	1.4281	0.042	0.0259565	101.497	8.2938	0.009	0.2395
WA-272	reference	2022-04-20 13:49:16	32525634	5836403	96.1352	19.3875	0.387207	2.7178	0.3544	0.219024	101.483	8.8219	0.0227	0.4475
WA-272	reference	2022-04-20 14:00:15	32525644	5836403	32.8873	1.114	0.0222488	1.8043	0.0963	0.0595147	101.47	8.9269	0.0214	0.4849
WA-254	well	2022-04-27 09:11:17	32525498	5836366	-0.7295	0.0718	0.289338	2.3305	0.6194	0.3495	102.483	10.1051	0.0312	0.5663
WA-254	well	2022-04-27 09:22:05	32525493	5836371	-1.4243	0.032	0.128953	3.1104	0.0511	0.0288335	102.507	10.3626	0.0103	0.2384
WA-254	well	2022-04-27 09:33:48	32525503	5836371	-0.8947	0.0085	0.0342531	3.1426	0.1506	0.0849769	102.513	10.2544	0.0122	0.3511
WA-254	well	2022-04-27 09:44:40	32525503	5836361	6.8348	2.1418	8.63097	1.2687	0.0354	0.0199746	102.487	9.2237	0.0164	0.4124
WA-254	well	2022-04-27 09:56:50	32525493	5836361	-1.7826	0.0341	0.137415	3.4942	0.1045	0.0589647	102.487	9.5221	0.016	0.4075
WA-254	well	2022-04-27 10:09:42	32525483	5836361	0.0074	0.0014	0.00564168	0.9536	0.0283	0.0159684	102.487	8.6583	0.0066	0.2287
WA-254	well	2022-04-27 10:20:18	32525483	5836371	-0.0773	0.066	0.265965	0.5015	0.0942	0.0531529	102.47	9.1584	0.007	0.2297
WA-254	well	2022-04-27 10:32:12	32525483	5836381	0.411	0.1061	0.427559	1.389	0.0563	0.0317676	102.467	9.0982	0.0332	0.7012
WA-254	well	2022-04-27 10:45:14	32525493	5836381	-1.2738	0.1272	0.512587	2.8024	0.1115	0.0629145	102.46	10.7665	0.0108	0.2695
WA-254	well	2022-04-27 10:55:54	32525503	5836381	-0.0515	0.0192	0.0773716	1.1281	0.0477	0.026915	102.46	9.8829	0.0433	0.5856
WA-254	well	2022-04-27 11:07:14	32525513	5836381	-0.0327	0.0051	0.0205518	1.1344	0.0464	0.0261815	102.46	9.3977	0.0315	0.5245
WA-254	well	2022-04-27 11:17:48	32525513	5836371	-2.0295	0.0522	0.210354	3.2515	0.2064	0.116462	102.45	9.9578	0.0069	0.187
WA-254	well	2022-04-27 11:28:44	32525513	5836361	-1.1984	0.0865	0.348575	1.7976	0.2603	0.146876	102.45	8.5147	0.01	0.3212
WA-254	well	2022-04-27 11:39:34	32525513	5836351	-0.0883	0.052	0.209548	1.0256	0.0806	0.045479	102.44	8.9454	0.0179	0.3949
WA-254	well	2022-04-27 11:51:13	32525503	5836351	6.2148	2.0262	8.16513	1.2971	0.0443	0.0249965	102.433	9.4006	0.024	0.519
WA-254	well	2022-04-27 12:02:15	32525493	5836351	0.2461	0.0274	0.110416	0.8372	0.0556	0.0313726	102.41	9.3777	0.022	0.4818
WA-254	well	2022-04-27 12:13:05	32525483	5836351	0.0871	0.0037	0.0149102	0.6638	0.1158	0.0653408	102.413	9.0725	0.0125	0.3056
WA-254	reference	2022-04-27 12:30:25	32525634	5836393	190.426	2.059	0.0188845	1.6607	0.0772	0.0497181	102.393	10.1191	0.0269	0.4463
WA-254	reference	2022-04-27 12:42:09	32525644	5836393	381.748	46.6679	0.428022	2.3132	0.1912	0.123136	102.39	10.4805	0.0267	0.4566
WA-254	reference	2022-04-27 12:53:47	32525644	5836383	-0.3658	0.0165	0.000151332	0.7611	0.078	0.0502333	102.393	9.4395	0.0219	0.4282
WA-254	reference	2022-04-27 13:05:34	32525634	5836383	-0.2821	0.0432	0.000396216	0.8087	0.075	0.0483012	102.373	9.7407	0.018	0.5487
WA-254	reference	2022-04-27 13:17:40	32525624	5836383	0.1341	0.1186	0.00108776	0.5792	0.0233	0.0150056	102.39	9.0522	0.0157	0.5467
WA-254	reference	2022-04-27 13:29:11	32525624	5836393	201.394	9.3953	0.0861706	1.8744	0.0977	0.0629204	102.373	9.5416	0.038	0.6281
WA-254	reference	2022-04-27 13:43:29	32525624	5836403	55.7901	2.3852	0.0218763	2.7476	0.0758	0.0488164	102.36	9.6081	0.0192	0.4115
WA-254	reference	2022-04-27 13:54:24	32525634	5836403	41.0593	4.156	0.0381174	1.8469	0.1028	0.0662049	102.353	9.9435	0.018	0.3455
WA-254	reference	2022-04-27 14:05:30	32525644	5836403	111.379	32.4626	0.297736	1.383	0.1312	0.0844949	102.363	10.308	0.0156	0.3553
WA-264	reference	2022-04-28 08:03:43	32525634	5836393	91.5114	3.3743	0.0668156	1.0049	0.0328	0.0269525	102.87	10.388	0.0251	0.468
WA-264	reference	2022-04-28 08:15:39	32525644	5836393	125.383	5.9064	0.116954	1.7037	0.0734	0.0603144	102.87	10.6665	0.0116	0.2986
WA-264	reference	2022-04-28 08:27:23	32525644	5836383	-0.3116	0.0261	0.000516814	0.6142	0.0404	0.0331976	102.883	10.1905	0.0187	0.4536
WA-264	reference	2022-04-28 08:40:16	32525634	5836383	-0.2597	0.0277	0.000548496	0.5444	0.0302	0.024816	102.89	9.3827	0.0178	0.5166
WA-264	reference	2022-04-28 08:52:05	32525624	5836383	0.0093	0.0154	0.00030494	0.51	0.0182	0.0149554	102.897	9.4183	0.0204	0.6405
WA-264	reference	2022-04-28 09:04:30	32525624	5836393	118.242	5.4817	0.108545	1.356	0.1008	0.0828296	102.897	10.3039	0.0191	0.384
WA-264	reference	2022-04-28 09:15:02	32525624	5836403	20.9147	2.9476	0.0583664	2.5268	0.0688	0.0565345	102.91	10.0596	0.0224	0.5219
WA-264	reference	2022-04-28 09:28:32	32525634	5836403	15.5906	1.2052	0.0238645	1.4337	0.2007	0.16492	102.907	10.1292	0.0075	0.1929
WA-264	reference	2022-04-28 09:39:37	32525644	5836403	83.4357	22.7215	0.449916	1.2589	0.1528	0.125559	102.907	10.3017	0.014	0.3737
WA-264	well	2022-04-28 09:58:43	32525566	5836323	-0.3507	0.0224	0.000596418	0.3983	0.0178	0.00992366	102.887	12.0207	0	0.0459
WA-264	well	2022-04-28 10:09:39	32525561	5836328	-1.2551	0.0452	0.00120349	3.0129	0.154	0.0858564	102.887	10.8491	0.0067	0.2193
WA-264	well	2022-04-28 10:19:44	32525571	5836328	-0.5324	0.0398	0.00105971	3.6834	0.484	0.269834	102.883	10.5189	0.0041	0.1199
WA-264	well	2022-04-28 10:32:04	32525571	5836318	-0.1058	0.1388	0.00369566	1.0417	0.0643	0.0358478	102.88	9.8906	0.0076	0.2452
WA-264	well	2022-04-28 10:43:48	32525561	5836318	0.1407	0.1923	0.00512014	1.0592	0.0959	0.0534651	102.87	9.7469	0.0099	0.2893
WA-264	well	2022-04-28 11:00:29	32525551	5836318	30.0383	3.7726	0.100448	1.9194	0.3042	0.169594	102.863	9.6542	0.016	0.3779
WA-264	well	2022-04-28 11:11:39	32525551	5836328	0.0112	0.8315	0.0221393	2.0392	0.1392	0.0776052	102.863	10.1698	0.0239	0.4284
WA-264	well	2022-04-28 11:31:49	32525561	5836338	-2.3448	0.1557	0.00414564	3.1	0.5226	0.291354	102.86	10.2823	0.0039	0.1207
WA-264	well	2022-04-28 11:43:29	32525571	5836338	-0.6103	0.0518	0.00137922	3.7184	0.5632	0.313989	102.853	10.3515	0.005	0.18
WA-264	well	2022-04-28 11:54:21	32525581	5836338	-0.179	0.019	0.00050589	1.0246	0.0338	0.0188438	102.863	9.7776	0.006	0.18
WA-264	well	2022-04-28 12:06:01	32525581	5836328	-0.6015	0.0519	0.00138188	2.139	0.2617	0.1459	102.857	10.3206	0.0034	0.1442
WA-264	well	2022-04-28 12:17:35	32525581	5836318	0.3782	0.0874	0.00232709	1.1526	0.0168	0.00936615	102.847	9.1867	0.003	0.1283
WA-264	well	2022-04-28 12:29:01	32525581	5836308	3.4382	0.2023	0.0053864	0.9031	0.0989	0.0551376	102.833	9.0587	0.0109	0.3365
WA-264	well	2022-04-28 12:41:32	32525571	5836308	1.1616	0.1615	0.00430006	1.0971	0.1413	0.078776	102.843	9.1472	0.016	0.409
WA-264	well	2022-04-28 12:52:40	32525561	5836308	538.398	132.755	3.5347	1.3822	0.0726	0.0404751	102.823	9.1929	0.0099	0.2782
WA-264	well	2022-04-28 13:04:54	32525551	5836308	33.3351	2.9435	0.078373	1.028	0.0584	0.0325585	102.81	9.8269	0.0149	0.3564

## Sheet: Table S3 Flux coordinates
Distance [m]	Date (UTC)	East	North	Mean CH4 flux [nmol m-2 s-1]	Mean CO2 flux [µmol m-2 s-1]
0	2023-05-04 11:13:00	32525630	5836383	15.27	1.12675
1	2023-05-04 13:40:00	32525630	5836383	122.3	0.91279
2	2023-05-04 13:44:00	32525630	5836384	71.24	0.85498
3	2023-05-04 13:48:00	32525630	5836385	126.18	1.08971
4	2023-05-04 13:51:00	32525630	5836386	182.67	1.26417
5	2023-05-04 13:55:00	32525630	5836387	2.92	1.03171
6	2023-05-04 14:00:00	32525630	5836388	409.01	0.98311
7	2023-05-04 14:07:00	32525630	5836389	66.17	1.91378
8	2023-05-04 14:11:00	32525630	5836390	11.44	1.46409
9	2023-05-04 14:14:00	32525630	5836391	10.85	0.99271
9.8	2023-05-04 14:44:00	32525630	5.83639e+06	2.16	0.99379
10	2023-05-04 14:27:00	32525630	5836395	0.03	0.74481
10.2	2023-05-04 14:35:00	32525630	5.83639e+06	278.76	1.73434
11	2023-05-04 14:18:00	32525630	5836392	1.66	0.98395
12	2023-05-04 14:22:00	32525630	5836394	0.67	0.92777

## Sheet: Table S4 MOx
Probeneingangs#	Sample Site	Position	North	East	Areal	Depth [cm]	dry weight [g]	wet wegiht [g]	MOx [µmol d-1 incubation -1]	MOx dry [µmol d-1 g-1]	MOx wet [µmol d-1 g-1]	mean MOx dry [nmol 0.2 m3 s-1]	mean MOx wet [nmol 0.2 m3 s-1]	Mean [nmol 0.2 m3 s-1]
7425	Rodewald WA-211	P1+5 m east	5836503	32525929	forest, peat	0-5	2.2	8.015	-0.413997	-0.18818	-0.0516528	-67.4733	-72.0944	-54.1196
	Rodewald WA-211	P1+5 m east	5836503	32525929	forest, peat	0-5	2.245	8.071	-0.345694	-0.153984	-0.0428316
	Rodewald WA-211	P1+5 m east	5836503	32525929	forest, peat	0-5	2.264	8.034	-0.323701	-0.142977	-0.0402914
7426	Rodewald WA-211	P1+5 m east	5836503	32525929	forest, peat	5-9	1.828	6.357	-0.376446	-0.205933	-0.0592175	-94.2275	-92.2186
	Rodewald WA-211	P1+5 m east	5836503	32525929	forest, peat	5-9	1.794	6.374	-0.341722	-0.190481	-0.0536119
	Rodewald WA-211	P1+5 m east	5836503	32525929	forest, peat	5-9	1.724	6.107	-0.363776	-0.211007	-0.0595671
7427	Rodewald WA-211	P1-2.5 m east und -2.5 m north	5.8365e+06	3.25259e+07	forest, peat	0-6	2.086	6.295	-0.0404374	-0.0193851	-0.00642373		-6.77766
	Rodewald WA-211	P1-2.5 m east und -2.5 m north	5.8365e+06	3.25259e+07	forest, peat	0-6	1.93	6.761	-0.0136788	-0.00708746	-0.00202319
7428
	Rodewald WA-211	P1-2.5 m east und -2.5 m north	5.8365e+06	3.25259e+07	forest, peat	6-12	1.814	6.608	-0.015774	-0.00869569	-0.0023871		-3.83074
7429	Rodewald WA-211	P1+2.5 m east und + 2.5 m north	5.83651e+06	3.25259e+07	forest, peat	0-6	8.308	10.333	-0.8742	-0.105224	-0.0846027	-128.566	-136.799
	Rodewald WA-211	P1+2.5 m east und + 2.5 m north	5.83651e+06	3.25259e+07	forest, peat	0-6	8.418	10.434	-0.882424	-0.104826	-0.084572
	Rodewald WA-211	P1+2.5 m east und + 2.5 m north	5.83651e+06	3.25259e+07	forest, peat	0-6	8.342	10.234	-0.88587	-0.106194	-0.0865615
7430	Rodewald WA-211	P1+2.5 m east und + 2.5 m north	5.83651e+06	3.25259e+07	forest, peat	6-12	8.474	10.096	-0.712954	-0.0841343	-0.0706175	-111.262	-109.936
	Rodewald WA-211	P1+2.5 m east und + 2.5 m north	5.83651e+06	3.25259e+07	forest, peat	6-12	8.148	10.075	-0.766452	-0.0940663	-0.0760747
	Rodewald WA-211	P1+2.5 m east und + 2.5 m north	5.83651e+06	3.25259e+07	forest, peat	6-12	8.417	10.359	-0.609379	-0.0723986	-0.058826
7431	Rodewald WA-211	P1-2.5 m east und +2.5 m north	5.83651e+06	3.25259e+07	forest, peat	0-6	2.472	8.078	-0.0304336	-0.0123113	-0.00376746	-2.70265	-6.59754
	Rodewald WA-211	P1-2.5 m east und +2.5 m north	5.83651e+06	3.25259e+07	forest, peat	0-6	2.719	8.341	-0.037159	-0.0136664	-0.00445498
7432													-4.70317
	Rodewald WA-211	P1-2.5 m east und +2.5 m north	5.83651e+06	3.25259e+07	forest, peat	6-12	2.547	10.745	-0.031491	-0.0123639	-0.00293075
7433	Rodewald REF	R1-5 m east und +5 m north	5836411	32526044	forest, peat	0-4	1.878	6.288	-0.00543749	-0.00289536	-0.000864741	-5.19817	-5.21814	-7.51163
	Rodewald REF	R1-5 m east und +5 m north	5836411	32526044	forest, peat	0-4	1.967	6.181	-0.0322501	-0.0163956	-0.00521762
	Rodewald REF	R1-5 m east und +5 m north	5836411	32526044	forest, peat	0-4	2.061	6.216	-0.022829	-0.0110767	-0.00367262
7434	Rodewald REF	R1-5 m east und +5 m north	5836411	32526044	forest, peat	4-8	2.492	8.191	-0.00800932	-0.00321401	-0.000977819	-1.55618	-3.53183
	Rodewald REF	R1-5 m east und +5 m north	5836411	32526044	forest, peat	4-8	2.353	7.852	-0.0268842	-0.0114255	-0.00342386
7436	Rodewald REF	R1+5 m east und -5 m north	5836421	32526034	forest, peat	6-12	1.615	7.057	-0.0450194	-0.0278758	-0.00637939	-11.4798	-11.5117
	Rodewald REF	R1+5 m east und -5 m north	5836421	32526034	forest, peat	6-12	1.652	7.088	-0.0507393	-0.0307138	-0.00715847
	Rodewald REF	R1+5 m east und -5 m north	5836421	32526034	forest, peat	6-12	1.618	7.037	-0.0561735	-0.0347178	-0.00798259
7437	Rodewald REF	R1+5 m east und +5 m north	5836421	32526044	forest, peat	0-4	1.269	4.047	-0.0475426	-0.0374646	-0.0117476	-1.1538	-9.7848
	Rodewald REF	R1+5 m east und +5 m north	5836421	32526044	forest, peat	0-4	1.25	4.016
	Rodewald REF	R1+5 m east und +5 m north	5836421	32526044	forest, peat	0-4	1.276	4.058	-0.00181419	-0.00142178	-0.000447064
7439	Rodewald WA-209	P1	5836399	32526148	forest, peat	0-5	1.896	6.033	-0.166289	-0.0877052	-0.0275632	-53.213	-52.8637	-26.2115
	Rodewald WA-209	P1	5836399	32526148	forest, peat	0-5	1.926	6.044	-0.205989	-0.106952	-0.0340816
	Rodewald WA-209	P1	5836399	32526148	forest, peat	0-5	1.926	6.02	-0.223826	-0.116213	-0.0371804
7440	Rodewald WA-209	P2	5836404	32526143	forest, peat	10-15	9.46	10.229	-0.136836	-0.0144647	-0.0133773	-17.0325	-17.2084
	Rodewald WA-209	P2	5836404	32526143	forest, peat	10-15	9.671	10.384	-0.0813115	-0.00840777	-0.00783046
	Rodewald WA-209	P2	5836404	32526143	forest, peat	10-15	9.671	10.355	-0.113513	-0.0117374	-0.0109621
7441	Rodewald WA-209	P3	5836404	32526153	forest, peat	10-15	1.736	5.064	-0.0208719	-0.012023	-0.00412162	-8.59652	-8.56257
	Rodewald WA-209	P3	5836404	32526153	forest, peat	10-15	1.771	5.056	-0.0390177	-0.0220314	-0.0077171
	Rodewald WA-209	P3	5836404	32526153	forest, peat	10-15	1.768	5.031	-0.0209714	-0.0118617	-0.00416844
7444	Rodewald WA-273	P1	5836338	32525761	forest, peat	0-6	4.551	8.021	-0.533131	-0.117146	-0.066467	-70.845	-70.9651	-79.1078
	Rodewald WA-273	P1	5836338	32525761	forest, peat	0-6	4.818	8.012	-0.409296	-0.0849515	-0.0510854
	Rodewald WA-273	P1	5836338	32525761	forest, peat	0-6	4.636	8.052	-0.121683	-0.0262474	-0.0151121
7445	Rodewald WA-273	P1	5836338	32525761	forest, peat	6-12	3.92	8.035	-1.57837	-0.402645	-0.196437	-257.013	-266.107
	Rodewald WA-273	P1	5836338	32525761	forest, peat	6-12	4.545	8.095	-1.21307	-0.266903	-0.149855
	Rodewald WA-273	P1	5836338	32525761	forest, peat	6-12	4.478	8.073	-1.22046	-0.272546	-0.151178
7446	Rodewald WA-273	P2	5836343	32525756	forest, peat	0-6	3.89	7.071	-0.106228	-0.0273078	-0.015023	-39.3283	-39.6027
	Rodewald WA-273	P2	5836343	32525756	forest, peat	0-6	4.025	7.025	-0.236247	-0.0586949	-0.0336295
	Rodewald WA-273	P2	5836343	32525756	forest, peat	0-6	3.929	7.01	-0.177929	-0.045286	-0.0253821
7447	Rodewald WA-273	P2	5836343	32525756	forest, peat	6-12	3.316	7.022	-0.144663	-0.0436258	-0.0206014	-45.564	-41.3759
	Rodewald WA-273	P2	5836343	32525756	forest, peat	6-12	3.416	7.045	-0.153554	-0.0449514	-0.0217962
	Rodewald WA-273	P2	5836343	32525756	forest, peat	6-12	2.436	7.019	-0.245328	-0.100709	-0.034952
7448	Rodewald WA-273	P8	5836353	32525746	forest, peat	0-6	4.767	8.047	-0.112752	-0.0236527	-0.0140117	-23.9943	-23.931
	Rodewald WA-273	P8	5836353	32525746	forest, peat	0-6	4.85	8.05	-0.220973	-0.0455614	-0.02745
	Rodewald WA-273	P8	5836353	32525746	forest, peat	0-6	4.781	8.094	-0.0265138	-0.00554567	-0.00327574
7449	Rodewald WA-273	P8	5836353	32525746	forest, peat	6-12	2.929	8.045	-0.274871	-0.0938447	-0.0341667	-32.4364	-32.6652
	Rodewald WA-273	P8	5836353	32525746	forest, peat	6-12	2.873	8.068	-0.162277	-0.0564833	-0.0201136
	Rodewald WA-273	P8	5836353	32525746	forest, peat	6-12	3.013	8.042	-0.054566	-0.0181102	-0.00678512
7450	Rodewald WA-273-Ref	R1	5836296	32525781	forest, peat	0-6	2.083	7.56	-0.0283284	-0.0135998	-0.00374714	-16.8408	-17.0117	-23.6545
	Rodewald WA-273-Ref	R1	5836296	32525781	forest, peat	0-6	2.173	7.599	-0.147082	-0.067686	-0.0193554
	Rodewald WA-273-Ref	R1	5836296	32525781	forest, peat	0-6	2.04	7.305	-0.063551	-0.0311524	-0.00869965
7451													-2.13798
	Rodewald WA-273-Ref	R1	5836296	32525781	forest, peat	6-12	2.007	7.5	-0.00999203	-0.00497859	-0.00133227
7452	Rodewald WA-273-Ref	R2	5836296	32525791	forest, peat	0-6	3.287	7.062	0.0019152	0.000582658	0.000271198	-3.84829	-3.81304
	Rodewald WA-273-Ref	R2	5836296	32525791	forest, peat	0-6	3.17	7.04	-0.0165543	-0.00522218	-0.00235146
	Rodewald WA-273-Ref	R2	5836296	32525791	forest, peat	0-6	3.239	7.058	-0.0356286	-0.0109999	-0.00504797
7453	Rodewald WA-273-Ref	R2	5836296	32525791	forest, peat	6-12	2.334	5.65	-0.291758	-0.125004	-0.0516386	-59.2861	-63.1722
	Rodewald WA-273-Ref	R2	5836296	32525791	forest, peat	6-12	2.021	5.132	-0.180851	-0.0894858	-0.0352398
	Rodewald WA-273-Ref	R2	5836296	32525791	forest, peat	6-12	2.237	5.53	-0.172635	-0.0771724	-0.0312178
7454	Rodewald WA-273-Ref	R6	5836296	32525771	forest, peat	0-6	1.535	4.617	-0.0229042	-0.0149213	-0.00496083	-29.6818	-29.5428
	Rodewald WA-273-Ref	R6	5836296	32525771	forest, peat	0-6	1.614	4.898	-0.129646	-0.0803259	-0.0264692
	Rodewald WA-273-Ref	R6	5836296	32525771	forest, peat	0-6	1.329	4.071	-0.0968826	-0.0728989	-0.0237982
7455	Rodewald WA-273-Ref	R6	5836296	32525771	forest, peat	6-12	2.206	6.579	-0.180946	-0.0820244	-0.0275035	-25.9891	-26.2493
	Rodewald WA-273-Ref	R6	5836296	32525771	forest, peat	6-12	2.611	7.193	-0.083522	-0.0319885	-0.0116116
	Rodewald WA-273-Ref	R6	5836296	32525771	forest, peat	6-12	2.193	6.362	-0.063342	-0.0288837	-0.0099563
7457	Rodewald WA-272	P1	5.83637e+06	3.25257e+07	peat	0-5	3.3352	8.02	-4.08729	-1.2255	-0.509637	-1538.66	-1103.22	-527.053
	Rodewald WA-272	P1	5.83637e+06	3.25257e+07	peat	0-5	3.34393	8.041	-4.08102	-1.22043	-0.507527
	Rodewald WA-272	P1	5.83637e+06	3.25257e+07	peat	0-5	3.37803	8.123	-4.03183	-1.19354	-0.496347
7460	Rodewald WA-272	P1	5.83637e+06	3.25257e+07	peat	15-20	2.238	8.141	-0.259803	-0.116087	-0.0319129	-355.386	-81.377
	Rodewald WA-272	P1	5.83637e+06	3.25257e+07	peat	15-20	1.678	8.133	-0.267868	-0.159635	-0.0329359
	Rodewald WA-272	P1	5.83637e+06	3.25257e+07	peat	15-20	1.299	8.084	-0.378272	-0.291202	-0.0467926
7461	Rodewald WA-272	P3	5.83638e+06	3.25257e+07	peat	0-5	0.834022	6.136	-0.950884	-1.14012	-0.154968	-2009.67	-317.628
	Rodewald WA-272	P3	5.83638e+06	3.25257e+07	peat	0-5	0.827362	6.087	-0.941157	-1.13754	-0.154618
	Rodewald WA-272	P3	5.83638e+06	3.25257e+07	peat	0-5	0.828042	6.092	-0.768624	-0.928243	-0.126169
7464	Rodewald WA-272	P3	5.83638e+06	3.25257e+07	peat	15-20	0.992	7.071	-1.97863	-1.99458	-0.279823	-4400.45	-605.987
	Rodewald WA-272	P3	5.83638e+06	3.25257e+07	peat	15-20	0.832	7.137	-1.78984	-2.15125	-0.250783
	Rodewald WA-272	P3	5.83638e+06	3.25257e+07	peat	15-20	0.802	7.135	-2.14585	-2.67562	-0.30075
7465	Rodewald WA-272-Ref	R1+5 m east	5836393	32525639	peat	0-5	0.967	7.073	-0.332274	-0.343614	-0.0469779	-647.941	-96.2819	-49943.5
	Rodewald WA-272-Ref	R1+5 m east	5836393	32525639	peat	0-5	0.903	7.045	-0.278929	-0.308891	-0.0395924
	Rodewald WA-272-Ref	R1+5 m east	5836393	32525639	peat	0-5	0.878	7.122	-0.324188	-0.369234	-0.0455192
7467	Rodewald WA-272-Ref	R1+5 m east	5836393	32525639	peat	10-15	1.01283	8.104	-0.570107	-0.562886	-0.0703488	-1298.98	-182.924
	Rodewald WA-272-Ref	R1+5 m east	5836393	32525639	peat	10-15	1.00583	8.048	-0.73513	-0.73087	-0.0913432
	Rodewald WA-272-Ref	R1+5 m east	5836393	32525639	peat	10-15	1.01345	8.109	-0.723822	-0.714214	-0.0892616
7468	Rodewald WA-272-Ref	R1	5836393	32525634	peat	10-15	2.32864	7.067	-507.137	-217.783	-71.7613	-304087	-149551
	Rodewald WA-272-Ref	R1	5836393	32525634	peat	10-15	2.3204	7.042	-510.582	-220.04	-72.5053
	Rodewald WA-272-Ref	R1	5836393	32525634	peat	10-15	2.3204	7.042	-428.882	-184.831	-60.9035
7469	Rodewald WA-275	P1	5836302	32525931	meadow, peat	0-5	4.74232	9.335	-6.37534	-1.34435	-0.68295	-1714.94	-1777.99	-4115.83
	Rodewald WA-275	P1	5836302	32525931	meadow, peat	0-5	4.67933	9.211	-6.18564	-1.32191	-0.671549
	Rodewald WA-275	P1	5836302	32525931	meadow, peat	0-5	4.8866	9.619	-6.00221	-1.2283	-0.623995
7470	Rodewald WA-275	P1	5836302	32525931	meadow, peat	10-15	4.79904	9.608	-21.9226	-4.56812	-2.2817	-6917.12	-6909.97
	Rodewald WA-275	P1	5836302	32525931	meadow, peat	10-15	4.68166	9.373	-27.2354	-5.81747	-2.90573
	Rodewald WA-275	P1	5836302	32525931	meadow, peat	10-15	4.88095	9.772	-24.4473	-5.00872	-2.50177
7471	Rodewald WA-275	P3	5836307	32525936	meadow, peat	0-5	6.97671	10.383	-33.6936	-4.82944	-3.24507	-4116.91	-8382.72
	Rodewald WA-275	P3	5836307	32525936	meadow, peat	0-5	6.91153	10.286	-32.2973	-4.67295	-3.13992
	Rodewald WA-275	P3	5836307	32525936	meadow, peat	0-5	7.36912	10.967	-32.2763	-4.37994	-2.94304
7472	Rodewald WA-275	P3	5836307	32525936	meadow, peat	8-12	6.67764	9.42	-24.8403	-3.71993	-2.63698	-2679.45	-6549.67
	Rodewald WA-275	P3	5836307	32525936	meadow, peat	8-12	7.87564	11.11	-23.6985	-3.00909	-2.13308
	Rodewald WA-275	P3	5836307	32525936	meadow, peat	8-12	7.93873	11.199	-28.2015	-3.5524	-2.51822
7473	Rodewald WA-275	P11	5836317	32525946	meadow, peat	0-5	2.147	6.795	-1.78335	-0.830626	-0.262451	-1468.79	-719.391
	Rodewald WA-275	P11	5836317	32525946	meadow, peat	0-5	1.988	6.291	-1.59745	-0.803544	-0.253926
	Rodewald WA-275	P11	5836317	32525946	meadow, peat	0-5	2.121	6.287	-1.78638	-0.842237	-0.284139
7474	Rodewald WA-275	P11	5836317	32525946	meadow, peat	10-15	1.37848	6.632	-0.876635	-0.635942	-0.132183	-1350.25	-355.258
	Rodewald WA-275	P11	5836317	32525946	meadow, peat	10-15	1.44499	6.952	-0.857285	-0.593279	-0.123315
	Rodewald WA-275	P11	5836317	32525946	meadow, peat	10-15	1.24816	6.005	-0.839637	-0.672701	-0.139823
7475	Rodewald WA-275-Ref	R1	5836359	32525916	meadow, peat	0-5	2.37	6.662	-0.0277573	-0.0117119	-0.00416651	-19.0718	-10.7305	-77.7163
	Rodewald WA-275-Ref	R1	5836359	32525916	meadow, peat	0-5	2.354	6.595	-0.0309921	-0.0131657	-0.00469933
	Rodewald WA-275-Ref	R1	5836359	32525916	meadow, peat	0-5	2.814	8.062	-0.0247884	-0.00880895	-0.00307472
7476	Rodewald WA-275-Ref	R1	5836359	32525916	meadow, peat	9-13	1.095	5.897	-0.193373	-0.176596	-0.0327917	-593.068	-144.702
	Rodewald WA-275-Ref	R1	5836359	32525916	meadow, peat	9-13	1.16	5.656	-0.110741	-0.0954665	-0.0195794
	Rodewald WA-275-Ref	R1	5836359	32525916	meadow, peat	9-13	1.099	5.698	-0.619082	-0.563314	-0.108649
7481	Rodewald WA-254-Ref	R1-1 m east	5836393	32525633	peat	40-60	0.666	6.216	-0.268945	-0.403821	-0.0432665	-92.2034	-90.1731	-545.745
	Rodewald WA-254-Ref	R1-1 m east	5836393	32525633	peat	40-60	0.558	5.226	-0.229589	-0.41145	-0.0439321
	Rodewald WA-254-Ref	R1-1 m east	5836393	32525633	peat	40-60	0.558	5.115	-0.186749	-0.334676	-0.0365101
7482	Rodewald WA-254-Ref	R1-1 m east	5836393	32525633	peat	80-100	0.66	6.006	-1.58203	-2.39702	-0.263409	-599.556	-588.814
	Rodewald WA-254-Ref	R1-1 m east	5836393	32525633	peat	80-100	0.661	6.083	-1.63359	-2.47139	-0.26855
	Rodewald WA-254-Ref	R1-1 m east	5836393	32525633	peat	80-100	0.623	5.893	-1.62551	-2.60917	-0.275838
7483	Rodewald WA-254-Ref	R1+1 m east	5836393	32525635	peat	60-80	1.16297	4.744	-2.1951	-1.8875	-0.462711	-2931.68	-958.248
	Rodewald WA-254-Ref	R1+1 m east	5836393	32525635	peat	60-80	1.18699	4.842	-2.14008	-1.80294	-0.441982
	Rodewald WA-254-Ref	R1+1 m east	5836393	32525635	peat	60-80	1.29485	5.282	-2.16526	-1.6722	-0.409931
7484	Rodewald WA-254	P1+5 east und +5 m north	5.83637e+06	3.25255e+07	peat	80-100	3.299	5.12	-3.56254	-1.07988	-0.695808	-1712.81	-1673.65	-1673.65
	Rodewald WA-254	P1+5 east und +5 m north	5.83637e+06	3.25255e+07	peat	80-100	3.707	5.4	-4.32685	-1.16721	-0.801269
	Rodewald WA-254	P1+5 east und +5 m north	5.83637e+06	3.25255e+07	peat	80-100	3.557	5.38	-4.29865	-1.2085	-0.799006

## Sheet: Table S5 qPCR 16S, MOB
ID	Name	Weight [g]	16-S		pmoA		pmoA Abundance	Site	16S RNA gene	pmoA	pmoA Abundance
			[copies µL-1]	[copies g-1]	corr_copies µL-1	copies g-1	[%]		[copies g-1]	copies g-1	[%]
2022/18	Probe 7444 Steimbke 9-1 Center, über Bohrung, Rodewald WA-273 0-6cm	0.509	1.8569e+07	1.81175e+10				WA-273 well	1.29367e+10
2022/19	Probe 7445 Steimbke 9-2, Rodewald WA-273 6-12 cm	0.503	1.57808e+07	1.55807e+10
2022/20	Probe 7446 B-1 bei Betonrest Nähe Ring 8, Rodewald WA-273 0-6 cm	0.506	1.29491e+07	1.27091e+10
2022/21	Probe 7447 B-2, Rodewald WA-273 6-12cm	0.526	1.31876e+07	1.24511e+10
2022/22	Probe 7448 S-1 Nähe Ring 1, Rodewald WA-273 0-6cm	0.511	9.46733e+06	9.20094e+09
2022/23	Probe 7449 S-2, Rodewald WA-273 6-12cm	0.502	9.66425e+06	9.56071e+09
2022/24	Probe 7450 R-2-1 Center der Referenzstelle Ring 2, WA-273-REF 0-6cm	0.507	8.44103e+06	8.26824e+09				WA-273 reference	1.21544e+10
2022/25	Probe 7451 R-2-2, WA-273-REF 6-12cm	0.509	2.95718e+06	2.88526e+09
2022/26	Probe 7452 R-27-1 Nähe Ring 27, WA-273-REF 0-6cm	0.513	2.09765e+07	2.03067e+10
2022/27	Probe 7453 R-27-2, WA-273-REF 6-12cm	0.502	1.6309e+07	1.61342e+10
2022/28	Probe 7454 R-3-1 Nähe Ring 3, WA-273-REF 0-6cm	0.504	8.70283e+06	8.57542e+09
2022/29	Probe 7455 R-3-2, WA-273-REF 6-12cm	0.523	1.76464e+07	1.67564e+10
2022/30	Probe 7457 272-20-1 Rodewald WA-272 0-5 cm	0.52	7.85456e+06	1.46081e+10	8.83343e+06	4.47036e+07	0.30602	WA-272 well	4.09585e+09	1.57457e+07	0.286081
2022/31	Probe 7458 272-20-2 Rodewald WA-272 5-10 cm	0.515	3.14363e+06	5.90334e+09	8.23072e+06	4.20579e+07	0.712441
2022/32	Probe 7459 272-20-3 Rodewald WA-272 10-15 cm	0.539	2.18312e+06	3.91709e+09	7.14911e+06	3.49044e+07	0.891079
2022/33	Probe 7460 272-20-4 Rodewald WA-272 15-20 cm	0.515	1.72426e+06	3.23795e+09	163843	837215	0.0258563
2022/34	Probe 7461 272-37-1 Rodewald WA-272 0-5 cm	0.517	502270	9.3955e+08	138803	706521	0.0751977
2022/35	Probe 7462 272-37-2 Rodewald WA-272 5-10 cm	0.505	702264	1.34488e+09	43762.8	228050	0.0169569
2022/36	Probe 7463 272-37-3 Rodewald WA-272 10-15 cm	0.506	988081	1.8885e+09	40313.3	209659	0.0111019
2022/37	Probe 7464 272-37-4 Rodewald WA-272 15-20 cm	0.512	491019	9.27475e+08	451112	2.31863e+06	0.249994
2022/38	Probe 7465 272-Ref-1 WA-272-Ref 0-5 cm	0.505	637227	1.22033e+09	74241.4	386875	0.0317026	WA-272 reference	5.55835e+09	4.67558e+06	0.0544905
2022/39	Probe 7466 272-Ref-2 WA-272-Ref 5-10 cm	0.504	876459	1.6818e+09	156180	815477	0.0484883
2022/40	Probe 7467 272-Ref-3 WA-272-Ref 10-15 cm	0.524	2.01964e+06	3.72749e+09	249827	1.25466e+06	0.0336595
2022/41	Probe 7468 R30-1 + R30-2 WA-272-Ref 15 cm	0.507	8.1802e+06	1.56038e+10	3.12983e+06	1.62453e+07	0.104111
2022/42	Probe 7469 B_275 P_1 0-5cm	0.502	1.33785e+07	1.57968e+10				WA-275 well	1.69557e+10	2.96511e+07	0.166218
2022/43	Probe 7470 B_275 P_1 10-15cm	0.503	1.94066e+07	2.2869e+10	1.30245e+07	4.1764e+07	0.182623
2022/44	Probe 7471 B_275 P_3 0-5cm	0.519	1.6694e+07	1.9066e+10	3.73194e+06	1.15978e+07	0.0608298
2022/45	Probe 7472 B_275 P_3 8-12cm	0.5	1.17644e+07	1.39465e+10	1.10334e+07	3.55916e+07	0.255201
2022/46	Probe 7473 B_275 P_11 0-5cm	0.535	1.66464e+07	1.8443e+10
2022/47	Probe 7474 B_275 P_11 10-15cm	0.505	9.89372e+06	1.16127e+10
2022/48	Probe 7475 Ref #5 0-5cm	0.527	1.69776e+07	1.90956e+10				WA-275 reference	1.13556e+10
2022/49	Probe 7476 Ref #5 9-13cm	0.505	3.08045e+06	3.61567e+09
2022/50	Probe 7481 254-Ref-1 40 cm	0.505	344842	6.60393e+08				WA-254 well	2.45699e+09
2022/51	Probe 7482 254-Ref-2 80 cm	0.524	357262	6.59371e+08
2022/52	Probe 7483 254-Ref-3 60 cm	0.515	3.22237e+06	6.05121e+09
2022/53	Probe 7484 254-1 80 cm	0.517	6.24757e+06	1.16868e+10	6.4529e+06	3.28459e+07	0.281052	WA-254 reference	1.16868e+10	3.28459e+07	0.281052

## Sheet: Table S6 MOB-like sequences
							Forest																													Peat												Meadow
						Area	Forest	Forest	Forest	Forest	Forest	Forest	Forest	Forest	Forest	Forest	Forest	Forest	Forest	Forest	Forest	Forest	Forest	Forest	Forest	Forest	Forest	Forest	Forest	Forest	Forest	Forest	Forest	Forest	Forest	Peat	Peat	Peat	Peat	Peat	Peat	Peat	Peat	Peat	Peat	Peat	Peat	Meadow	Meadow
						Site	WA-211	WA-211	WA-211	WA-211	WA-211	WA-211	WA-211	WA-211	WA-211	WA-211	WA-211	WA-211	WA-211	WA-211	WA-209	WA-209	WA-209	WA-273	WA-273	WA-273	WA-273	WA-273	WA-273	WA-273	WA-273	WA-273	WA-273	WA-273	WA-273	WA-272	WA-272	WA-272	WA-272	WA-272	WA-272	WA-272	WA-272	WA-272	WA-272	WA-272	WA-272	WA-275	WA-275
						Category	Well	Well	Well	Well	Well	Well	Well	Well	Reference	Reference	Reference	Reference	Reference	Reference	Well	Well	Well	Well	Well	Well	Well	Well	Well	Reference	Reference	Reference	Reference	Reference	Reference	Well	Well	Well	Well	Well	Well	Well	Well	Reference	Reference	Reference	Reference	Well	Well
						Sample depth	5	9	6	12	6	12	6	12	4	8	6	12	4	8	5	15	15	6	12	6	12	6	12	6	12	6	12	6	12	5	10	15	20	5	10	15	20	5	10	15	15	5	15
						Sample ID	7425	7426	7427	7428	7429	7430	7431	7432	7433	7434	7435	7436	7437	7438	7439	7440	7441	7444	7445	7446	7447	7448	7449	7450	7451	7452	7453	7454	7455	7457	7458	7459	7460	7461	7462	7463	7464	7465	7466	7467	7468	7469	7470
ZOTU.ID	domain	phyla	class	order	family	genus	SJ.2022.1	SJ.2022.2	SJ.2022.3	SJ.2022.4	SJ.2022.5	SJ.2022.6	SJ.2022.7	SJ.2022.8	SJ.2022.9	SJ.2022.10	SJ.2022.11	SJ.2022.12	SJ.2022.13	SJ.2022.14	SJ.2022.15	SJ.2022.16	SJ.2022.17	SJ.2022.18	SJ.2022.19	SJ.2022.20	SJ.2022.21	SJ.2022.22	SJ.2022.23	SJ.2022.24	SJ.2022.25	SJ.2022.26	SJ.2022.27	SJ.2022.28	SJ.2022.29	SJ.2022.30	SJ.2022.31	SJ.2022.32	SJ.2022.33	SJ.2022.34	SJ.2022.35	SJ.2022.36	SJ.2022.37	SJ.2022.38	SJ.2022.39	SJ.2022.40	SJ.2022.41	SJ.2022.42	SJ.2022.43
Zotu1	Bacteria	Proteobacteria	Alphaproteobacteria	Rhizobiales	Beijerinckiaceae	Methylocystis	11	75	1	2	15	7	2	4	0	1	2	15	3	2	3	19	2	2	7	1	36	4	4	0	0	1	0	0	3	13	50	47	1	1052	913	377	276	84	61	4	5997	110	185
Zotu10154	Bacteria	Proteobacteria	Gammaproteobacteria	Methylococcales	Methylomonaceae	Methylomonaceae_unclassified	0	0	0	0	1	0	0	0	0	0	0	0	0	0	0	0	0	0	0	0	0	0	0	0	0	0	0	0	0	5	0	0	0	1	0	0	0	0	0	0	0	0	0
Zotu1064	Bacteria	Proteobacteria	Gammaproteobacteria	Methylococcales	Methylomonaceae	Methylomonaceae_unclassified	0	0	0	0	0	0	0	0	0	0	0	0	0	0	0	0	0	0	0	0	0	0	0	0	0	0	0	0	0	0	29	3	1	0	0	0	0	0	0	0	0	0	0
Zotu10719	Bacteria	Proteobacteria	Gammaproteobacteria	Methylococcales	Methylomonaceae	Methylomonaceae_unclassified	0	0	0	0	0	0	0	0	0	0	0	0	0	0	0	0	0	0	0	0	0	0	0	0	0	0	0	0	0	2	0	0	0	0	0	0	0	0	0	0	0	0	0
Zotu10918	Bacteria	Verrucomicrobia	Verrucomicrobiae	Methylacidiphilales	Methylacidiphilaceae	uncultured	0	0	0	0	2	0	0	0	0	0	0	0	0	0	2	0	0	1	6	0	0	9	0	0	0	13	0	0	0	0	0	0	0	0	0	0	0	0	0	0	0	1	0
Zotu11101	Bacteria	Verrucomicrobia	Verrucomicrobiae	Methylacidiphilales	Methylacidiphilaceae	uncultured	1	0	0	2	0	0	0	0	0	0	1	0	12	0	9	0	2	3	0	6	0	2	1	0	2	2	0	0	0	0	0	0	0	4	0	0	0	0	0	0	0	0	0
Zotu1118	Bacteria	Verrucomicrobia	Verrucomicrobiae	Methylacidiphilales	Methylacidiphilaceae	uncultured	66	19	34	87	0	2	17	27	261	78	185	78	38	8	16	6	0	0	0	0	3	8	6	26	8	0	2	3	1	0	0	0	0	1	6	7	0	1	0	0	0	0	0
Zotu11190	Bacteria	Verrucomicrobia	Verrucomicrobiae	Methylacidiphilales	Methylacidiphilaceae	uncultured	3	3	0	0	0	0	1	9	0	0	0	0	0	0	0	1	0	0	0	0	0	0	0	0	0	0	0	0	0	0	0	0	0	3	0	0	0	0	0	0	0	1	0
Zotu11436	Bacteria	Verrucomicrobia	Verrucomicrobiae	Methylacidiphilales	Methylacidiphilaceae	uncultured	4	0	0	0	0	0	0	0	2	0	2	0	7	0	1	0	1	0	0	2	0	0	0	0	0	14	0	2	0	0	0	0	0	0	0	0	0	0	0	0	0	0	0
Zotu11486	Bacteria	Rokubacteria	NC10	Methylomirabilales	Methylomirabilaceae	Sh765B-TzT-35	0	0	0	0	0	0	0	0	0	0	0	0	0	0	0	0	0	0	0	0	0	0	0	0	0	0	0	0	0	0	0	0	0	0	0	0	3	9	9	7	0	0	0
Zotu11590	Bacteria	Verrucomicrobia	Verrucomicrobiae	Methylacidiphilales	Methylacidiphilaceae	uncultured	7	0	0	3	0	0	0	0	4	0	6	0	5	0	11	3	0	0	0	2	4	2	1	1	0	3	0	0	0	0	0	0	0	0	0	0	0	1	0	0	0	0	0
Zotu11637	Bacteria	Proteobacteria	Alphaproteobacteria	Rhizobiales	Beijerinckiaceae	Methylocystis	0	0	0	0	0	0	0	0	0	0	0	0	0	0	0	0	0	0	0	0	0	0	0	0	0	0	0	0	0	0	0	0	0	0	0	0	0	0	0	0	0	0	0
Zotu11666	Bacteria	Proteobacteria	Alphaproteobacteria	Rhizobiales	Beijerinckiaceae	Methylobacterium	0	0	0	2	0	0	0	0	0	0	5	0	2	0	0	0	0	1	0	2	0	1	0	0	0	1	0	0	0	17	0	0	0	1	0	0	0	0	0	0	0	0	0
Zotu11722	Bacteria	Verrucomicrobia	Verrucomicrobiae	Methylacidiphilales	Methylacidiphilaceae	uncultured	0	0	0	0	0	0	0	0	0	0	0	0	0	0	0	0	0	0	0	0	0	0	0	0	0	0	0	0	0	16	0	0	0	1	0	0	0	0	0	0	0	0	0
Zotu1179	Bacteria	Verrucomicrobia	Verrucomicrobiae	Methylacidiphilales	Methylacidiphilaceae	uncultured	67	48	10	18	7	0	33	25	34	9	3	10	5	1	30	1	10	7	4	1	17	17	28	7	1	11	4	4	0	0	0	0	0	19	0	12	0	0	0	0	16	16	8
Zotu11987	Bacteria	Verrucomicrobia	Verrucomicrobiae	Methylacidiphilales	Methylacidiphilaceae	uncultured	3	0	0	0	0	0	0	0	0	0	1	0	6	0	1	0	0	0	0	1	1	3	0	0	0	16	0	0	0	0	0	0	0	1	0	0	0	0	0	0	0	0	0
Zotu12054	Bacteria	Verrucomicrobia	Verrucomicrobiae	Methylacidiphilales	Methylacidiphilaceae	uncultured	0	0	0	0	0	0	0	0	0	0	0	0	0	0	0	0	31	0	0	0	0	0	0	0	0	0	0	0	0	0	0	0	0	0	0	0	0	0	0	0	0	3	0
Zotu1206	Bacteria	Proteobacteria	Gammaproteobacteria	Methylococcales	Methylomonaceae	Crenothrix	0	0	0	0	1	1	0	0	0	0	0	0	0	0	0	0	0	0	5	0	0	0	0	0	0	0	0	0	0	5	17	9	0	0	0	0	0	0	0	0	1	0	0
Zotu12125	Bacteria	Verrucomicrobia	Verrucomicrobiae	Methylacidiphilales	Methylacidiphilaceae	uncultured	31	5	0	0	0	0	0	0	0	0	0	0	0	0	1	0	0	0	0	0	0	0	0	0	0	2	0	0	0	0	0	0	0	0	0	0	0	0	0	0	0	0	0
Zotu1217	Bacteria	Verrucomicrobia	Verrucomicrobiae	Methylacidiphilales	Methylacidiphilaceae	uncultured	29	1	8	35	5	1	0	0	221	4	46	0	128	1	14	2	49	31	7	21	10	19	11	8	3	33	13	45	0	0	0	0	0	39	0	0	0	1	0	0	1	5	0
Zotu12372	Bacteria	Verrucomicrobia	Verrucomicrobiae	Methylacidiphilales	Methylacidiphilaceae	uncultured	8	1	0	0	0	0	0	0	0	0	0	0	0	0	4	0	0	2	3	0	0	0	0	0	0	0	0	0	0	0	0	0	0	0	0	0	0	0	0	0	0	3	1
Zotu12663	Bacteria	Verrucomicrobia	Verrucomicrobiae	Methylacidiphilales	Methylacidiphilaceae	uncultured	0	0	0	0	0	0	0	0	0	0	0	0	0	0	0	0	0	0	0	0	0	0	0	0	0	0	0	0	0	1	4	0	0	0	0	0	0	0	0	0	0	0	2
Zotu12672	Bacteria	Verrucomicrobia	Verrucomicrobiae	Methylacidiphilales	Methylacidiphilaceae	uncultured	0	0	0	0	0	0	0	0	0	0	0	0	0	0	0	0	0	0	0	0	0	0	0	0	0	0	0	0	0	0	0	0	0	0	0	0	0	0	0	0	0	0	0
Zotu12864	Bacteria	Proteobacteria	Alphaproteobacteria	Rhizobiales	Methyloligellaceae	Methyloligellaceae_unclassified	0	0	0	0	3	3	0	0	0	0	0	0	0	0	0	0	0	0	0	0	0	0	0	0	0	0	0	0	0	4	1	1	0	0	0	0	0	0	0	0	0	2	0
Zotu12907	Bacteria	Verrucomicrobia	Verrucomicrobiae	Methylacidiphilales	Methylacidiphilaceae	uncultured	0	0	0	1	0	0	0	0	3	0	11	0	11	0	0	0	0	0	0	0	0	0	0	0	0	2	0	1	0	0	0	0	0	3	0	0	0	0	0	0	0	0	0
Zotu12915	Bacteria	Proteobacteria	Gammaproteobacteria	Methylococcales	Methylomonaceae	Methylomonaceae_unclassified	0	0	0	0	0	0	0	0	0	0	0	0	0	0	0	0	0	0	0	0	0	0	0	0	0	0	0	0	0	0	29	2	0	0	0	0	0	0	0	0	0	0	0
Zotu13122	Bacteria	Proteobacteria	Gammaproteobacteria	Methylococcales	Methylomonaceae	Methylomonaceae_unclassified	0	0	0	0	0	0	0	0	0	0	0	0	0	0	0	0	0	0	0	0	0	0	0	0	0	0	0	0	0	0	0	0	0	0	0	0	0	0	0	0	0	0	0
Zotu1341	Bacteria	Verrucomicrobia	Verrucomicrobiae	Methylacidiphilales	Methylacidiphilaceae	uncultured	61	76	29	20	4	4	128	46	41	12	39	7	28	0	27	3	6	7	2	19	69	2	30	7	2	32	47	14	1	0	0	0	0	7	0	0	0	9	0	0	1	7	0
Zotu13416	Bacteria	Proteobacteria	Gammaproteobacteria	Methylococcales	Methylomonaceae	Methylomonaceae_unclassified	0	0	0	0	0	0	0	0	0	0	0	0	0	0	0	0	0	0	0	0	0	0	0	0	0	0	0	0	0	0	0	0	4	1	0	0	0	0	0	0	0	0	0
Zotu1344	Bacteria	Rokubacteria	NC10	Methylomirabilales	Methylomirabilaceae	Sh765B-TzT-35	0	0	0	0	0	0	0	0	0	0	0	0	0	0	0	0	0	3	15	0	0	0	0	0	0	0	0	0	0	2	0	0	0	0	0	0	0	0	0	0	0	0	2
Zotu13475	Bacteria	Proteobacteria	Alphaproteobacteria	Rhizobiales	Beijerinckiaceae	Methylobacterium	1	0	0	0	0	0	0	0	0	0	7	0	0	0	0	0	0	0	0	0	0	0	0	0	0	0	0	4	0	21	0	0	0	0	0	0	0	0	0	0	0	0	0
Zotu13589	Bacteria	Verrucomicrobia	Verrucomicrobiae	Methylacidiphilales	Methylacidiphilaceae	uncultured	0	0	0	0	0	0	0	0	0	0	0	0	0	0	0	0	0	0	1	0	0	0	0	0	0	0	0	0	0	8	2	1	1	1	0	0	0	0	0	0	0	0	0
Zotu13947	Bacteria	Verrucomicrobia	Verrucomicrobiae	Methylacidiphilales	Methylacidiphilaceae	uncultured	0	0	0	0	0	0	0	0	0	0	0	0	0	0	0	0	0	0	0	0	1	0	0	0	0	0	0	0	0	0	0	0	0	0	0	0	0	0	0	0	0	0	0
Zotu14440	Bacteria	Verrucomicrobia	Verrucomicrobiae	Methylacidiphilales	Methylacidiphilaceae	uncultured	0	0	0	0	0	0	0	0	1	0	9	0	15	0	0	0	0	0	0	0	0	0	0	0	0	0	0	0	0	0	0	0	0	0	0	0	0	0	0	0	0	0	0
Zotu14521	Bacteria	Proteobacteria	Alphaproteobacteria	Rhizobiales	Beijerinckiaceae	Methylocella	3	5	0	0	0	0	0	0	0	1	0	0	0	0	1	2	0	0	0	0	0	0	0	0	0	0	0	0	0	0	0	0	0	0	0	0	0	0	0	0	1	0	0
Zotu14646	Bacteria	Verrucomicrobia	Verrucomicrobiae	Methylacidiphilales	Methylacidiphilaceae	uncultured	0	0	0	0	0	0	0	0	0	0	0	0	0	0	31	1	0	0	0	2	4	0	0	0	0	1	0	0	0	0	0	0	0	0	0	0	0	0	0	0	0	0	0
Zotu14667	Bacteria	Verrucomicrobia	Verrucomicrobiae	Methylacidiphilales	Methylacidiphilaceae	uncultured	0	0	0	0	0	0	0	0	0	0	0	0	0	0	0	0	0	0	0	0	0	0	0	0	0	0	0	0	0	0	0	0	0	0	0	0	0	0	0	0	0	1	1
Zotu14778	Bacteria	Proteobacteria	Gammaproteobacteria	Methylococcales	Methylomonaceae	Methylomonaceae_unclassified	0	0	0	0	0	0	0	0	0	0	0	0	0	0	0	0	0	0	0	0	0	0	0	0	0	0	0	0	0	0	5	2	0	0	0	0	0	0	0	0	0	0	0
Zotu14997	Bacteria	Proteobacteria	Gammaproteobacteria	Methylococcales	Methylomonaceae	Methylomonas	0	0	0	0	0	0	0	0	0	0	0	0	0	0	0	0	0	0	0	0	0	0	0	0	0	0	0	0	0	1	5	0	0	0	0	0	0	0	0	0	0	0	0
Zotu15040	Bacteria	Proteobacteria	Gammaproteobacteria	Methylococcales	Methylomonaceae	Methylomonaceae_unclassified	0	0	0	0	0	0	0	0	0	0	0	0	0	0	0	0	0	0	0	0	0	0	0	0	0	0	0	0	0	0	16	6	0	0	0	0	0	0	0	0	0	0	0
Zotu15058	Bacteria	Verrucomicrobia	Verrucomicrobiae	Methylacidiphilales	Methylacidiphilaceae	uncultured	0	0	0	0	0	0	0	0	0	0	0	0	0	0	0	0	0	0	0	0	0	0	0	0	0	0	0	0	0	0	1	2	0	0	0	0	0	0	0	0	0	0	6
Zotu1514	Bacteria	Rokubacteria	NC10	Methylomirabilales	Methylomirabilaceae	Sh765B-TzT-35	0	0	0	0	0	0	0	0	0	0	0	0	0	0	0	0	0	0	7	0	0	0	0	0	0	0	0	0	0	20	163	219	175	7	0	0	1	0	1	0	0	0	17
Zotu1587	Bacteria	Verrucomicrobia	Verrucomicrobiae	Methylacidiphilales	Methylacidiphilaceae	uncultured	14	0	7	9	1	0	0	0	31	0	36	4	93	0	3	3	49	21	3	19	29	29	17	10	4	46	13	57	0	0	0	0	0	2	0	0	0	0	0	0	0	9	0
Zotu16551	Bacteria	Proteobacteria	Gammaproteobacteria	Methylococcales	Methylomonaceae	Methylomonaceae_unclassified	0	0	0	0	0	0	0	0	0	0	0	0	0	0	0	0	0	0	0	0	0	0	0	0	0	0	0	0	0	0	0	0	0	0	0	0	0	0	0	0	0	0	0
Zotu16863	Bacteria	Verrucomicrobia	Verrucomicrobiae	Methylacidiphilales	Methylacidiphilaceae	uncultured	0	0	0	0	0	0	0	0	2	0	2	0	1	0	0	0	0	0	0	0	0	0	0	3	0	0	0	0	0	0	0	0	0	0	0	0	0	0	0	0	0	0	0
Zotu17283	Bacteria	Rokubacteria	NC10	Methylomirabilales	Methylomirabilaceae	Sh765B-TzT-35	0	0	0	0	0	0	0	0	0	0	0	0	0	0	0	0	0	0	0	0	0	0	0	0	0	0	0	0	0	0	0	0	0	0	0	0	0	0	0	2	0	7	2
Zotu17387	Bacteria	Verrucomicrobia	Verrucomicrobiae	Methylacidiphilales	Methylacidiphilaceae	uncultured	1	0	0	0	0	0	0	0	0	0	0	0	0	0	12	0	0	0	0	3	0	1	0	0	0	0	0	0	0	0	0	0	0	0	0	0	0	0	0	0	0	0	0
Zotu174	Bacteria	Proteobacteria	Gammaproteobacteria	Methylococcales	Methylomonaceae	Methylomonaceae_unclassified	0	0	0	0	0	0	0	0	0	0	0	0	0	0	0	0	0	0	0	0	0	0	0	0	0	0	0	0	0	0	1	0	0	0	1	0	0	0	0	0	5	0	0
Zotu17586	Bacteria	Verrucomicrobia	Verrucomicrobiae	Methylacidiphilales	Methylacidiphilaceae	uncultured	0	0	0	0	0	0	0	0	0	0	0	0	0	0	0	0	0	0	0	0	0	0	0	0	0	0	0	0	0	0	0	0	0	0	0	0	0	1	0	0	1	2	0
Zotu17825	Bacteria	Proteobacteria	Alphaproteobacteria	Rhizobiales	Beijerinckiaceae	Methylocella	1	0	1	0	0	0	3	0	0	0	0	7	5	1	0	0	0	0	0	0	0	0	0	0	0	0	0	1	0	0	0	0	0	0	0	0	0	0	0	0	0	0	0
Zotu17826	Bacteria	Proteobacteria	Alphaproteobacteria	Rhizobiales	Beijerinckiaceae	Methylobacterium	0	1	0	0	0	0	0	0	0	0	1	0	0	0	0	0	0	0	0	0	0	0	0	0	0	0	0	0	0	0	0	0	0	0	0	0	0	1	0	0	0	0	0
Zotu18238	Bacteria	Verrucomicrobia	Verrucomicrobiae	Methylacidiphilales	Methylacidiphilaceae	uncultured	1	0	0	0	0	0	0	0	8	0	1	0	4	0	0	0	0	0	0	0	0	0	0	0	0	0	0	0	0	0	0	0	0	0	0	0	0	0	0	0	0	0	0
Zotu1827	Bacteria	Verrucomicrobia	Verrucomicrobiae	Methylacidiphilales	Methylacidiphilaceae	uncultured	20	0	10	8	0	0	0	0	63	0	184	2	196	2	3	0	0	0	0	9	6	5	1	10	0	5	0	47	0	0	0	0	0	0	0	0	0	0	0	0	0	1	0
Zotu18395	Bacteria	Rokubacteria	NC10	Methylomirabilales	Methylomirabilaceae	Sh765B-TzT-35	0	0	0	0	0	0	0	0	0	0	0	0	0	0	0	0	0	0	0	0	0	0	0	0	0	0	0	0	0	0	0	0	0	0	0	0	0	0	0	0	0	4	0
Zotu18784	Bacteria	Proteobacteria	Alphaproteobacteria	Rhizobiales	Beijerinckiaceae	Methylocella	2	0	0	0	0	0	0	0	1	0	3	0	2	0	10	0	0	0	30	1	0	0	0	0	0	1	0	0	0	0	0	0	0	0	0	0	0	0	0	0	0	0	0
Zotu1888	Bacteria	Verrucomicrobia	Verrucomicrobiae	Methylacidiphilales	Methylacidiphilaceae	uncultured	5	0	6	6	0	1	0	0	51	2	178	3	133	8	2	0	10	0	0	0	0	3	2	41	5	3	9	84	1	0	0	0	0	2	0	0	3	0	0	0	1	0	0
Zotu19641	Bacteria	Verrucomicrobia	Verrucomicrobiae	Methylacidiphilales	Methylacidiphilaceae	uncultured	0	0	0	0	2	0	0	0	0	0	0	0	2	0	0	0	0	8	1	3	0	2	0	1	0	1	0	1	0	0	0	0	0	0	0	0	0	0	0	0	0	0	0
Zotu19731	Bacteria	Proteobacteria	Alphaproteobacteria	Rhizobiales	Beijerinckiaceae	Methylobacterium	0	0	0	0	0	0	0	0	0	0	0	0	0	0	0	0	0	0	0	0	0	0	0	0	0	0	0	0	0	7	0	0	0	0	0	0	0	0	0	0	0	0	0
Zotu1990	Bacteria	Verrucomicrobia	Verrucomicrobiae	Methylacidiphilales	Methylacidiphilaceae	uncultured	22	6	1	2	3	1	0	0	147	0	235	0	25	2	6	6	8	0	1	7	7	37	4	1	2	6	0	8	0	0	0	0	0	0	0	0	0	0	0	0	0	2	0
Zotu19962	Bacteria	Proteobacteria	Alphaproteobacteria	Rhizobiales	Beijerinckiaceae	Methylobacterium	0	0	0	0	0	0	1	0	0	0	0	0	0	0	0	0	0	0	0	0	0	0	0	0	0	0	1	0	0	9	0	0	0	0	0	0	0	0	0	0	0	0	0
Zotu20193	Bacteria	Verrucomicrobia	Verrucomicrobiae	Methylacidiphilales	Methylacidiphilaceae	uncultured	0	0	0	0	0	0	0	0	0	0	0	0	0	0	0	0	0	0	0	0	0	0	0	0	0	11	0	0	0	0	0	0	0	0	0	0	0	0	0	0	0	0	0
Zotu2035	Bacteria	Verrucomicrobia	Verrucomicrobiae	Methylacidiphilales	Methylacidiphilaceae	uncultured	66	6	6	76	0	0	34	127	17	5	46	17	18	0	17	2	20	4	3	2	2	14	3	3	1	17	3	8	1	0	0	0	0	5	0	0	0	0	0	0	0	1	0
Zotu20558	Bacteria	Verrucomicrobia	Verrucomicrobiae	Methylacidiphilales	Methylacidiphilaceae	uncultured	0	0	0	0	0	0	0	0	1	0	1	0	13	0	0	0	1	0	0	0	0	0	0	0	0	1	0	0	0	0	0	0	0	0	0	0	0	0	0	0	0	0	0
Zotu20611	Bacteria	Rokubacteria	NC10	Methylomirabilales	Methylomirabilaceae	Sh765B-TzT-35	0	0	0	0	0	0	0	0	0	0	0	0	0	0	0	0	0	0	0	0	0	0	0	0	0	0	0	0	0	0	0	0	0	0	0	0	0	0	0	0	0	0	0
Zotu20730	Bacteria	Verrucomicrobia	Verrucomicrobiae	Methylacidiphilales	Methylacidiphilaceae	uncultured	0	0	0	0	0	0	0	0	0	0	0	0	0	0	0	0	0	0	0	0	0	0	0	0	0	0	0	0	0	2	2	0	0	0	0	0	0	0	0	0	0	0	0
Zotu21316	Bacteria	Proteobacteria	Gammaproteobacteria	Methylococcales	Methylomonaceae	Methylomicrobium	0	0	0	0	0	0	0	0	0	0	0	0	0	0	0	0	0	0	0	0	0	0	0	0	0	0	0	0	0	1	0	0	0	0	0	0	0	0	0	0	0	0	0
Zotu21473	Bacteria	Proteobacteria	Alphaproteobacteria	Rhizobiales	Beijerinckiaceae	Methylobacterium	0	0	0	0	0	0	0	0	1	0	5	0	1	1	1	0	0	0	2	2	0	1	0	1	1	0	0	1	0	0	0	0	0	0	0	0	0	0	0	0	0	0	0
Zotu2161	Bacteria	Verrucomicrobia	Verrucomicrobiae	Methylacidiphilales	Methylacidiphilaceae	uncultured	12	4	5	37	0	0	0	0	42	2	59	29	139	0	0	0	32	20	8	10	1	9	8	4	0	9	2	26	0	0	0	0	0	3	0	0	0	0	0	0	0	3	0
Zotu21824	Bacteria	Proteobacteria	Gammaproteobacteria	Methylococcales	Methylomonaceae	Crenothrix	0	0	0	0	0	0	0	0	0	0	0	0	0	0	0	0	0	0	0	0	0	0	0	0	0	0	0	0	0	0	0	0	0	0	0	0	0	0	0	0	0	0	0
Zotu22018	Bacteria	Verrucomicrobia	Verrucomicrobiae	Methylacidiphilales	Methylacidiphilaceae	uncultured	0	0	0	0	0	0	0	0	0	0	0	0	0	0	0	0	0	0	1	0	0	0	0	0	0	0	0	0	0	0	0	0	0	0	0	0	0	0	0	0	0	0	0
Zotu2219	Bacteria	Proteobacteria	Alphaproteobacteria	Rhizobiales	Beijerinckiaceae	Methylocella	4	3	0	0	0	0	0	0	0	0	0	1	1	0	0	11	1	1	0	0	0	0	0	0	0	0	1	0	0	0	0	0	0	0	0	0	0	0	0	0	3	0	0
Zotu2326	Bacteria	Proteobacteria	Gammaproteobacteria	Methylococcales	Methylomonaceae	Methylomonaceae_unclassified	0	0	0	0	0	0	0	0	0	0	0	0	0	0	0	0	0	0	12	0	0	0	0	0	0	0	0	0	0	3	3	0	0	0	0	0	0	0	0	0	0	0	0
Zotu2382	Bacteria	Verrucomicrobia	Verrucomicrobiae	Methylacidiphilales	Methylacidiphilaceae	uncultured	17	5	2	4	2	9	0	0	18	0	23	0	92	0	29	18	21	7	2	5	8	1	2	0	1	13	0	12	1	0	0	0	0	18	0	0	0	0	0	0	0	3	0
Zotu2404	Bacteria	Proteobacteria	Alphaproteobacteria	Rhizobiales	Beijerinckiaceae	Methylosinus	0	0	0	0	0	0	0	0	0	0	0	0	0	0	0	0	0	0	0	0	0	0	0	0	0	0	0	0	0	5	24	27	3	0	0	0	1	1	0	0	0	1	0
Zotu242	Bacteria	Rokubacteria	NC10	Methylomirabilales	Methylomirabilaceae	Sh765B-TzT-35	0	0	0	0	1	0	0	0	0	0	0	0	0	0	0	0	0	0	0	0	0	0	0	0	0	0	0	0	0	2	0	2	1	0	0	0	0	67	70	508	0	0	1
Zotu2481	Bacteria	Proteobacteria	Alphaproteobacteria	Rhizobiales	Beijerinckiaceae	Methylosinus	0	0	0	0	0	0	0	0	0	0	0	0	0	0	0	0	0	0	0	0	0	0	0	0	0	0	0	0	0	1	2	0	2	1	0	0	0	0	0	1	0	0	2
Zotu2569	Bacteria	Verrucomicrobia	Verrucomicrobiae	Methylacidiphilales	Methylacidiphilaceae	uncultured	7	18	26	17	0	1	7	4	0	0	0	0	0	0	0	15	0	0	0	5	14	61	43	24	1	19	34	48	0	0	0	0	0	0	0	1	0	0	0	0	4	0	0
Zotu2631	Bacteria	Proteobacteria	Gammaproteobacteria	Methylococcales	Methylomonaceae	Methylomonaceae_unclassified	0	0	0	0	0	0	0	0	0	0	0	0	0	0	0	0	0	0	0	0	0	0	0	0	0	0	0	0	0	0	0	0	0	0	0	0	0	0	0	0	0	0	0
Zotu2653	Bacteria	Proteobacteria	Gammaproteobacteria	Methylococcales	Methylomonaceae	Methylomonaceae_unclassified	0	0	0	0	0	0	0	0	0	0	0	0	0	0	0	0	0	0	5	0	0	0	0	0	0	0	0	0	0	4	1	0	0	0	0	0	0	0	0	0	0	0	1
Zotu2754	Bacteria	Verrucomicrobia	Verrucomicrobiae	Methylacidiphilales	Methylacidiphilaceae	uncultured	5	1	25	11	6	4	3	0	7	0	27	20	84	0	30	4	14	4	3	2	11	0	0	0	1	20	6	3	0	0	0	0	0	0	0	0	0	0	0	0	0	0	1
Zotu2829	Bacteria	Verrucomicrobia	Verrucomicrobiae	Methylacidiphilales	Methylacidiphilaceae	uncultured	57	17	13	6	0	0	1	0	16	0	64	1	46	0	12	2	0	0	0	7	7	5	2	3	0	1	2	5	0	0	0	0	0	0	0	0	0	0	0	0	0	0	0
Zotu292	Bacteria	Proteobacteria	Alphaproteobacteria	Rhizobiales	Methyloligellaceae	uncultured	0	0	0	0	174	157	0	0	0	0	0	2	0	0	1	0	45	85	257	5	4	0	0	0	0	0	0	0	1	142	41	40	1	19	0	0	2	0	0	0	1	35	205
Zotu2941	Bacteria	Proteobacteria	Gammaproteobacteria	Methylococcales	Methylomonaceae	Methylomonaceae_unclassified	0	0	0	0	0	0	0	0	0	0	0	0	0	0	0	0	0	0	0	0	0	0	0	0	0	0	0	0	0	4	2	0	0	0	0	0	0	0	0	0	0	0	0
Zotu3	Bacteria	Proteobacteria	Gammaproteobacteria	Methylococcales	Methylomonaceae	Methylobacter	0	0	0	0	1	1	2	0	2	0	0	0	2	0	3	0	3	0	35	0	1	0	0	0	1	0	0	0	1	56	514	237	484	16	2	0	2	1	0	1	1	0	7
Zotu302	Bacteria	Proteobacteria	Gammaproteobacteria	Methylococcales	Methylomonaceae	Methylobacter	0	0	0	0	0	0	0	0	0	0	0	0	0	0	0	0	0	0	0	0	0	0	0	0	0	0	0	0	1	1	1	0	0	0	0	0	0	0	0	0	0	0	6
Zotu3164	Bacteria	Proteobacteria	Gammaproteobacteria	Methylococcales	Methylomonaceae	Methylomonaceae_unclassified	0	0	0	0	0	0	0	0	0	0	0	0	0	0	0	0	0	0	0	0	0	0	0	0	0	0	0	0	0	10	0	0	0	0	0	0	0	0	0	0	0	0	0
Zotu329	Bacteria	Proteobacteria	Gammaproteobacteria	Methylococcales	Methylomonaceae	Methylomonaceae_unclassified	0	0	0	0	0	0	0	0	0	0	0	0	0	0	0	0	0	0	2	0	0	0	0	0	0	0	0	0	0	1	0	0	0	0	0	0	0	0	0	0	0	1	10
Zotu3316	Bacteria	Proteobacteria	Alphaproteobacteria	Rhizobiales	Methyloligellaceae	uncultured	0	0	0	0	0	0	0	0	0	0	0	0	0	0	0	0	0	20	30	1	0	0	0	0	0	0	0	0	0	2	1	0	0	0	0	0	0	0	0	0	0	22	24
Zotu3343	Bacteria	Rokubacteria	NC10	Methylomirabilales	Methylomirabilaceae	Sh765B-TzT-35	0	0	0	0	0	0	0	0	0	0	0	0	0	0	0	0	0	1	4	0	0	0	0	0	0	0	0	0	0	0	0	0	0	0	0	0	0	0	0	0	0	13	34
Zotu336	Bacteria	Proteobacteria	Gammaproteobacteria	Methylococcales	Methylomonaceae	Crenothrix	0	0	0	0	0	0	0	0	0	0	0	0	0	0	0	0	0	0	2	0	0	0	0	0	0	0	0	0	0	0	7	2	3	0	0	0	0	0	0	0	0	0	0
Zotu3455	Bacteria	Verrucomicrobia	Verrucomicrobiae	Methylacidiphilales	Methylacidiphilaceae	uncultured	1	0	0	3	0	0	0	0	76	5	34	0	82	2	6	0	4	0	0	2	2	1	0	15	1	3	2	17	4	0	0	0	0	0	0	0	0	0	0	0	0	3	0
Zotu3589	Bacteria	Verrucomicrobia	Verrucomicrobiae	Methylacidiphilales	Methylacidiphilaceae	uncultured	3	0	3	9	0	0	1	7	34	17	5	4	19	48	1	0	3	1	2	1	0	1	8	16	1	4	0	37	1	0	0	0	0	1	0	0	0	0	0	0	0	1	0
Zotu3615	Bacteria	Verrucomicrobia	Verrucomicrobiae	Methylacidiphilales	Methylacidiphilaceae	uncultured	12	5	2	0	0	0	0	0	5	1	15	2	6	0	14	1	6	14	4	13	13	5	7	4	1	7	13	12	0	0	0	0	0	8	0	0	0	1	0	0	0	2	0
Zotu3768	Bacteria	Proteobacteria	Gammaproteobacteria	Methylococcales	Methylomonaceae	Crenothrix	0	0	0	0	0	0	0	0	0	0	0	0	0	0	0	0	0	0	0	0	0	0	0	0	0	0	0	0	0	0	0	0	0	0	0	0	0	0	0	0	0	0	0
Zotu3812	Bacteria	Verrucomicrobia	Verrucomicrobiae	Methylacidiphilales	Methylacidiphilaceae	uncultured	2	0	0	4	1	0	1	0	56	0	122	0	17	0	0	3	2	5	0	1	1	4	1	0	0	1	0	7	0	0	0	0	0	2	0	0	0	0	0	0	0	0	0
Zotu3924	Bacteria	Verrucomicrobia	Verrucomicrobiae	Methylacidiphilales	Methylacidiphilaceae	uncultured	0	0	3	8	0	0	0	0	16	18	4	5	0	80	0	0	0	0	0	0	0	2	0	30	9	0	0	38	1	0	0	0	0	3	0	0	0	1	0	0	0	0	0
Zotu3982	Bacteria	Verrucomicrobia	Verrucomicrobiae	Methylacidiphilales	Methylacidiphilaceae	uncultured	18	16	2	15	0	0	18	6	15	16	3	18	1	0	4	7	0	0	0	0	5	0	2	0	0	4	2	0	0	0	0	0	0	1	0	0	0	0	0	0	0	0	0
Zotu3999	Bacteria	Verrucomicrobia	Verrucomicrobiae	Methylacidiphilales	Methylacidiphilaceae	uncultured	1	0	0	1	1	0	1	2	0	0	1	0	0	0	0	0	2	0	2	2	3	1	1	0	0	0	0	0	0	0	0	0	0	109	0	0	0	11	0	0	0	0	0
Zotu4082	Bacteria	Proteobacteria	Gammaproteobacteria	Methylococcales	Methylomonaceae	Crenothrix	0	0	0	0	0	0	0	0	0	0	0	0	0	0	0	0	0	0	0	0	0	0	0	0	0	0	0	0	0	0	0	0	0	0	0	0	0	0	0	0	0	0	0
Zotu4130	Bacteria	Proteobacteria	Gammaproteobacteria	Methylococcales	Methylomonaceae	Methylomonaceae_unclassified	0	0	0	0	0	0	0	0	0	0	0	0	0	0	0	0	0	0	6	0	0	0	0	0	0	0	0	0	0	0	0	0	0	0	0	0	0	0	0	0	0	1	0
Zotu4145	Bacteria	Verrucomicrobia	Verrucomicrobiae	Methylacidiphilales	Methylacidiphilaceae	uncultured	0	0	2	1	0	0	18	0	3	0	0	0	0	0	0	0	0	0	0	0	3	6	3	1	0	2	0	0	0	0	0	0	0	14	0	0	0	4	0	0	0	0	0
Zotu4283	Bacteria	Verrucomicrobia	Verrucomicrobiae	Methylacidiphilales	Methylacidiphilaceae	uncultured	8	15	9	5	0	0	19	31	0	4	0	7	1	0	0	1	0	0	0	0	0	1	6	0	3	0	0	0	0	0	0	0	0	0	0	0	0	0	0	0	0	0	0
Zotu4347	Bacteria	Proteobacteria	Gammaproteobacteria	Methylococcales	Methylomonaceae	Methylomonaceae_unclassified	0	0	0	0	0	0	0	0	0	0	0	0	0	0	0	0	0	0	0	0	0	0	0	0	0	0	0	0	0	5	2	0	0	0	0	0	0	0	0	0	0	0	0
Zotu4383	Bacteria	Proteobacteria	Gammaproteobacteria	Methylococcales	Methylomonaceae	Crenothrix	0	0	0	0	0	0	0	0	0	0	0	0	0	0	0	0	0	0	0	0	0	0	0	0	0	0	0	0	0	2	0	0	0	0	0	0	0	0	0	0	0	0	0
Zotu4696	Bacteria	Verrucomicrobia	Verrucomicrobiae	Methylacidiphilales	Methylacidiphilaceae	uncultured	6	0	0	1	0	0	0	0	0	0	6	0	0	0	3	0	0	4	0	7	10	4	0	0	0	12	11	0	0	0	0	0	0	0	0	0	0	0	0	0	0	0	0
Zotu4724	Bacteria	Verrucomicrobia	Verrucomicrobiae	Methylacidiphilales	Methylacidiphilaceae	uncultured	7	0	1	5	0	0	0	0	68	0	5	0	48	1	1	0	0	0	0	0	0	0	0	1	0	0	0	26	0	0	0	0	0	0	0	0	0	0	0	0	0	0	0
Zotu4758	Bacteria	Proteobacteria	Gammaproteobacteria	Methylococcales	Methylomonaceae	Methylovulum	0	0	0	0	0	0	0	0	0	0	0	0	0	0	0	0	0	0	0	0	0	0	0	0	0	0	0	0	0	0	1	0	0	0	0	0	0	0	0	0	0	0	0
Zotu481	Bacteria	Proteobacteria	Gammaproteobacteria	Methylococcales	Methylomonaceae	Methylobacter	0	0	0	0	0	0	0	0	0	0	0	0	0	0	0	0	0	0	0	0	0	0	0	0	0	0	0	0	0	0	0	0	2	0	0	0	0	0	0	0	0	0	0
Zotu4841	Bacteria	Proteobacteria	Alphaproteobacteria	Rhizobiales	Beijerinckiaceae	Methylocapsa	0	0	0	0	0	0	0	0	0	1	0	0	0	1	1	7	0	0	0	0	1	3	3	13	6	15	81	9	0	0	0	0	0	0	0	0	0	0	0	0	0	0	0
Zotu4877	Bacteria	Rokubacteria	NC10	Methylomirabilales	Methylomirabilaceae	Sh765B-TzT-35	0	0	0	0	0	0	0	0	0	0	0	0	0	0	0	0	0	0	1	0	0	0	0	0	0	0	0	0	0	7	0	0	0	0	0	0	0	0	0	0	0	0	2
Zotu52	Bacteria	Proteobacteria	Alphaproteobacteria	Rhizobiales	Beijerinckiaceae	Methylocystis	1	0	0	0	3	1	0	0	7	0	17	0	4	1	2	4	4	4	35	1	4	1	0	0	0	0	0	3	0	7	4	2	1	26	3	1	4	646	1095	764	25	35	73
Zotu5220	Bacteria	Proteobacteria	Gammaproteobacteria	Methylococcales	Methylomonaceae	Methylobacter	0	0	0	0	0	0	0	0	0	0	0	0	0	0	0	0	0	0	0	0	0	0	0	0	0	0	0	0	0	4	0	0	0	0	0	0	0	0	0	0	0	0	0
Zotu529	Bacteria	Proteobacteria	Gammaproteobacteria	Methylococcales	Methylomonaceae	Methylomonaceae_unclassified	0	0	0	0	0	0	0	0	0	0	0	0	0	0	0	0	0	0	0	0	0	0	0	0	0	0	0	0	0	0	0	0	1	0	0	0	590	0	0	1	0	0	0
Zotu540	Bacteria	Verrucomicrobia	Verrucomicrobiae	Methylacidiphilales	Methylacidiphilaceae	uncultured	75	23	26	25	18	7	5	0	334	8	139	8	147	21	74	11	89	28	11	33	70	40	34	31	10	130	89	33	0	0	0	0	0	16	0	0	1	2	0	0	4	109	1
Zotu541	Bacteria	Proteobacteria	Gammaproteobacteria	Methylococcales	Methylomonaceae	Crenothrix	0	0	0	0	0	0	0	0	0	0	0	0	0	0	0	0	0	3	54	0	0	0	0	0	0	0	0	0	0	14	2	0	0	0	0	0	0	0	0	0	0	0	3
Zotu5624	Bacteria	Proteobacteria	Gammaproteobacteria	Methylococcales	Methylomonaceae	Methylomonas	0	0	0	0	0	0	0	0	0	0	0	0	0	0	0	0	0	0	0	0	0	0	0	0	0	0	0	0	0	1	0	0	8	0	0	0	0	0	0	0	0	0	0
Zotu595	Bacteria	Verrucomicrobia	Verrucomicrobiae	Methylacidiphilales	Methylacidiphilaceae	uncultured	153	74	75	42	10	7	47	55	160	16	202	25	54	10	57	17	31	49	12	38	55	100	59	24	12	133	120	28	1	0	0	0	0	1	0	0	0	3	0	0	1	28	1
Zotu607	Bacteria	Proteobacteria	Alphaproteobacteria	Rhizobiales	Beijerinckiaceae	Methylocystis	0	0	0	0	2	2	0	0	2	0	2	0	7	0	0	0	5	3	30	1	0	0	0	0	0	1	0	1	0	62	157	170	5	9	0	0	2	0	0	1	0	5	35
Zotu6293	Bacteria	Verrucomicrobia	Verrucomicrobiae	Methylacidiphilales	Methylacidiphilaceae	uncultured	0	0	0	0	0	0	0	0	0	0	0	0	0	0	0	0	0	1	5	1	0	0	2	47	2	0	0	0	0	0	0	0	0	0	0	0	0	0	0	0	1	0	0
Zotu6447	Bacteria	Proteobacteria	Gammaproteobacteria	Methylococcales	Methylomonaceae	Methylomonaceae_unclassified	0	0	0	0	0	0	0	0	0	0	0	0	0	0	0	0	0	0	0	0	0	0	0	0	0	0	0	0	0	0	0	0	0	0	0	0	0	0	0	0	0	0	0
Zotu6519	Bacteria	Proteobacteria	Alphaproteobacteria	Rhizobiales	Beijerinckiaceae	Methylocella	1	0	0	0	1	0	0	0	0	0	0	0	0	0	4	3	0	5	2	6	6	2	0	0	0	4	0	0	0	0	0	0	0	0	0	0	0	0	0	0	0	9	0
Zotu6523	Bacteria	Rokubacteria	NC10	Methylomirabilales	Methylomirabilaceae	Sh765B-TzT-35	0	0	0	0	0	0	0	0	0	0	0	0	0	0	0	0	0	1	5	0	0	0	0	0	0	0	0	0	0	0	0	0	0	0	0	0	0	0	0	0	0	4	16
Zotu662	Bacteria	Rokubacteria	NC10	Methylomirabilales	Methylomirabilaceae	Sh765B-TzT-35	0	0	0	0	0	0	0	0	0	0	0	0	0	0	0	0	0	18	253	4	0	0	0	0	0	0	0	0	0	28	0	0	0	0	0	0	0	1	1	5	0	71	194
Zotu6691	Bacteria	Verrucomicrobia	Verrucomicrobiae	Methylacidiphilales	Methylacidiphilaceae	uncultured	1	0	4	0	2	2	1	0	0	0	0	0	23	0	1	7	0	0	0	2	8	3	6	0	0	2	1	0	0	0	0	0	0	0	0	0	0	0	0	0	0	0	0
Zotu6790	Bacteria	Verrucomicrobia	Verrucomicrobiae	Methylacidiphilales	Methylacidiphilaceae	uncultured	1	0	1	0	0	0	0	0	7	0	12	0	45	1	2	0	2	0	0	0	1	0	3	0	2	1	1	0	0	0	0	0	0	1	0	0	0	0	0	0	0	0	0
Zotu6859	Bacteria	Proteobacteria	Gammaproteobacteria	Methylococcales	Methylomonaceae	Methylobacter	0	0	0	0	1	0	0	0	0	0	0	0	0	0	0	0	0	0	0	0	0	0	0	0	0	0	0	0	0	33	0	0	0	1	0	0	1	0	0	0	0	0	0
Zotu6927	Bacteria	Proteobacteria	Alphaproteobacteria	Rhizobiales	Beijerinckiaceae	Methylobacterium	0	0	0	0	0	0	0	0	2	0	7	0	1	0	0	0	0	0	0	0	0	2	0	1	0	0	0	0	0	17	0	0	1	23	1	0	4	0	0	0	0	0	0
Zotu736	Bacteria	Verrucomicrobia	Verrucomicrobiae	Methylacidiphilales	Methylacidiphilaceae	uncultured	42	9	10	5	3	5	14	24	112	1	168	4	55	1	85	8	12	6	1	3	14	17	27	6	0	6	16	11	0	0	0	0	0	14	0	0	0	0	0	0	3	0	0
Zotu7386	Bacteria	Verrucomicrobia	Verrucomicrobiae	Methylacidiphilales	Methylacidiphilaceae	uncultured	13	13	2	2	0	0	3	2	0	0	0	0	3	0	21	4	0	0	0	0	0	0	0	0	0	0	0	0	0	0	0	0	0	0	0	0	0	1	0	0	0	0	0
Zotu7473	Bacteria	Verrucomicrobia	Verrucomicrobiae	Methylacidiphilales	Methylacidiphilaceae	uncultured	0	0	0	0	0	0	0	0	2	0	15	0	21	0	0	0	6	0	0	0	0	0	0	0	1	17	2	5	0	0	0	0	0	3	0	0	0	5	0	4	0	0	0
Zotu7615	Bacteria	Verrucomicrobia	Verrucomicrobiae	Methylacidiphilales	Methylacidiphilaceae	uncultured	18	0	1	0	0	0	0	0	0	0	0	0	0	1	30	6	0	0	0	1	1	1	0	0	0	3	7	0	0	0	0	0	0	0	0	0	0	0	0	0	0	0	0
Zotu7714	Bacteria	Verrucomicrobia	Verrucomicrobiae	Methylacidiphilales	Methylacidiphilaceae	uncultured	3	5	7	9	0	0	8	27	0	1	0	0	0	0	0	0	0	0	0	0	0	0	3	0	0	0	2	0	0	0	0	0	0	0	0	0	0	0	0	0	0	0	0
Zotu7761	Bacteria	Verrucomicrobia	Verrucomicrobiae	Methylacidiphilales	Methylacidiphilaceae	uncultured	10	0	1	0	0	0	0	0	30	3	22	0	1	0	4	1	0	0	0	0	0	0	0	0	0	0	0	6	0	0	0	0	0	0	0	0	0	0	0	0	0	0	0
Zotu7814	Bacteria	Rokubacteria	NC10	Methylomirabilales	Methylomirabilaceae	Sh765B-TzT-35	0	0	0	0	0	0	0	0	0	0	0	0	0	0	0	0	0	0	0	0	0	0	0	0	0	0	0	0	0	0	0	0	0	0	0	0	0	0	0	0	0	1	3
Zotu7895	Bacteria	Proteobacteria	Gammaproteobacteria	Methylococcales	Methylomonaceae	Methylomonaceae_unclassified	0	0	0	0	0	0	0	0	0	0	0	0	0	0	0	0	0	0	0	0	0	0	0	0	0	0	0	0	0	0	0	0	0	0	0	0	0	0	0	0	0	0	0
Zotu7900	Bacteria	Verrucomicrobia	Verrucomicrobiae	Methylacidiphilales	Methylacidiphilaceae	uncultured	0	0	0	0	0	0	0	0	2	0	11	0	4	0	0	1	3	0	0	1	0	0	0	0	0	0	1	1	0	0	0	0	0	0	0	0	0	3	7	0	0	13	1
Zotu7917	Bacteria	Verrucomicrobia	Verrucomicrobiae	Methylacidiphilales	Methylacidiphilaceae	uncultured	13	0	32	9	0	0	1	0	5	0	2	0	1	0	5	10	0	0	0	1	2	7	1	0	0	0	0	0	0	0	0	0	0	0	0	0	0	0	0	0	0	0	0
Zotu8214	Bacteria	Verrucomicrobia	Verrucomicrobiae	Methylacidiphilales	Methylacidiphilaceae	uncultured	0	0	0	4	0	0	0	0	0	0	2	0	5	0	2	0	28	0	0	0	0	0	0	0	1	17	3	1	0	0	0	0	0	0	0	0	0	0	0	0	0	0	0
Zotu8217	Bacteria	Verrucomicrobia	Verrucomicrobiae	Methylacidiphilales	Methylacidiphilaceae	uncultured	1	0	0	3	0	0	0	0	1	0	4	0	5	0	2	0	1	0	0	0	0	0	0	0	5	52	0	0	0	0	0	0	0	3	0	0	0	0	0	0	0	0	0
Zotu8337	Bacteria	Proteobacteria	Gammaproteobacteria	Methylococcales	Methylomonaceae	Methylomonaceae_unclassified	0	0	0	0	6	2	0	0	0	0	0	0	0	0	0	0	0	0	0	0	0	0	0	0	0	0	0	0	0	0	0	0	0	0	0	0	0	0	0	0	0	0	0
Zotu8347	Bacteria	Verrucomicrobia	Verrucomicrobiae	Methylacidiphilales	Methylacidiphilaceae	uncultured	0	0	0	0	1	0	0	0	0	0	0	0	0	0	0	0	0	0	0	0	0	0	0	0	0	0	0	0	0	0	2	0	0	0	0	0	0	0	0	0	0	1	15
Zotu8356	Bacteria	Verrucomicrobia	Verrucomicrobiae	Methylacidiphilales	Methylacidiphilaceae	uncultured	0	0	0	2	0	0	0	0	5	0	14	1	20	0	0	4	6	0	0	0	0	0	0	0	0	5	1	5	0	0	0	0	0	0	0	0	0	0	0	0	0	3	0
Zotu8781	Bacteria	Verrucomicrobia	Verrucomicrobiae	Methylacidiphilales	Methylacidiphilaceae	uncultured	3	0	0	0	0	0	0	0	0	1	0	0	0	0	0	0	0	0	0	9	21	1	0	0	0	1	0	0	0	0	0	0	0	1	0	0	0	0	0	0	0	0	0
Zotu8965	Bacteria	Verrucomicrobia	Verrucomicrobiae	Methylacidiphilales	Methylacidiphilaceae	uncultured	2	0	0	2	0	0	0	0	2	0	18	0	4	0	1	0	1	0	0	1	0	6	0	0	1	9	0	0	0	0	0	0	0	0	0	0	0	0	0	0	0	4	0
Zotu901	Bacteria	Verrucomicrobia	Verrucomicrobiae	Methylacidiphilales	Methylacidiphilaceae	uncultured	100	57	18	30	18	23	43	8	66	17	222	3	130	12	24	30	27	45	17	23	40	26	22	7	10	90	45	40	0	0	0	0	0	1	0	0	0	0	0	1	1	23	3
Zotu9045	Bacteria	Verrucomicrobia	Verrucomicrobiae	Methylacidiphilales	Methylacidiphilaceae	uncultured	0	0	2	4	0	0	2	0	10	0	22	0	5	0	1	0	0	0	0	0	0	0	0	3	1	5	0	9	0	0	0	0	0	0	0	0	0	0	0	0	0	0	0
Zotu9316	Bacteria	Verrucomicrobia	Verrucomicrobiae	Methylacidiphilales	Methylacidiphilaceae	uncultured	23	0	0	0	0	0	0	0	0	0	0	0	0	0	15	3	0	1	0	12	16	1	0	0	0	1	1	0	0	0	0	0	0	0	0	0	0	0	0	0	0	0	0
Zotu938	Bacteria	Verrucomicrobia	Verrucomicrobiae	Methylacidiphilales	Methylacidiphilaceae	uncultured	21	0	43	92	7	1	3	0	116	2	313	2	135	9	13	1	18	20	4	26	8	48	22	114	11	46	8	215	9	0	0	0	0	0	0	0	0	0	0	0	0	4	0
Zotu9393	Bacteria	Proteobacteria	Gammaproteobacteria	Methylococcales	Methylomonaceae	Methylomonaceae_unclassified	0	0	0	0	0	0	0	0	0	0	0	0	0	0	0	0	0	0	0	0	0	0	0	0	0	0	0	0	0	0	0	0	0	0	0	0	0	0	0	0	0	0	0
Zotu951	Bacteria	Verrucomicrobia	Verrucomicrobiae	Methylacidiphilales	Methylacidiphilaceae	uncultured	141	90	0	0	0	0	9	24	0	0	0	0	0	0	19	1	0	0	0	7	39	8	12	0	2	6	10	0	0	0	0	0	0	6	6	4	0	31	15	2	4	1	0
Zotu9860	Bacteria	Verrucomicrobia	Verrucomicrobiae	Methylacidiphilales	Methylacidiphilaceae	uncultured	2	0	0	8	0	0	0	0	13	12	1	2	0	5	7	0	0	0	0	0	0	0	0	0	0	0	0	0	0	0	0	0	0	0	0	0	0	0	0	0	0	0	0
[truncated: 10 more columns]

## Sheet: Table S7 Seq methanogens
							Forest																													Peat												Meadow
						Area	Forest	Forest	Forest	Forest	Forest	Forest	Forest	Forest	Forest	Forest	Forest	Forest	Forest	Forest	Forest	Forest	Forest	Forest	Forest	Forest	Forest	Forest	Forest	Forest	Forest	Forest	Forest	Forest	Forest	Peat	Peat	Peat	Peat	Peat	Peat	Peat	Peat	Peat	Peat	Peat	Peat	Meadow	Meadow
						Site	WA-211	WA-211	WA-211	WA-211	WA-211	WA-211	WA-211	WA-211	WA-211	WA-211	WA-211	WA-211	WA-211	WA-211	WA-209	WA-209	WA-209	WA-273	WA-273	WA-273	WA-273	WA-273	WA-273	WA-273	WA-273	WA-273	WA-273	WA-273	WA-273	WA-272	WA-272	WA-272	WA-272	WA-272	WA-272	WA-272	WA-272	WA-272	WA-272	WA-272	WA-272	WA-275	WA-275
						Category	Well	Well	Well	Well	Well	Well	Well	Well	Reference	Reference	Reference	Reference	Reference	Reference	Well	Well	Well	Well	Well	Well	Well	Well	Well	Reference	Reference	Reference	Reference	Reference	Reference	Well	Well	Well	Well	Well	Well	Well	Well	Reference	Reference	Reference	Reference	Well	Well
						Sample depth	5	9	6	12	6	12	6	12	4	8	6	12	4	8	5	15	15	6	12	6	12	6	12	6	12	6	12	6	12	5	10	15	20	5	10	15	20	5	10	15	15	5	15
						Sample ID	7425	7426	7427	7428	7429	7430	7431	7432	7433	7434	7435	7436	7437	7438	7439	7440	7441	7444	7445	7446	7447	7448	7449	7450	7451	7452	7453	7454	7455	7457	7458	7459	7460	7461	7462	7463	7464	7465	7466	7467	7468	7469	7470
ZOTU.ID	domain	phyla	class	order	family	genus	SJ.2022.1	SJ.2022.2	SJ.2022.3	SJ.2022.4	SJ.2022.5	SJ.2022.6	SJ.2022.7	SJ.2022.8	SJ.2022.9	SJ.2022.10	SJ.2022.11	SJ.2022.12	SJ.2022.13	SJ.2022.14	SJ.2022.15	SJ.2022.16	SJ.2022.17	SJ.2022.18	SJ.2022.19	SJ.2022.20	SJ.2022.21	SJ.2022.22	SJ.2022.23	SJ.2022.24	SJ.2022.25	SJ.2022.26	SJ.2022.27	SJ.2022.28	SJ.2022.29	SJ.2022.30	SJ.2022.31	SJ.2022.32	SJ.2022.33	SJ.2022.34	SJ.2022.35	SJ.2022.36	SJ.2022.37	SJ.2022.38	SJ.2022.39	SJ.2022.40	SJ.2022.41	SJ.2022.42	SJ.2022.43
Zotu400	Archaea	Euryarchaeota	Methanomicrobia	Methanomicrobiales	Methanoregulaceae	Methanoregula	0	0	0	0	0	0	0	0	0	0	0	0	0	0	0	0	0	0	0	0	0	0	0	0	0	0	0	0	0	5	38	178	62	0	0	0	0	0	0	0	0	0	0
Zotu402	Archaea	Euryarchaeota	Thermoplasmata	Methanomassiliicoccales	Methanomassiliicoccaceae	Methanomassiliicoccus	0	0	0	0	0	0	0	0	0	0	0	0	0	0	0	0	0	0	0	0	0	0	0	0	0	0	0	0	0	8	6	4	0	0	0	0	0	0	0	0	0	3	20
Zotu414	Archaea	Euryarchaeota	Methanobacteria	Methanobacteriales	Methanobacteriaceae	Methanobacterium	0	0	0	0	0	0	0	0	0	0	0	0	0	0	0	0	0	0	0	0	0	0	0	0	0	0	0	0	0	0	0	0	0	0	0	0	0	0	0	0	0	0	2
Zotu419	Archaea	Euryarchaeota	Methanomicrobia	Methanomicrobiales	Methanoregulaceae	Methanoregula	0	0	0	0	0	0	0	0	0	0	0	0	0	0	0	0	0	0	0	0	0	0	0	0	0	0	0	0	0	0	0	0	0	0	0	0	0	0	0	0	12	0	0
Zotu422	Archaea	Euryarchaeota	Methanomicrobia	Methanosarcinales	Methanosaetaceae	Methanosaeta	0	0	0	0	0	13	0	0	0	0	0	0	0	0	0	0	0	0	0	0	0	0	0	0	0	0	0	0	0	1	0	0	4	0	0	0	0	0	0	0	0	1	29
Zotu424	Archaea	Euryarchaeota	Methanobacteria	Methanobacteriales	Methanobacteriaceae	Methanobacterium	0	0	0	0	0	13	0	0	0	0	0	0	0	0	0	0	0	0	0	0	0	0	0	0	0	0	0	0	0	5	0	0	0	0	0	0	0	0	0	0	0	1	0
Zotu429	Archaea	Euryarchaeota	Methanomicrobia	Methanomicrobiales	Methanomicrobiales_unclassified	Methanomicrobiales_unclassified	0	0	0	0	0	0	0	0	0	0	0	0	0	0	0	0	0	0	0	0	0	0	0	0	0	0	0	0	0	1	9	51	69	0	0	0	0	0	0	0	0	0	0
Zotu437	Archaea	Euryarchaeota	Methanobacteria	Methanobacteriales	Methanobacteriaceae	Methanobacterium	0	0	0	0	87	37	0	0	0	0	0	0	0	0	0	0	0	0	0	0	0	0	0	0	0	0	0	0	0	4	0	0	0	0	0	0	0	0	0	0	0	0	0
Zotu443	Archaea	Euryarchaeota	Thermoplasmata	Methanomassiliicoccales	Methanomassiliicoccaceae	Methanomassiliicoccus	0	0	0	0	0	0	0	0	0	0	0	0	0	0	0	0	0	5	9	0	0	0	0	0	0	0	0	0	0	0	0	0	0	0	0	0	0	0	0	0	0	0	3
Zotu452	Archaea	Euryarchaeota	Methanomicrobia	Methanocellales	Methanocellaceae	Methanocellaceae_unclassified	0	0	0	0	14	11	0	0	0	0	0	0	0	0	0	0	0	0	1	0	0	0	0	0	0	0	0	0	0	0	0	0	0	0	0	0	0	0	0	0	0	0	0
Zotu455	Archaea	Euryarchaeota	Methanomicrobia	Methanosarcinales	Methanosarcinaceae	Methanosarcina	0	0	0	0	86	3	0	0	0	0	0	0	0	0	0	0	0	0	0	0	0	0	0	0	0	0	0	0	0	16	0	0	0	0	0	0	0	0	0	0	0	0	0
Zotu458	Archaea	Euryarchaeota	Methanomicrobia	Methanocellales	Methanocellaceae	Methanocella	0	0	0	0	13	0	0	0	0	0	0	0	0	0	0	0	1	0	0	0	0	0	0	0	0	2	2	0	0	0	0	0	0	0	0	0	0	0	0	0	0	0	1
Zotu462	Archaea	Euryarchaeota	Thermoplasmata	Methanomassiliicoccales	Methanomassiliicoccaceae	Methanomassiliicoccus	0	0	0	0	0	0	0	0	0	0	0	0	0	0	0	0	0	0	1	0	0	0	0	0	0	0	0	0	0	5	0	0	0	0	0	0	0	0	0	0	0	0	0
Zotu464	Archaea	Euryarchaeota	Methanomicrobia	Methanosarcinales	Methanosarcinaceae	Methanosarcina	0	0	0	0	9	0	0	0	0	0	0	0	0	0	0	0	0	0	0	0	0	0	0	0	0	0	0	0	0	14	0	0	0	0	0	0	0	0	0	0	0	0	6
Zotu465	Archaea	Euryarchaeota	Methanomicrobia	Methanosarcinales	Methanosarcinaceae	Methanosarcina	0	0	0	0	0	0	0	0	0	0	0	0	0	0	0	0	0	0	0	0	0	0	0	0	0	0	0	0	0	138	0	0	0	0	0	0	0	0	0	0	0	0	0
Zotu475	Archaea	Euryarchaeota	Methanomicrobia	Methanosarcinales	Methanosarcinaceae	Methanosarcina	0	0	0	0	0	0	0	0	0	0	0	0	0	0	0	0	0	0	0	0	0	0	0	0	0	0	0	0	0	0	0	0	0	0	0	0	0	0	0	0	62	0	0
Zotu480	Archaea	Euryarchaeota	Methanomicrobia	Methanosarcinales	Methanosarcinaceae	Methanosarcina	0	0	0	0	0	0	0	0	0	0	0	0	0	0	0	0	0	0	0	0	0	0	0	0	0	0	0	0	0	20	0	0	0	0	0	0	0	0	0	0	0	0	0
Zotu486	Archaea	Euryarchaeota	Methanobacteria	Methanobacteriales	Methanobacteriaceae	Methanobacterium	0	0	0	0	69	25	0	0	0	0	0	0	0	0	0	0	0	0	0	0	0	0	0	0	0	0	0	0	0	0	0	0	0	0	0	0	0	0	0	0	0	0	0
Zotu490	Archaea	Euryarchaeota	Thermococci	Methanofastidiosales	Methanofastidiosaceae	Candidatus_Methanofastidiosum	0	0	0	0	0	0	0	0	0	0	0	0	0	0	0	0	0	0	0	0	0	0	0	0	0	0	0	0	0	0	0	0	0	0	0	0	0	0	0	0	0	0	0
Zotu492	Archaea	Euryarchaeota	Methanomicrobia	Methanomicrobiales	Methanoregulaceae	Methanoregula	0	0	0	0	0	0	0	0	0	0	0	0	0	0	0	0	0	0	0	0	0	0	0	0	0	0	0	0	0	0	0	0	0	0	0	0	0	0	0	0	58	0	0
Zotu596	Archaea	Euryarchaeota	Thermoplasmata	Methanomassiliicoccales	Methanomassiliicoccaceae	Methanomassiliicoccus	0	0	0	0	15	0	0	0	0	0	0	0	0	0	0	0	0	0	0	0	0	0	0	0	0	0	0	0	0	2	0	0	0	0	0	0	0	0	0	0	0	0	0
Zotu603	Archaea	Euryarchaeota	Methanomicrobia	Methanomicrobiales	Methanoregulaceae	Methanoregula	0	0	0	0	0	0	0	0	0	0	0	0	0	0	0	0	0	0	0	0	0	0	0	0	0	0	0	0	0	2	1	16	104	0	0	0	0	0	0	0	0	0	0
Zotu616	Archaea	Euryarchaeota	Methanomicrobia	Methanosarcinales	Methanosaetaceae	Methanosaeta	0	0	0	0	4	0	0	0	0	0	0	0	0	0	0	0	0	0	0	0	0	0	0	0	0	0	0	0	0	3	0	0	0	0	0	0	0	0	0	0	0	0	0
Zotu626	Archaea	Euryarchaeota	Methanomicrobia	Methanomicrobiales	Methanomicrobiales_unclassified	Methanomicrobiales_unclassified	0	0	0	0	0	0	0	0	0	0	0	0	0	0	0	0	0	0	0	0	0	0	0	0	0	0	0	0	0	0	0	8	58	0	0	0	0	0	0	0	0	0	0
Zotu627	Archaea	Euryarchaeota	Methanomicrobia	Methanomicrobiales	Methanomicrobiales_unclassified	Methanomicrobiales_unclassified	0	0	0	0	0	0	0	0	0	0	0	0	0	0	0	0	0	0	0	0	0	0	0	0	0	0	0	0	0	1	1	1	0	0	0	0	0	0	0	0	0	0	4
Zotu630	Archaea	Euryarchaeota	Thermoplasmata	Methanomassiliicoccales	Methanomassiliicoccaceae	Methanomassiliicoccus	0	0	0	0	0	0	0	0	0	0	0	0	0	0	0	0	27	4	1	0	0	0	0	0	0	0	0	0	0	0	0	0	0	0	0	0	0	0	0	0	0	0	0
Zotu637	Archaea	Euryarchaeota	Methanomicrobia	Methanocellales	Methanocellaceae	Methanocellaceae_unclassified	0	0	0	0	0	0	0	0	0	0	0	0	0	0	0	0	0	6	3	2	1	0	0	0	0	0	0	0	0	0	0	0	0	0	0	0	0	0	0	0	0	0	1
Zotu644	Archaea	Euryarchaeota	Methanomicrobia	Methanomicrobiales	Methanoregulaceae	Methanoregula	0	0	0	0	0	0	0	0	0	0	0	0	0	0	0	0	0	0	0	0	0	0	0	0	0	0	0	0	0	0	12	13	84	0	0	0	0	0	0	0	41844	0	0
Zotu650	Archaea	Euryarchaeota	Methanomicrobia	Methanomicrobiales	Methanoregulaceae	Methanoregula	0	0	0	0	0	0	0	0	0	0	0	0	0	0	0	0	0	0	0	0	0	0	0	0	0	0	0	0	0	0	0	0	0	0	0	0	0	0	0	0	0	0	0
Zotu652	Archaea	Euryarchaeota	Methanomicrobia	Methanomicrobiales	Methanoregulaceae	Methanoregula	0	0	0	0	0	0	0	0	0	0	0	0	0	0	0	0	0	0	0	0	0	0	0	0	0	0	0	0	0	0	0	0	0	0	0	0	0	0	0	0	33	0	0
Zotu671	Archaea	Euryarchaeota	Methanobacteria	Methanobacteriales	Methanobacteriaceae	Methanobacterium	0	0	0	0	50	8	0	0	0	0	0	0	0	0	0	0	0	0	0	0	0	0	0	0	0	0	0	0	0	0	0	0	0	0	0	0	0	0	0	0	0	0	0
Zotu683	Archaea	Euryarchaeota	Methanobacteria	Methanobacteriales	Methanobacteriaceae	Methanobacterium	0	0	0	0	30	0	0	0	0	0	0	0	0	0	0	0	0	0	0	0	0	0	0	0	0	0	0	0	0	3	0	0	0	0	0	0	0	0	0	0	0	0	0
Zotu685	Archaea	Euryarchaeota	Methanomicrobia	Methanomicrobiales	Methanoregulaceae	Methanoregula	0	0	0	0	1	0	0	0	0	0	0	0	0	0	0	0	0	0	0	0	0	0	0	0	0	0	0	0	0	374	4128	10792	20799	468	924	1259	879	3	4	4	773	0	6
Zotu692	Archaea	Euryarchaeota	Methanomicrobia	Methanomicrobiales	Methanomicrobiales_unclassified	Methanomicrobiales_unclassified	0	0	0	0	0	0	0	0	0	0	0	0	0	0	0	0	0	0	0	0	0	0	0	0	0	0	0	0	0	1	7	19	48	0	0	0	0	0	0	0	0	0	0
Zotu695	Archaea	Euryarchaeota	Methanomicrobia	Methanosarcinales	Methanosaetaceae	Methanosaeta	0	0	0	0	0	0	0	0	0	0	0	0	0	0	0	0	0	0	0	0	0	0	0	0	0	0	0	0	0	0	0	0	0	0	0	0	0	0	0	0	0	18	4
Zotu216	Archaea	Euryarchaeota	Thermoplasmata	Methanomassiliicoccales	Methanomassiliicoccaceae	Methanomassiliicoccus	0	0	0	0	89	29	0	0	0	0	0	0	0	0	0	0	0	13	7	4	0	0	0	0	0	0	0	0	0	104	0	0	0	0	0	0	0	0	0	0	0	5	18
Zotu221	Archaea	Euryarchaeota	Methanomicrobia	Methanocellales	Methanocellaceae	Methanocella	0	0	0	0	655	162	0	0	0	0	0	0	0	0	0	0	0	0	7	0	0	0	0	0	0	0	0	0	0	1	0	0	0	0	0	0	0	0	0	0	0	0	0
Zotu225	Archaea	Euryarchaeota	Methanomicrobia	Methanosarcinales	Methanosarcinaceae	Methanosarcina	0	0	0	0	0	6	0	0	0	0	0	0	0	0	0	0	0	0	2	0	0	0	0	0	0	0	0	0	0	114	0	0	0	0	0	0	0	0	0	0	0	0	4
Zotu230	Archaea	Crenarchaeota	Verstraetearchaeia	Methanomethyliales	Methanomethyliaceae	Candidatus_Methanomethylicus	0	0	0	0	0	0	0	0	0	0	0	0	0	0	0	0	0	0	0	0	0	0	0	0	0	0	0	0	0	0	0	0	0	0	0	0	0	0	0	2	0	0	0
Zotu236	Archaea	Euryarchaeota	Methanomicrobia	Methanocellales	Methanocellaceae	Methanocella	0	0	0	0	0	0	0	0	0	0	0	0	0	0	0	0	302	14	5	13	8	0	0	0	0	0	0	0	0	0	0	0	0	0	0	0	0	0	0	0	0	10	33
Zotu245	Archaea	Euryarchaeota	Methanomicrobia	Methanocellales	Methanocellaceae	Methanocella	0	0	0	0	0	0	0	0	0	0	0	0	0	0	0	0	0	0	0	0	0	0	0	0	0	0	0	0	0	4	0	0	0	0	0	0	0	0	0	0	0	0	0
Zotu254	Archaea	Euryarchaeota	Methanomicrobia	Methanosarcinales	Methanosarcinaceae	Methanosarcina	0	0	0	0	532	27	0	0	0	0	0	0	0	0	0	0	1	3	0	0	0	0	0	0	0	0	0	0	0	25	0	0	0	0	0	0	0	0	0	0	0	0	0
Zotu255	Archaea	Euryarchaeota	Methanomicrobia	Methanosarcinales	Methanosaetaceae	Methanosaeta	0	0	0	0	16	6	0	0	0	0	0	0	0	0	0	0	0	0	2	2	0	0	0	0	0	0	0	0	0	68	1	0	7	0	0	0	0	0	0	0	0	1	0
Zotu263	Archaea	Euryarchaeota	Methanomicrobia	Methanosarcinales	Methanosaetaceae	Methanosaeta	0	0	0	0	0	10	0	0	0	0	0	0	0	0	0	0	0	0	0	0	0	0	0	0	0	0	0	0	0	4	0	0	26	0	0	0	0	0	0	0	0	18	123
Zotu282	Archaea	Euryarchaeota	Methanomicrobia	Methanosarcinales	Methanosarcinaceae	Methanosarcina	0	0	0	0	37	3	0	0	0	0	0	0	0	0	0	0	0	0	3	0	0	0	0	0	0	0	0	0	0	28	0	0	0	0	0	0	0	0	0	0	0	0	4
Zotu286	Archaea	Euryarchaeota	Methanobacteria	Methanobacteriales	Methanobacteriaceae	Methanobacterium	0	0	0	0	0	0	0	0	0	0	0	0	0	0	0	0	0	0	0	0	0	0	0	0	0	0	0	0	0	5	0	0	0	0	0	0	0	0	0	0	0	0	1
Zotu291	Archaea	Euryarchaeota	Methanomicrobia	Methanosarcinales	Methanosarcinaceae	Methanosarcina	0	0	0	0	3	12	0	0	0	0	0	0	0	0	0	0	0	0	1	0	0	0	0	0	0	0	0	0	0	94	11	18	0	0	0	0	0	0	0	0	0	0	0
Zotu294	Archaea	Euryarchaeota	Methanomicrobia	Methanosarcinales	Methanosaetaceae	Methanosaeta	0	0	0	0	0	0	0	0	0	0	0	0	0	0	0	0	0	0	0	0	0	0	0	0	0	0	0	0	0	34	18	9	1	0	0	0	0	0	0	0	0	0	1
Zotu6	Archaea	Euryarchaeota	Methanomicrobia	Methanosarcinales	Methanosarcinaceae	Methanosarcina	0	0	0	0	0	0	0	0	0	0	0	0	0	0	0	0	1	0	0	0	0	0	0	0	0	0	0	0	0	0	0	0	0	0	0	0	0	0	0	0	12661	38	0
Zotu8	Archaea	Euryarchaeota	Methanomicrobia	Methanosarcinales	Methanosarcinaceae	Methanosarcina	0	0	0	0	34	60	0	0	0	0	0	0	0	0	0	0	307	363	269	28	6	1	0	0	0	0	0	0	0	82	0	0	0	28	0	0	1	0	0	0	0	4295	6357
Zotu11	Archaea	Euryarchaeota	Methanomicrobia	Methanosarcinales	Methanosarcinaceae	Methanosarcina	0	0	0	0	0	0	0	0	0	0	0	0	0	0	0	0	0	0	0	0	0	0	0	0	0	0	0	0	0	0	0	0	0	0	0	0	0	0	0	0	6619	16	0
Zotu13	Archaea	Euryarchaeota	Methanomicrobia	Methanosarcinales	Methanosaetaceae	Methanosaeta	0	0	0	0	0	0	1	0	0	0	0	0	0	0	0	0	58	0	2	0	0	0	0	0	0	0	0	0	0	2829	1705	1870	252	50	1	0	4	0	0	0	0	1009	5033
Zotu15	Archaea	Euryarchaeota	Methanomicrobia	Methanosarcinales	Methanosaetaceae	Methanosaeta	0	0	0	0	17	0	0	0	0	0	0	0	0	0	0	0	0	0	3	0	0	0	0	0	0	0	0	0	0	79	1	0	981	11	0	0	0	0	0	0	0	552	7096
Zotu17	Archaea	Euryarchaeota	Methanobacteria	Methanobacteriales	Methanobacteriaceae	Methanobacterium	0	0	0	0	330	167	0	0	0	0	0	0	0	0	0	0	374	32	44	3	1	0	0	0	0	0	0	0	0	39	1	0	0	0	0	0	0	0	0	0	1103	672	839
Zotu18	Archaea	Euryarchaeota	Methanomicrobia	Methanosarcinales	Methanosarcinaceae	Methanosarcina	0	0	0	0	0	0	0	0	0	0	0	0	0	0	0	0	0	0	0	0	0	0	0	0	0	0	0	0	0	0	0	0	0	0	0	0	0	0	0	0	2485	0	0
Zotu25	Archaea	Euryarchaeota	Methanomicrobia	Methanosarcinales	Methanosarcinaceae	Methanosarcina	0	0	0	0	37	54	2	0	0	0	0	0	0	0	0	0	0	92	151	5	1	0	0	0	0	0	0	0	0	14	0	0	1	10	0	0	2	0	0	0	1	1105	62
Zotu31	Archaea	Euryarchaeota	Methanobacteria	Methanobacteriales	Methanobacteriaceae	Methanobacterium	0	0	0	0	259	132	0	0	0	0	0	0	0	0	0	0	19	12	15	2	0	0	0	0	0	0	0	0	0	27	1	0	0	0	0	0	1	0	0	0	9	680	1067
Zotu36	Archaea	Euryarchaeota	Methanobacteria	Methanobacteriales	Methanobacteriaceae	Methanobacterium	19	0	0	0	35	35	0	0	0	0	0	0	0	0	0	0	12	0	1	0	0	0	0	0	0	0	0	0	0	4	0	0	0	0	0	0	0	0	0	0	2420	18	37
Zotu37	Archaea	Euryarchaeota	Methanomicrobia	Methanosarcinales	Methanosaetaceae	Methanosaeta	0	0	0	0	0	0	0	0	0	0	0	0	0	0	0	0	3	0	0	0	0	0	0	0	0	0	0	0	0	781	1683	9878	4629	102	0	0	2	0	0	0	0	0	9
Zotu48	Archaea	Euryarchaeota	Methanomicrobia	Methanosarcinales	Methanosarcinaceae	Methanosarcina	0	0	0	0	315	1105	0	0	0	0	0	0	0	0	0	0	9	6	6	0	0	0	0	0	0	0	0	0	0	10	0	0	0	1	0	0	0	0	0	0	0	13	23
Zotu58	Archaea	Euryarchaeota	Methanomicrobia	Methanosarcinales	Methanosarcinaceae	Methanosarcina	0	0	0	0	344	129	0	0	0	0	0	0	0	0	0	0	0	12	3	1	0	0	0	0	0	0	0	0	0	365	270	191	5	21	0	0	0	0	0	0	0	239	1645
Zotu61	Archaea	Euryarchaeota	Methanomicrobia	Methanosarcinales	Methanosaetaceae	Methanosaeta	0	0	0	0	0	0	0	0	0	0	0	0	0	0	0	0	0	0	1	0	0	0	0	0	0	0	0	0	0	77	8	42	12243	96	1	0	8	1	0	0	0	0	0
Zotu62	Archaea	Euryarchaeota	Methanomicrobia	Methanosarcinales	Methanosaetaceae	Methanosaeta	0	0	0	0	0	0	0	0	0	0	0	0	0	0	0	0	0	0	4	0	0	0	0	0	0	0	0	0	0	1388	64	86	287	0	0	0	0	0	0	0	0	0	0
Zotu87	Archaea	Euryarchaeota	Methanomicrobia	Methanocellales	Methanocellaceae	Methanocella	0	0	0	0	2	3	0	0	0	0	0	0	0	0	0	0	6	185	23	19	9	6	4	0	0	0	0	0	0	6	0	0	0	5	0	0	4	0	0	0	2	320	172
Zotu91	Archaea	Euryarchaeota	Thermoplasmata	Methanomassiliicoccales	Methanomassiliicoccaceae	Methanomassiliicoccus	0	8	0	0	0	0	0	0	0	0	0	0	0	0	0	0	0	0	0	0	0	0	1	0	0	0	0	0	0	0	0	0	0	3	0	0	0	0	0	0	1165	0	0
Zotu92	Archaea	Euryarchaeota	Methanomicrobia	Methanosarcinales	Methanosaetaceae	Methanosaeta	0	0	0	0	0	0	0	0	0	0	0	0	0	0	0	0	0	0	0	0	0	0	0	0	0	0	0	0	0	719	74	78	300	7	0	0	1	0	0	0	0	0	119
Zotu94	Archaea	Euryarchaeota	Methanobacteria	Methanobacteriales	Methanobacteriaceae	Methanobacterium	0	0	0	0	0	0	0	0	0	0	0	0	0	0	0	0	0	0	0	0	0	0	0	0	0	0	0	0	0	0	0	0	0	0	0	0	0	0	0	0	428	2	0
Zotu97	Archaea	Euryarchaeota	Methanobacteria	Methanobacteriales	Methanobacteriaceae	Methanobacterium	0	0	0	0	0	0	0	0	0	0	0	0	0	0	0	0	0	0	0	0	0	0	0	0	0	0	0	0	0	0	0	0	0	0	0	0	0	0	0	0	408	6	12
Zotu504	Archaea	Euryarchaeota	Methanobacteria	Methanobacteriales	Methanobacteriaceae	Methanobrevibacter	0	0	0	0	58	17	0	0	0	0	0	0	0	0	0	0	0	0	0	0	0	0	0	0	0	0	0	0	0	1	0	0	0	0	0	0	0	0	0	0	0	0	0
Zotu505	Archaea	Euryarchaeota	Methanomicrobia	Methanomicrobiales	Methanoregulaceae	Methanoregula	0	0	0	0	0	0	0	0	0	0	0	0	0	0	0	0	0	0	0	0	0	0	0	0	0	0	0	0	0	0	0	0	0	0	0	0	0	0	0	0	12	0	0
Zotu508	Archaea	Euryarchaeota	Methanomicrobia	Methanocellales	Methanocellaceae	Methanocellaceae_unclassified	0	0	0	0	0	0	0	0	0	0	0	0	0	0	0	0	0	3	0	0	3	0	0	0	0	0	0	0	0	0	0	0	0	0	0	0	0	0	0	0	0	0	0
Zotu509	Archaea	Euryarchaeota	Methanomicrobia	Methanocellales	Methanocellaceae	Methanocellaceae_unclassified	0	0	0	0	0	0	0	0	0	0	0	0	0	0	0	0	0	3	4	0	3	0	0	0	0	0	0	0	0	0	0	0	0	0	0	0	0	0	0	0	0	2	4
Zotu531	Archaea	Euryarchaeota	Methanomicrobia	Methanosarcinales	Methanosaetaceae	Methanosaeta	0	0	0	0	0	0	0	0	0	0	0	0	0	0	0	0	0	0	0	0	0	0	0	0	0	0	0	0	0	0	0	0	0	0	0	0	0	0	0	0	0	1	7
Zotu532	Archaea	Euryarchaeota	Methanobacteria	Methanobacteriales	Methanobacteriaceae	Methanobrevibacter	0	0	0	0	50	20	0	0	0	0	0	0	0	0	0	0	0	0	0	0	0	0	0	0	0	0	0	0	0	0	0	0	0	0	0	0	0	0	0	0	0	0	0
Zotu538	Archaea	Euryarchaeota	Methanomicrobia	Methanomicrobiales	Methanoregulaceae	Methanoregula	0	0	0	0	0	0	0	0	0	0	0	0	0	0	0	0	0	0	0	0	0	0	0	0	0	0	0	0	0	0	0	1	0	0	0	0	0	0	0	0	10	0	0
Zotu546	Archaea	Euryarchaeota	Methanomicrobia	Methanosarcinales	Methanosaetaceae	Methanosaeta	0	0	0	0	7	0	0	0	0	0	0	0	0	0	0	0	0	0	3	0	0	0	0	0	0	0	0	0	0	0	0	2	5	8	0	0	0	0	0	0	0	0	8
Zotu551	Archaea	Euryarchaeota	Methanobacteria	Methanobacteriales	Methanobacteriaceae	Methanobrevibacter	0	0	0	0	8	3	0	0	0	0	0	0	0	0	0	0	0	0	0	2	0	0	0	0	0	0	0	0	0	0	0	0	0	0	0	0	0	0	0	0	0	1	0
Zotu581	Archaea	Euryarchaeota	Methanomicrobia	Methanocellales	Methanocellaceae	Methanocellaceae_unclassified	0	0	0	0	0	2	0	0	0	0	0	0	0	0	0	0	0	0	0	0	0	0	0	0	0	0	0	0	0	0	0	0	0	0	0	0	0	0	0	0	0	0	0
Zotu582	Archaea	Euryarchaeota	Methanobacteria	Methanobacteriales	Methanobacteriaceae	Methanobacterium	0	0	0	0	0	0	0	0	0	0	0	0	0	0	0	0	0	0	0	0	0	0	0	0	0	0	0	0	0	0	0	0	0	0	0	0	0	0	0	0	0	6	14
Zotu711	Archaea	Euryarchaeota	Methanomicrobia	Methanomicrobiales	Methanoregulaceae	Methanoregula	0	0	0	0	0	0	0	0	0	0	0	0	0	0	0	0	2	0	0	0	0	0	0	0	0	0	0	0	0	0	0	0	0	0	0	0	0	0	0	0	0	1	4
Zotu726	Archaea	Euryarchaeota	Methanomicrobia	Methanosarcinales	Methanosarcinaceae	Methanosarcina	0	0	0	0	0	0	0	0	0	0	0	0	0	0	0	0	0	0	0	0	0	0	0	0	0	0	0	0	0	0	0	0	0	0	0	0	0	0	0	0	21	0	0
Zotu730	Archaea	Euryarchaeota	Methanomicrobia	Methanomicrobiales	Methanomicrobiales_unclassified	Methanomicrobiales_unclassified	0	0	0	0	0	0	0	0	0	0	0	0	0	0	0	0	0	0	0	0	0	0	0	0	0	0	0	0	0	0	0	0	5	0	0	0	0	0	0	0	0	0	4
Zotu735	Archaea	Euryarchaeota	Methanomicrobia	Methanosarcinales	Methanosarcinaceae	Methanosarcina	0	0	0	0	0	0	0	0	0	0	0	0	0	0	0	0	0	0	0	0	0	0	0	0	0	0	0	0	0	1	2	0	0	1	0	0	0	0	0	0	0	0	0
Zotu739	Archaea	Euryarchaeota	Methanomicrobia	Methanosarcinales	Methanosarcinaceae	Methanosarcina	0	0	0	0	0	0	0	0	0	0	0	0	0	0	0	0	0	0	0	0	0	0	0	0	0	0	0	0	0	0	0	0	0	0	0	0	0	0	0	0	0	0	4
Zotu752	Archaea	Euryarchaeota	Methanomicrobia	Methanosarcinales	Methanosarcinaceae	Methanosarcina	0	0	0	0	0	0	0	0	0	0	0	0	0	0	0	0	0	0	0	0	0	0	0	0	0	0	0	0	0	0	0	0	0	0	0	0	0	0	0	0	43	0	0
Zotu754	Archaea	Euryarchaeota	Methanomicrobia	Methanomicrobiales	Methanomicrobiales_unclassified	Methanomicrobiales_unclassified	0	0	0	0	0	0	0	0	0	0	0	0	0	0	0	0	0	0	0	0	0	0	0	0	0	0	0	0	0	0	2	16	60	0	0	0	0	0	0	0	0	0	0
Zotu759	Archaea	Euryarchaeota	Methanomicrobia	Methanocellales	Methanocellaceae	Methanocellaceae_unclassified	0	0	0	0	0	0	0	0	0	0	0	0	0	0	0	0	14	4	3	0	0	0	0	0	0	0	0	0	0	1	0	0	0	0	0	0	0	0	0	0	0	0	3
Zotu761	Archaea	Euryarchaeota	Methanomicrobia	Methanomicrobiales	Methanoregulaceae	Methanoregula	0	0	0	0	0	0	0	0	0	0	0	0	0	0	0	0	0	0	0	0	0	0	0	0	0	0	0	0	0	0	1	2	1	2	0	0	0	0	0	0	14283	0	0
Zotu762	Archaea	Euryarchaeota	Methanomicrobia	Methanomicrobiales	Methanomicrobiales_unclassified	Methanomicrobiales_unclassified	0	0	0	0	0	0	0	0	0	0	0	0	0	0	0	0	0	0	0	0	0	0	0	0	0	0	0	0	0	1	0	0	0	0	0	0	0	0	0	0	45	0	0
Zotu767	Archaea	Euryarchaeota	Methanomicrobia	Methanosarcinales	Methanosarcinaceae	Methanosarcina	0	0	0	0	0	0	0	0	0	0	0	0	0	0	0	0	0	7	6	0	0	0	0	0	0	0	0	0	0	14	0	0	0	0	0	0	0	0	0	0	0	0	0
Zotu768	Archaea	Euryarchaeota	Methanomicrobia	Methanosarcinales	Methanosaetaceae	Methanosaeta	0	0	0	0	0	0	0	0	0	0	0	0	0	0	0	0	0	0	0	0	0	0	0	0	0	0	0	0	0	6	12	50	41	0	0	0	0	0	0	0	0	0	2
Zotu773	Archaea	Euryarchaeota	Methanomicrobia	Methanosarcinales	Methanosarcinaceae	Methanosarcina	0	0	0	0	0	0	0	0	0	0	0	0	0	0	0	0	0	0	0	0	0	0	0	0	0	0	0	0	0	0	0	0	0	0	0	0	0	0	0	0	68	0	0
Zotu774	Archaea	Euryarchaeota	Methanomicrobia	Methanomicrobiales	Methanoregulaceae	Methanoregula	0	0	0	0	0	0	0	0	0	0	0	0	0	0	0	0	0	0	0	0	0	0	0	0	0	0	0	0	0	0	0	0	0	0	0	0	0	0	0	0	5	0	0
Zotu776	Archaea	Euryarchaeota	Methanomicrobia	Methanosarcinales	Methanosarcinaceae	Methanosarcina	0	0	0	0	0	0	0	0	0	0	0	0	0	0	0	0	0	0	0	0	0	0	0	0	0	0	0	0	0	0	0	0	0	0	0	0	0	0	0	0	24	0	0
Zotu778	Archaea	Euryarchaeota	Methanomicrobia	Methanosarcinales	Methanosaetaceae	Methanosaeta	0	0	0	0	0	0	0	0	0	0	0	0	0	0	0	0	0	0	1	0	0	0	0	0	0	0	0	0	0	0	0	0	0	0	0	0	0	0	0	0	0	0	0
Zotu782	Archaea	Euryarchaeota	Methanobacteria	Methanobacteriales	Methanobacteriaceae	Methanobacterium	0	0	0	0	12	0	0	0	0	0	0	0	0	0	0	0	0	0	0	0	0	0	0	0	0	0	0	0	0	0	0	0	0	0	0	0	0	0	0	0	0	0	0
Zotu789	Archaea	Euryarchaeota	Methanomicrobia	Methanosarcinales	Methanosaetaceae	Methanosaeta	0	0	0	0	0	0	0	0	0	0	0	0	0	0	0	0	0	0	0	0	0	0	0	0	0	0	0	0	0	5	16	49	26	0	0	0	0	0	0	0	0	0	1
Zotu306	Archaea	Euryarchaeota	Methanomicrobia	Methanomicrobiales	Methanoregulaceae	Methanoregula	0	0	0	0	0	0	0	0	0	0	0	0	0	0	0	0	0	0	0	0	0	0	0	0	0	0	0	0	0	1	0	0	0	0	0	0	0	0	0	0	46	0	0
Zotu314	Archaea	Euryarchaeota	Methanomicrobia	Methanosarcinales	Methanosarcinaceae	Methanosarcina	0	0	0	0	165	88	0	0	0	0	0	0	0	0	0	0	0	6	1	2	0	0	0	0	0	0	0	0	0	24	0	0	0	0	0	0	0	0	0	0	0	82	1
Zotu321	Archaea	Euryarchaeota	Thermoplasmata	Methanomassiliicoccales	Methanomassiliicoccaceae	Methanomassiliicoccus	0	0	0	0	1	0	0	0	0	0	0	0	0	0	0	0	2	82	25	0	0	0	0	0	0	0	0	0	0	4	1	0	0	0	0	0	0	0	0	0	0	0	35
Zotu322	Archaea	Euryarchaeota	Methanomicrobia	Methanosarcinales	Methanosaetaceae	Methanosaeta	0	0	0	0	16	0	0	0	0	0	0	0	0	0	0	0	0	0	0	0	0	0	0	0	0	0	0	0	0	51	0	4	3	0	0	0	0	0	0	0	0	0	0
Zotu324	Archaea	Euryarchaeota	Thermoplasmata	Methanomassiliicoccales	Methanomassiliicoccaceae	Methanomassiliicoccus	0	0	0	0	0	9	0	0	0	0	0	0	0	0	0	0	0	0	0	0	0	0	0	0	0	0	0	0	0	4	0	0	0	0	0	0	0	0	0	0	59	0	0
Zotu326	Archaea	Euryarchaeota	Methanomicrobia	Methanosarcinales	Methanosarcinaceae	Methanosarcina	0	0	0	0	0	0	0	0	0	0	0	0	0	0	0	0	0	0	1	0	0	0	0	0	0	0	0	0	0	0	0	0	0	0	0	0	0	0	0	0	0	0	0
Zotu332	Archaea	Euryarchaeota	Methanobacteria	Methanobacteriales	Methanobacteriaceae	Methanobacterium	0	0	0	0	2	0	0	0	0	0	0	0	0	0	0	0	0	0	0	0	0	0	0	0	0	0	0	0	0	5	0	0	0	0	0	0	0	0	0	0	0	6	59
Zotu333	Archaea	Euryarchaeota	Methanomicrobia	Methanosarcinales	Methanosarcinaceae	Methanosarcina	0	0	0	0	9	1	0	0	0	0	0	0	0	0	0	0	0	117	185	5	0	0	0	0	0	0	0	0	0	1	0	0	0	0	0	0	0	0	0	0	0	0	0
Zotu340	Archaea	Euryarchaeota	Thermoplasmata	Methanomassiliicoccales	Methanomassiliicoccaceae	Methanomassiliicoccus	0	0	0	0	25	3	0	0	0	0	0	0	0	0	0	0	0	0	10	0	0	0	0	0	0	0	0	0	0	5	0	0	0	0	0	0	0	0	0	0	0	16	0
Zotu346	Archaea	Euryarchaeota	Thermoplasmata	Methanomassiliicoccales	Methanomassiliicoccaceae	Methanomassiliicoccus	0	0	0	0	30	10	0	0	0	0	0	0	0	0	0	0	1	0	0	0	0	0	0	0	0	0	0	0	0	36	0	0	0	0	0	0	0	0	0	0	0	0	3
Zotu348	Archaea	Euryarchaeota	Methanomicrobia	Methanomicrobiales	Methanoregulaceae	Methanoregula	0	0	0	0	0	0	0	0	0	0	0	0	0	0	0	0	0	0	0	0	0	0	0	0	0	0	0	0	0	1	1	3	0	0	0	0	0	0	0	0	119	0	0
Zotu352	Archaea	Euryarchaeota	Thermoplasmata	Methanomassiliicoccales	Methanomassiliicoccaceae	Methanomassiliicoccus	0	0	0	0	0	0	0	0	0	0	0	0	0	0	0	0	0	0	0	0	0	0	0	0	0	0	0	0	0	0	0	0	0	0	0	0	0	0	0	0	0	0	0
Zotu373	Archaea	Euryarchaeota	Methanobacteria	Methanobacteriales	Methanobacteriaceae	Methanobrevibacter	0	0	0	0	65	54	0	0	0	0	0	0	0	0	0	0	0	0	0	1	0	0	0	0	0	0	0	2	0	1	0	0	0	0	0	0	0	0	0	0	0	0	6
Zotu375	Archaea	Euryarchaeota	Methanomicrobia	Methanosarcinales	Methanosaetaceae	Methanosaeta	0	0	0	0	0	0	0	0	0	0	0	0	0	0	0	0	0	0	0	0	0	0	0	0	0	0	0	0	0	44	0	0	0	0	0	0	0	0	0	0	0	0	0
Zotu382	Archaea	Euryarchaeota	Methanomicrobia	Methanosarcinales	Methanosarcinaceae	Methanosarcina	0	0	0	0	0	0	0	0	0	0	0	0	0	0	0	0	0	0	0	0	0	0	0	0	0	0	0	0	0	0	0	0	0	0	0	0	0	0	0	0	112	0	0
Zotu391	Archaea	Euryarchaeota	Thermoplasmata	Methanomassiliicoccales	Methanomassiliicoccaceae	Methanomassiliicoccus	0	0	0	0	0	0	0	0	0	0	0	0	0	0	0	0	20	1	0	0	0	0	0	0	0	0	0	0	0	0	0	0	0	0	0	0	0	0	0	0	0	6	0
Zotu109	Archaea	Euryarchaeota	Methanomicrobia	Methanosarcinales	Methanosarcinaceae	Methanosarcina	0	0	0	0	0	0	0	0	0	0	0	0	0	0	0	0	0	0	0	0	0	0	0	0	0	0	0	0	0	16	0	0	0	0	0	0	0	6	17	26	31	11	4
Zotu110	Archaea	Euryarchaeota	Methanobacteria	Methanobacteriales	Methanobacteriaceae	Methanobacterium	0	0	0	0	0	9	0	0	0	0	0	0	0	0	0	0	0	17	17	3	0	0	0	0	0	0	0	0	0	58	0	0	0	0	0	0	0	0	0	0	0	58	20
Zotu116	Archaea	Euryarchaeota	Methanomicrobia	Methanosarcinales	Methanosarcinaceae	Methanosarcina	0	0	0	0	0	0	0	0	0	0	0	0	0	0	0	0	0	0	0	0	0	0	0	0	0	0	0	0	0	0	0	0	0	0	0	0	0	0	0	0	100	0	0
Zotu117	Archaea	Euryarchaeota	Methanomicrobia	Methanosarcinales	Methanosaetaceae	Methanosaeta	0	0	0	0	0	0	0	0	0	0	0	0	0	0	0	0	0	0	0	0	0	0	0	0	0	0	0	0	0	10	12	1026	1941	24	0	0	0	0	0	0	0	0	0
Zotu124	Archaea	Euryarchaeota	Methanomicrobia	Methanosarcinales	Methanosaetaceae	Methanosaeta	0	0	0	0	0	0	0	0	0	0	0	0	0	0	0	0	0	0	0	0	0	0	0	0	0	0	0	0	0	726	2	0	35	0	0	0	0	0	0	0	0	0	0
Zotu128	Archaea	Euryarchaeota	Methanomicrobia	Methanosarcinales	Methanosaetaceae	Methanosaeta	0	0	0	0	0	0	0	0	0	0	0	0	0	0	0	0	0	0	1	0	0	0	0	0	0	0	0	0	0	0	0	0	0	0	0	0	0	0	0	0	0	239	9
Zotu131	Archaea	Euryarchaeota	Methanomicrobia	Methanocellales	Methanocellaceae	Methanocella	0	19	0	0	5	6	0	0	0	0	0	0	0	0	0	0	23	49	1	6	3	1	0	0	0	0	0	0	0	18	0	0	0	5	0	0	0	0	0	0	2	251	29
Zotu134	Archaea	Euryarchaeota	Methanomicrobia	Methanosarcinales	Methanosarcinaceae	Methanosarcina	0	0	0	0	7	0	0	0	0	0	0	0	0	0	0	0	2	24	37	2	0	0	0	0	0	0	0	0	0	0	0	0	0	0	0	0	0	0	0	0	0	0	2
Zotu140	Archaea	Euryarchaeota	Thermoplasmata	Methanomassiliicoccales	Methanomassiliicoccaceae	Methanomassiliicoccus	0	0	0	0	0	0	0	0	0	0	0	0	0	0	0	0	0	0	0	0	0	0	0	0	0	0	0	0	0	0	0	0	0	0	0	0	0	0	0	0	256	0	0
Zotu142	Archaea	Euryarchaeota	Methanomicrobia	Methanosarcinales	Methanosaetaceae	Methanosaeta	0	0	0	0	0	0	0	0	0	0	0	0	0	0	0	0	0	0	0	0	0	0	0	0	0	0	0	0	0	328	419	573	185	11	2	0	3	0	0	0	0	1	11
Zotu143	Archaea	Euryarchaeota	Methanomicrobia	Methanosarcinales	Methanosaetaceae	Methanosaeta	0	0	0	0	0	0	0	0	0	0	0	0	0	0	0	0	0	0	0	0	0	0	0	0	0	0	0	0	0	0	0	0	0	0	0	0	0	0	0	7	0	0	0
Zotu147	Archaea	Euryarchaeota	Methanobacteria	Methanobacteriales	Methanobacteriaceae	Methanobacterium	0	0	0	0	0	0	0	0	0	0	0	0	0	0	0	0	0	0	0	0	0	0	0	0	0	0	0	0	0	0	0	0	0	0	0	0	0	0	0	0	197	2	2
Zotu153	Archaea	Euryarchaeota	Thermoplasmata	Methanomassiliicoccales	Methanomassiliicoccaceae	Methanomassiliicoccus	0	0	0	0	0	0	0	0	0	0	0	0	0	0	0	0	0	0	0	0	0	0	0	0	0	0	0	0	0	0	0	0	0	0	0	0	0	0	0	0	443	0	0
Zotu159	Archaea	Euryarchaeota	Methanomicrobia	Methanosarcinales	Methanosarcinaceae	Methanosarcina	0	0	0	0	0	0	0	0	0	0	0	0	0	0	0	0	0	0	0	0	0	0	0	0	0	0	0	0	0	1	0	0	0	0	0	0	0	0	0	0	69	0	0
Zotu170	Archaea	Euryarchaeota	Methanomicrobia	Methanosarcinales	Methanosarcinaceae	Methanosarcina	0	0	0	0	89	113	0	0	0	0	0	0	0	0	0	0	0	21	27	2	1	0	0	0	0	0	0	0	0	24	0	0	0	1	0	0	0	0	0	0	7	0	1
Zotu185	Archaea	Euryarchaeota	Methanomicrobia	Methanosarcinales	Methanosarcinaceae	Methanosarcina	0	0	0	0	287	37	0	0	0	0	0	0	0	0	0	0	0	0	5	1	0	0	0	0	0	0	0	0	0	180	5	0	0	0	0	0	0	0	0	0	0	2	7
Zotu190	Archaea	Euryarchaeota	Methanomicrobia	Methanosarcinales	Methanosarcinaceae	Methanosarcina	0	0	0	0	23	0	0	0	0	0	0	0	0	0	0	0	370	67	57	0	0	0	0	0	0	0	0	0	0	2	0	0	0	2	0	0	0	1	2	1	22	20	62
Zotu194	Archaea	Euryarchaeota	Methanomicrobia	Methanosarcinales	Methanosarcinaceae	Methanosarcina	0	0	0	0	7	0	0	0	0	0	0	0	0	0	0	0	0	0	2	0	0	0	0	0	0	0	0	0	0	92	0	0	0	0	0	0	0	0	0	0	0	0	1
[truncated: 10 more columns]

## Sheet: Table S8 weather
site and date	time UTC	temperatur [°C]	weather	wind [m/s]	pressure (mbar)	relative humidity [%]	absolute humidity [g/kg]
Rodewald WA 211	07:50:00	0	sunny	0,5-0,7	1021.5	-	3.26
2022-03-09	10:22:00	11.7	sunny	0,5-0,7	1021.5	41.3	-
	11:52:00	12.4	sunny	0-1	1021.2	40.8	-
	12:26:00	11.8	sunny	0-0,5	1021.1	39.1	3.39
Rodewald WA 209	12:15:00	16.6	sunny	0,7-2,9	1022.8	34.9	4.1
2022-03-10	13:30:00	12	sunny	0.6	1023	42.4	3.78
	13:58:00	14.3	sunny	0-1	1022	36.9	3.74
	15:08:00	13.6	sunny	0,4-2	1021.8	33.2	3.6
Rodewald WA 273	10:53:00	8.6	overcast	0-0,6	1002.3	59.5	4
2022-03-30	12:08:00	8.2	overcast	0	1002	52	3.57
	12:56:00	8	overcast	1	1001.4	50.5	3.32
Rodewald WA 274	09:20:00	-	overcast	-	-	-	-
2022-03-31	10:20:00	6.2	overcast	1.2	99.3	64.4	3.81
	11:31:00	6.3	overcast	1	998.8	59.7	3.58
	12:43:00	7.7	overcast	1.2	998.3	59.2	3.95
	15:09:00	11.3	mostly cloudy	1.7	997.9	39	3.29
Rodewald WA 272	10:06:00	12.2	overcast	1,8_2,5	1014.8	51.4	5.52
2022-04-20	13:15:00	16	sunny	1,5-4	1014.3	45	5.42
	14:05:00	20.7	mostly sunny	0-3,5	1012.2	33.5	4.87
Rodewald WA 275	08:40:00	12.8	partly cloudy	0,5-1,2	1011.4	57.5	5.38
2022-04-21	13:51:00	16.1	partly cloudy	0,4-0,9	1009.7	43.3	5.49
	15:01:00	20.3	partly cloudy	1.7	1009.1	40.4	6.05
Rodewald WA 254	09:00:00	-	overcast	-	-	-	-
2022-04-27	12:25:00	14.8	sunny	1-4	1021.8	46.0	4.77
Rodewald WA 264	10:10:00	11	sunny	1-2	1027	53	4.33
2022-04-28	11:30:00	14	sunny	1.5	1026	51.5	4.89
	15:30:00	16.6	sunny	2-4	1025.6	43.5	5.93

## Sheet: Table S9 statistics
Sites	Min.	1st Qu.	Median	Mean	3rd Qu.	Max.	standard dev	variance
Rodewald WA-211	-2.5709	-0.2203	-0.1326	-0.474859	-0.0668	0.0137	0.773733	0.598662
Reference #1.1	-0.3759	-0.1729	-0.0928	-0.122167	-0.0105	0.0077	0.137018	0.018774
Rodewald WA-209	-2.214	-0.61	-0.1641	-0.352812	-0.0207	1.5777	0.795326	0.632543
Reference #1.2	-0.3233	-0.1485	-0.051	-0.0758889	0.0319	0.0477	0.135644	0.0183992
Rodewald WA-273	-4.3695	-1.6549	-1.2223	-1.31188	-0.6785	-0.0115	1.07453	1.15461
Reference #2.1	-2.1237	-1.141	-0.8704	-0.812913	-0.3716	0.1822	0.762575	0.581521
Rodewald WA-274	-3.7238	-1.98653	-1.16735	-1.53691	-0.86675	-0.0824	1.0788	1.16381
Reference #2.2	-1.5474	-0.8069	-0.4319	-0.514711	0.0163	0.1047	0.61763	0.381467
Rodewald WA-275	-1.163	-0.3285	-0.2016	-0.197859	-0.0083	0.6859	0.430423	0.185264
Reference #4.1	-0.1716	-0.1113	-0.0995	-0.0987778	-0.0764	-0.0404	0.0390963	0.00152852
Rodewald WA-272	-0.512	-0.1972	0.3089	25.3799	2.6031	160.069	52.1112	2715.58
Reference #3.1	-0.1895	0.2057	15.4245	50.0701	32.8873	273.803	89.4012	7992.58
Rodewald WA-254	-2.0295	-1.1984	-0.0773	0.248153	0.0871	6.8348	2.47819	6.14141
Reference #3.2	-0.3658	10.3654	73.6508	107.279	170.664	381.748	121.583	14782.5
Rodewald WA-264	-2.3448	-0.549675	-0.0473	37.5576	1.73075	538.398	133.999	17955.9
Reference #3.3	-0.3116	-0.05795	18.2526	45.3755	92.1372	125.383	54.606	2981.82
