# Supplementary material for: Interferences caused by the biogeochemical methane cycle in peats during the assessment of abandoned oil wells
Source: Copernicus journal article supplement (doi:10.5194/bg-22-809-2025), 2025-02-15
Supplement: Supplementary file 2 [file bg-22-809-2025-supplement.zip]

Supplement of

Interferences caused by the biogeochemical methane cycle in peats during the assessment of abandoned oil wells

Sebastian F. A. Jordan<sup>1\*</sup>, Stefan Schloemer<sup>1</sup>, Martin Krüger<sup>1</sup>, Tanja Heffner<sup>2</sup>, Marcus A. Horn<sup>2</sup>, Martin Blumenberg<sup>1\*</sup>

<sup>1</sup>Federal Institute for Geosciences and Natural Resources (BGR), Hannover, Stilleweg 2, 30655, Germany

<sup>2</sup>Leibniz Universität Hannover, Institute for Microbiology, Herrenhäuser Str. 2, Hannover, 30419, Germany

Correspondence to: Sebastian F. A. Jordan ([Sebastian.Jordan@bgr.de](mailto:Sebastian.Jordan@bgr.de)), Martin Blumenberg ([Martin.Blumenberg@bgr.de](mailto:Martin.Blumenberg@bgr.de))

S1 Methane emission flux measurements

The smart chamber calculates the  $r^2$  after the measurement and in our case, the majority of measurements had an  $r^2$  above 0.5. From the measurements with  $r^2 < 0.5$  the vast majority were fluxes around zero  $\text{CH}_4$  flux with a range of  $\pm 0.1 \text{ nmol m}^{-2} \text{ s}^{-1}$ . For a better understanding, we added three measurements below with fluxes of a)  $\sim -0.187 \text{ nmol m}^{-2} \text{ s}^{-1}$ , b)  $\sim 0.019 \text{ nmol m}^{-2} \text{ s}^{-1}$ , c)  $\sim 103.73 \text{ nmol m}^{-2} \text{ s}^{-1}$ .

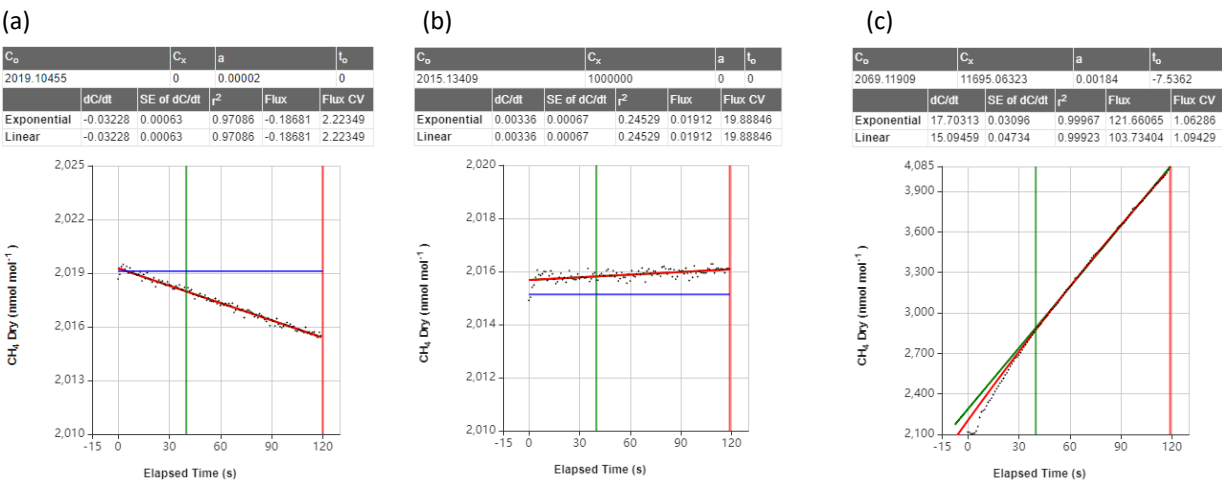

**Figure S1:** Flux measurements using the cavity enhanced absorption spectroscopy trace gas analyzer (LI-COR 7810) coupled to a portable hydraulic chamber (LI-COR smart chamber). Displayed are three measurements with fluxes of a)  $\sim -0.187 \text{ nmol m}^{-2} \text{ s}^{-1}$ , b)  $\sim 0.019 \text{ nmol m}^{-2} \text{ s}^{-1}$ , c)  $\sim 121.66 \text{ nmol m}^{-2} \text{ s}^{-1}$ . The blue horizontal line depicts the measuring time which started with the closure of the chamber at 0 s, whereas the vertical lines indicate the end of the dead band (green) and the end of measurement and opening of the chamber (red). The exponential regression (bright red) and linear regression (orange) are depicted as well.

## S2 Lipids after aerobic methane oxidation in the laboratory

28 It is well known that many methanotrophic bacteria of the Type I ( $\gamma$ -Proteobacteria) and Type II ( $\alpha$ -Proteobacteria) cluster  
30 consist of specific phospholipid fatty acids (PLFA) with Type I mainly consisting of 14 and 16 carbon atoms and Type II of  
32 18 carbon atom PLFA (e.g., Bodelier et al. (2009) and references therein). Furthermore, many of the methanotrophic bacteria  
34 in these Type clusters contain signature PLFA with C16:1 $\Delta$ 8c and C16:1 $\Delta$ 11t (or C16:1 $\omega$ 8c and C16:1 $\omega$ 5t, respectively)  
36 specific for Type I and C18:1 $\Delta$ 10c or C18:1 $\omega$ 8c for type II (Bowman et al., 1991; Nichols et al., 1985). This classification  
38 was, however, challenged by findings of the Type I specific 16:1 $\omega$ 8 (together with an abundant 18:1 $\omega$ 8) in the Type II  
methanotroph *Methylocystis heyeri* (Dedysh et al., 2007). *Methylocystis* are demonstrated to be abundant at Northern Europe,  
acidic peatlands (Dedysh, 2009) like e.g. Steimbke. In concordance to these studies, *Methylocystis* were indeed prominent in  
our phylogenetic data of the peat organic matter used for this study from Steimbke (sample 7468) prior and after the lab  
experiment. Furthermore, all Type II methanotrophic *Beijerinckia* species lack the classical 18:1 $\omega$ 8 PLFA (Knief, 2015 and  
reference therein). The differentiation between Type I and II methanotrophs is therefore complicated, while the presence of  
 $\omega$ 8 unsaturated PLFA in general remain a strong hint to methanotrophic bacteria.

40

## Material & Methods

42 Peat soil samples taken in 2022 at Steimbke, two samples from the Meadow and Peat sites both with underlying peat, and two  
other sites for comparison were incubated with about 1–2% methane in air for a duration of 22 hours up to 58 days (see Table  
44 S1). Four experiments were analyzed for changes in the lipid composition in the course of the experiments. The following  
samples were processed:

46

48 **Table S1:** Experiments analyzed for lipid changes during the course of methane addition (prior and after the experiments). Samples  
originate from the Peat site near Steimbke and the Nienhagen oil field

50

| ID   | origin                                                    | time [h] | MOx activity | MOx rate [ $\mu\text{mol g}^{-1} \text{d}^{-1}$ ] |
|------|-----------------------------------------------------------|----------|--------------|---------------------------------------------------|
| 7468 | Rodewald WA-272 (Steimbke peat extraction site), 10–15 cm | 3        | high         | 200                                               |
| 7470 | Rodewald WA-275 (Steimbke meadow/peats) , 10–15 cm        | 22.5     | low          | 5                                                 |
| 7732 | Carolinenhall, Nienhagen oil field, 10–15 cm              | ~1400    | None         | 0                                                 |
| 7734 | Carolinenhall, Nienhagen oil field, 10–15 cm              | ~1400    | none         | 0                                                 |

52 All samples were subjected to alkaline hydrolysis to cleave intact phospho- and glycolipids using a method slightly modified  
after e.g., Oppermann et al. (2010). Briefly, 5 g soil samples were subjected to 6% KOH in methanol (MeOH) in excess for 2  
54 h at 80°C in a screwed glass centrifuge tube. The resulting neutral lipids (NL) were extracted with *n*-hexane and were further  
separated into fractions of increasing polarity (hydrocarbons, ketones/aldehydes, alcohols, polar rest). Prior of the analysis, the  
56 alcohols were silylated with N,O-bis(trimethylsilyl)trifluoroacetamide (BSTFA). Acids extracted from the acidified residue  
after KOH-methanol hydrolysis, were transferred into their fatty acid methyl esters (FAME) in a screwed vial using  
58 trimethylchlorosilane (TMCS in MeOH 1:9; v:v; 2 h; 80 °C) and the combined extracted *n*-hexane phases (3x) were then, in  
addition to hydrocarbon, ketone/aldehyde and alcohol (BSTFA treated) fractions, analyzed with a GC-MS. The GC-MS  
60 comprised of an Agilent-7890 gas chromatograph equipped with a Programmable Temperature Vaporizing inlet splitting on  
two 50 m DB-1 columns (Agilent; 0.2 mm inner diameter; 0.11  $\mu\text{m}$  film thickness), coupled to an FID and to an Agilent 7000  
62 QQQ MS, each. Helium was used as carrier gas. MS-measurements were carried out in full scan mode. Compounds were  
identified by mass spectra and retention times in comparison with measurements of standard compounds. Here, only the acid  
64 fractions are presented and for simplification are named phospholipid fatty acids or “PLFA”, which make up the main  
compounds in fresh soil samples after alkaline hydrolysis. Position of double bonds were determined after GC-MS analyses  
66 of DMDS derivatives of FAME using a method modified after Buser et al. (1983) and Gatellier et al. (1993). Details can be  
found elsewhere (Berndmeyer et al., 2013).

68

**Results and Discussion**

70 Fatty acids including hydrolyzed acids from phospho- and glycolipids remained relatively similar in all experiments (Figure  
S1). For better comparison the relative changes were visualized from normalizing the (short chain) fatty acid composition to  
72 the eicosanoic acid methyl ester, which was assumed to remain unchanged as this likely originates from plant litter (and not  
microbial lipids). However, some peaks (three specific unsaturated C16 and C18 fatty acids marked with an arrow in (Figure  
74 S1) increased in the course of one experiment, where methane oxidation rate was high (7468). These compounds were mostly

absent in other experiments and did also not change in those experiments after methane-addition. Further analyses of the double bond positions revealed C16:1 $\omega$ 8c and C18:1 $\omega$ 8 (and, less specific, 16:1 $\omega$ 7), which are specific to methanotrophic bacteria. Normalized to 100% of FAMES shown in Fig. S1 (without C20:0) C16:1 $\omega$ 8 increased in the experiment 7468 (peat site) from 0.69 to 3.37% and C18:1 $\omega$ 8 from 0.95 to 4.67%. Also C16:1 $\omega$ 7 increased slightly in abundance from 0.57 to 1.26%. This compound is abundant in the other experiment samples as well, but remained unchanged there. Thus, it appears less specific. C16:1 $\omega$ 8 and C18:1 $\omega$ 8 are the most abundant PLFA in *Methylocystis heyeri* (Dedysh et al., 2007) and a *Methylocystis*-origin is in line with our phylogenetic data.

Although changes are specific to methanotrophic bacteria, changes in the PLFA (and free fatty acids) are relatively minor. This, however, is not uncommon and even occurs in highly active samples and can be explained by the high (non-methanotrophic) load of microbial and plant organic matter in the original soil (peat) samples Knoblauch et al. (2008) and the likely generally relatively low abundance of methanotrophs among the microbial community in peat (Kaupper et al., 2021).

PLFA data are indicative of the presence of methanotrophic stemming PLFA in the original sample 7468, while respective biomarkers are lacking at the other sites. This evidences the presence of methanotrophic bacteria in the studied peats and the presence of PLFA known from *Methylocystis*-relatives is in line with phylogenetic proofs of this group of MOB.

In sample 7470, only very low methane oxidation was observed during the lab experiments compared to rates in samples 7468. In addition, the methane concentrations in the original surrounding soil gases were much lower in 7470 than in 7468 (on average 9 ppm CH<sub>4</sub> and 24% CH<sub>4</sub>, respectively). PLFA data were lacking proof of MOB in 7470 from Steimbke (prior and after the experiment) as well as in other studied samples from another area in Lower Saxony (7732 and 7734).

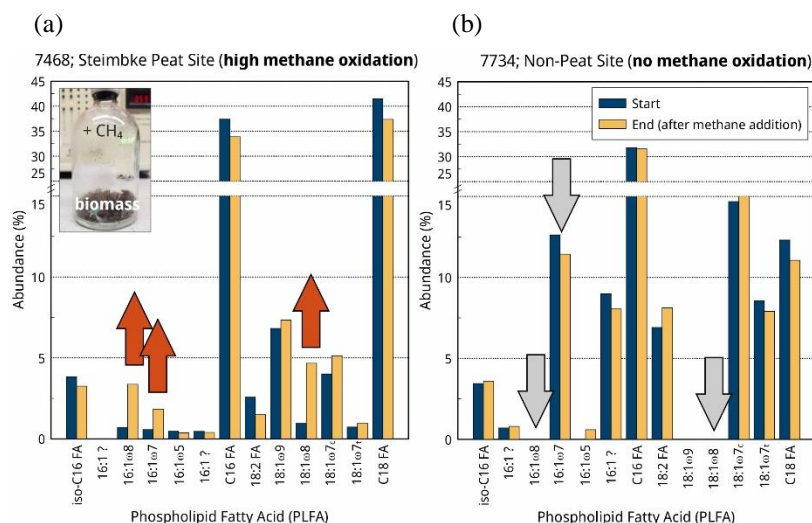

100 **S3 Fractionation factor of aerobic methane oxidation in the laboratory**

**Materials & Methods**

102 A peat soil sample (7644) taken in 2023 at Steimbke (depth: 10–25 cm) was incubated with about 3% methane in air. This  
sample was taken at the industrial peat site, where methane in the soil gas was highly concentrated. The sample, however, does  
104 not resemble that taken for the incubation experiments for PLFA analyses (7468). Three incubations were run in parallel and  
stopped after 24 h, 48 h, and 72 h (Table S2). Gases in the headspace of the vials were sampled and analyzed for gas  
106 composition and stable carbon isotopic signatures (for CH<sub>4</sub> and CO<sub>2</sub>). Gas samples were analyzed with a refinery gas analyzer  
and carbon isotopes with a GC-IRMS. More details can be found in the main paper (sections 2.4).

108

**Table S2:** Experimental isotope ( $\delta^{13}\text{C}$ ) and concentration data of gases in the headspace after addition of methane (sample 7644; Steimbke  
110 peat).  $f$  = fraction of remaining methane after addition.

| ID                | time [h] | N <sub>2</sub> [%] | CH <sub>4</sub><br>[ppm] | CO <sub>2</sub> [ppm] | O <sub>2</sub> [ppm] | CH <sub>4</sub> [ $\delta^{13}\text{C}$ ] | CO <sub>2</sub> [ $\delta^{13}\text{C}$ ] | $f$  | $\epsilon$ [‰] |
|-------------------|----------|--------------------|--------------------------|-----------------------|----------------------|-------------------------------------------|-------------------------------------------|------|----------------|
| 7644              | 0        | 75.7               | 32,729                   | 414                   | 195,500              | -44.58                                    | -28.44                                    | 1.00 |                |
| 7644              | 24       | 77.7               | 23,717                   | 7811                  | 170,001              | -31.08                                    | -68.84                                    | 0.72 |                |
| 7644              | 48       | 79.9               | 10,974                   | 14,513                | 156,917              | -8.01                                     | -59.18                                    | 0.34 |                |
| 7644              | 72       | 81.1               | 2967                     | 19,006                | 147,561              | 31.41                                     | -51.05                                    | 0.09 |                |
| Enrichment factor |          |                    |                          |                       |                      |                                           |                                           |      | -31.3          |

112 **Results & Discussion**

Gas composition changed during the experiment with methane strongly and oxygen slightly de- and CO<sub>2</sub> increasing, typical  
114 for an experiment where methane is aerobically oxidized. At the same time,  $\delta^{13}\text{C}$  values of CH<sub>4</sub> increased strongly, whereas  
 $\delta^{13}\text{C}$  values of CO<sub>2</sub> decreased.  
116 Figure S2 depicts the isotopic composition of the remaining methane, instantaneous and accumulating carbon dioxide as  
function of the fraction of the remaining methane (solid lines) assuming an initial zero CO<sub>2</sub> concentration. According to the  
118 mass and isotope balances at the time of the first experimentally measured  $\delta^{13}\text{C}$ -CO<sub>2</sub> value (at  $f = 0.72$ ) the large amount of  
accumulating CO<sub>2</sub> (28% of ~3% added methane oxidized) with a cumulative  $\delta^{13}\text{C}$ -value of -71‰ easily shifts the original  
120 soil-derived, low concentrated (~414 ppm) and isotopically slightly depleted CO<sub>2</sub> ( $\delta^{13}\text{C}$ -CO<sub>2</sub> -28.4‰) towards very negative  
values (red dashed line).

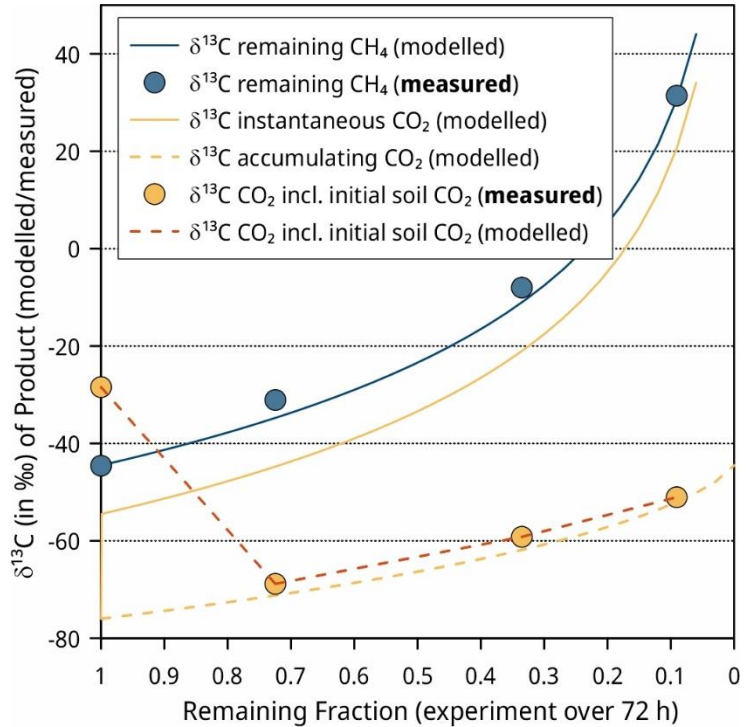

124 **Figure S3:** Closed System Rayleigh fractionation (modelled (lines) and data (dots) of the experiment) of the incubation with methane and  
air.

126 After Elsner et al. (2007) and Feisthauer et al. (2011) the slope of plotting  $\ln\left(\frac{\delta_t+1000}{\delta_0+1000}\right)$  versus  $\ln\left(\frac{C_t}{C_0}\right)$  gives the enrichment  
factor  $\epsilon$  (in‰; see Table S2 and Figure S3).

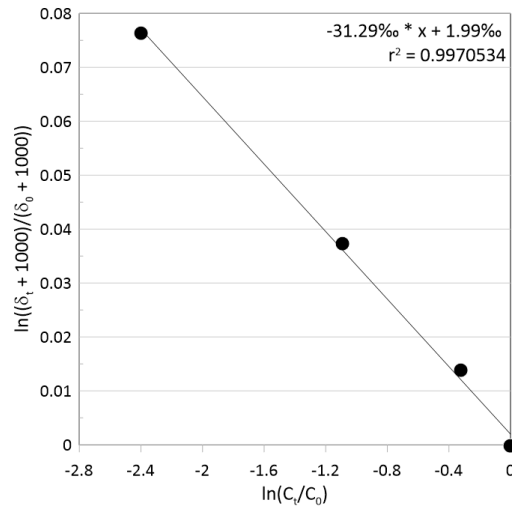

**Figure S4:** Methane concentration and  $\delta^{13}\text{C}$  change during the lab experiment 7644 (Steimbke peat). The slope (in ‰) corresponds to the enrichment factor  $\varepsilon$  (after Elsner et al. (2007) and Feisthauer et al. (2011)).

132

The calculated enrichment factor  $\varepsilon$  is with  $-31.3\text{‰}$  (Figure S3) in the upper known range of data from laboratory experiments and cultures for aerobic methanotrophs ( $-3$  to  $-39\text{‰}$ ; Templeton et al. (2006) and references therein). It has to be considered that respective data are still limited, but the so far reported data demonstrate that a differentiation between the alpha- and gamma-proteobacteria or between the carbon assimilation pathway (Type I: assimilation of formaldehyde via the ribulose-monophosphate pathway; Type II: serine pathway) cannot be achieved from isotopic enrichment factors (Feisthauer et al., 2011; Rasigraf et al., 2012). In a comparative study highest fractionation factors were with  $-27.9$  and  $-27.7\text{‰}$ , however, reported for the Type I methanotrophs *Methylococcus capsulatus* and *Methylomonas methanica* (Feisthauer et al., 2011). Our data and our lab enrichment culture dominated by members of the genera *Methylocystis* and *Methylobacter* add, however, further data on this still limited data set. Obviously, the isotopic fractionation of methane during aerobic methanotrophy at Steimbke results in a relatively strong fractionation. Reasons for this observation are, however, unclear. Previous studies speculated on the growth rates and physiological factors, and/or substrate limitation. Low oxygen concentrations may, theoretically, slow down methane oxidation by that favoring fractionation (Rasigraf et al., 2012; Templeton et al., 2006).

146

S4 Methane flux data

148

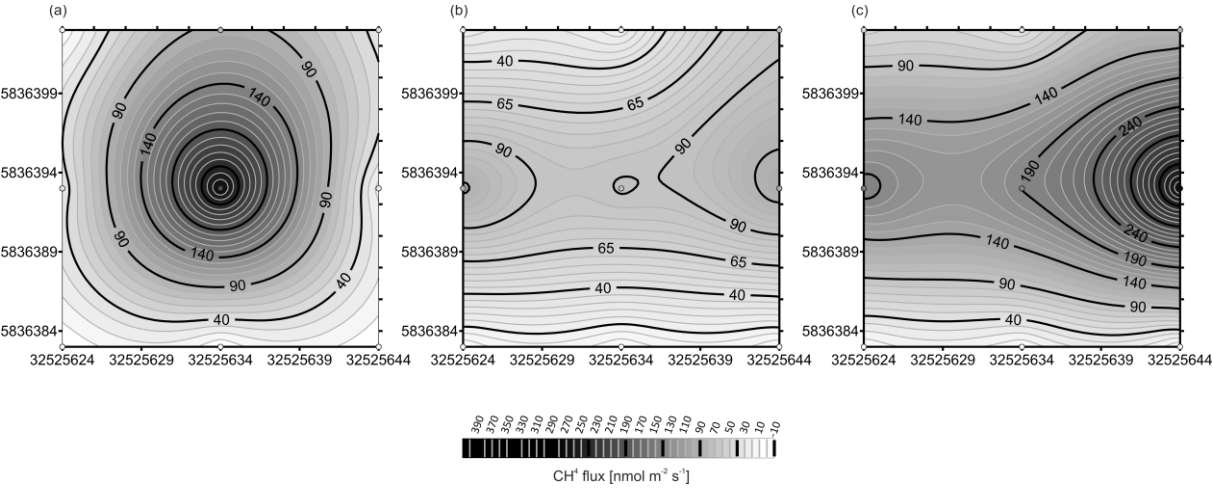

150 **Figure S5:** Gridding of methane fluxes from soil to the atmosphere at one reference site (a, b, c), which was measured at different time  
152 points in the active peat cutting area. First on April 20, 2022 (a), and then one week later on two consecutive days (April 27, (b) and 28 (c),  
2022) (see Table 1). The grey scale is depicted on the bottom right.

154



## S5 References

- 156 Berndmeyer, C., Thiel, V., Schmale, O., and Blumenberg, M.: Biomarkers for aerobic methanotrophy in the  
water column of the stratified Gotland Deep (Baltic Sea), *Org Geochem*, 55, 103-111,  
158 <https://doi.org/10.1016/j.orggeochem.2012.11.010>, 2013.
- Bodelier, P. L., Gillisen, M. J., Hordijk, K., Damste, J. S., Rijpstra, W. I., Geenevasen, J. A., and Dunfield, P. F.:  
160 A reanalysis of phospholipid fatty acids as ecological biomarkers for methanotrophic bacteria, *ISME J*, 3, 606-  
617, <https://doi.org/10.1038/ismej.2009.6>, 2009.
- 162 Bowman, J. P., Skerratt, J. H., Nichols, P. D., and Sly, L. I.: Phospholipid fatty acid and lipopolysaccharide fatty  
acid signature lipids in methane-utilizing bacteria, *FEMS Microbiol Lett*, 85, 15-22,  
164 <https://doi.org/10.1111/j.1574-6968.1991.tb04693.x>, 1991.
- Buser, H. R., Arn, H., Guerin, P., and Rauscher, S.: Determination of double bond position in mono-unsaturated  
166 acetates by mass spectrometry of dimethyl disulfide adducts, *Anal Chem*, 55, 818-822,  
<https://doi.org/10.1021/ac00257a003>, 1983.
- 168 Dedysh, S. N.: Exploring methanotroph diversity in acidic northern wetlands: Molecular and cultivation-based  
studies, *Microbiology*, 78, 655-669, <https://doi.org/10.1134/s0026261709060010>, 2009.
- 170 Dedysh, S. N., Belova, S. E., Bodelier, P. L. E., Smirnova, K. V., Khmelenina, V. N., Chidthaisong, A.,  
Trotsenko, Y. A., Liesack, W., and Dunfield, P. F.: *Methylocystis heyeri* sp. nov., a novel type II  
172 methanotrophic bacterium possessing 'signature' fatty acids of type I methanotrophs, *Int J Syst Evol*  
*Microbiol*, 57, 472-479, 10.1099/ijs.0.64623-0, 2007.
- 174 Elsner, M., McKelvie, J., Lacrampe Couloume, G., and Sherwood Lollar, B.: Insight into Methyl tert-Butyl Ether  
(MTBE) Stable Isotope Fractionation from Abiotic Reference Experiments, *Environ Sci Technol*, 41, 5693-  
176 5700, 10.1021/es070531o, 2007.
- Feisthauer, S., Vogt, C., Modrzyński, J., Szlenkier, M., Krüger, M., Siegert, M., and Richnow, H.-H.: Different  
178 types of methane monooxygenases produce similar carbon and hydrogen isotope fractionation patterns during  
methane oxidation, *Geochim Cosmochim Acta*, 75, 1173-1184, <https://doi.org/10.1016/j.gca.2010.12.006>, 2011.
- 180 Gatellier, J.-P. L. A., de Leeuw, J. W., Sinninghe Damsté, J. S., Derenne, S., Largeau, C., and Metzger, P.: A  
comparative study of macromolecular substances of a Coorongite and cell walls of the extant alga  
182 *Botryococcus braunii*, *Geochim Cosmochim Acta*, 57, 2053-2068, [https://doi.org/10.1016/0016-7037\(93\)90093-c](https://doi.org/10.1016/0016-7037(93)90093-c), 1993.
- 184 Kaupper, T., Mendes, L. W., Harnisz, M., Krause, S. M. B., Horn, M. A., and Ho, A.: Recovery in  
methanotrophic activity does not reflect on the methane-driven interaction network after peat mining, *Appl*  
186 *Environ Microbiol*, 87, <https://doi.org/10.1128/AEM.02355-20>, 2021.
- Knief, C.: Diversity and Habitat Preferences of Cultivated and Uncultivated Aerobic Methanotrophic Bacteria  
188 Evaluated Based on *pmoA* as Molecular Marker, *Front Microbiol*, 6, 1346,  
<https://doi.org/10.3389/fmicb.2015.01346>, 2015.
- 190 Knoblauch, C., Zimmermann, U., Blumenberg, M., Michaelis, W., and Pfeiffer, E.-M.: Methane turnover and  
temperature response of methane-oxidizing bacteria in permafrost-affected soils of northeast Siberia, *Soil Biol*  
192 *Biochem*, 40, 3004-3013, <https://doi.org/10.1016/j.soilbio.2008.08.020>, 2008.
- Nichols, P. D., Glen A, S., Antworth, C. P., Hanson, R. S., and White, D. C.: Phospholipid and  
194 lipopolysaccharide normal and hydroxy fatty acids as potential signatures for methane-oxidizing bacteria,  
*FEMS Microbiol Lett*, 31, 327-335, <https://doi.org/10.1111/j.1574-6968.1985.tb01168.x>, 1985.
- 196 Oppermann, B. I., Michaelis, W., Blumenberg, M., Frerichs, J., Schulz, H. M., Schippers, A., Beaubien, S. E.,  
and Krüger, M.: Soil microbial community changes as a result of long-term exposure to a natural CO<sub>2</sub> vent,  
198 *Geochim Cosmochim Acta*, 74, 2697-2716, <https://doi.org/10.1016/j.gca.2010.02.006>, 2010.

200 Rasigraf, O., Vogt, C., Richnow, H.-H., Jetten, M. S. M., and Ettwig, K. F.: Carbon and hydrogen isotope  
fractionation during nitrite-dependent anaerobic methane oxidation by *Methyloirabilis oxyfera*, *Geochim*  
202 *Cosmochim Ac*, 89, 256-264, <http://dx.doi.org/10.1016/j.gca.2012.04.054>, 2012.  
Templeton, A. S., Chu, K.-H., Alvarez-Cohen, L., and Conrad, M. E.: Variable carbon isotope fractionation  
expressed by aerobic CH<sub>4</sub>-oxidizing bacteria, *Geochim Cosmochim Ac*, 70, 1739-1752,  
204 <https://doi.org/10.1016/j.gca.2005.12.002>, 2006.
